# Supplementary material for: Highly enantioselective Friedel–Crafts alkylation of indoles and pyrrole with β,γ-unsaturated α-ketoesters catalyzed by heteroarylidene-tethered bis(oxazoline) copper complexes
Source: Royal Society of Chemistry journal article supplement (doi:10.1039/c2cc34803a), 2012-01-01
Supplement: c2cc34803a.pdf [file c2cc34803a.pdf]

*Supporting Information for*

**Highly Enantioselective Friedel–Crafts Alkylation of Indole and Pyrrole With  $\beta$ ,  $\gamma$ -Unsaturated  $\alpha$ -Ketoester Catalyzed by Heteroarylidenes-tethered Bis(oxazoline) Copper Complexes**

Lei Liu, Hongli Ma, Yumei Xiao, Fengpei Du, Zhaohai Qin, Nan Li and Bin Fu\*

*Department of Applied Chemistry, China Agricultural University*  
*Beijing 100193, P. R. China*  
**fubinchem@cau.edu.cn**

**Contents of supporting information**

|                                                                                                                                               |     |
|-----------------------------------------------------------------------------------------------------------------------------------------------|-----|
| 1 The F-C alkylation procedures and spectroscopic datas of indoles and pyrrole with $\beta$ , $\gamma$ -unsaturated $\alpha$ -ketoesters..... | S2  |
| 2. HPLC chromatograms for indole adducts.....                                                                                                 | S16 |
| 2. HPLC chromatograms for pyrrole adducts.....                                                                                                | S35 |
| 3. $^1\text{H}$ NMR and $^{13}\text{C}$ NMR spectra for F-C alkylation adducts .....                                                          | S50 |
| 4. The structure of pyrrole adduct <b>8e</b> determined by X-ray analysis.....                                                                | S84 |

## Experimental Section

NMR spectra were recorded with a Bruker Avance DPX300 spectrometer with tetramethylsilane as the internal standard. Infrared spectra were obtained on a Nicolet AVATAR 330 FT-IR spectrometer. Mass spectra were obtained on Bruker APEX II FT-ICRMS mass spectrometer. Optical rotations were measured on a Perkin–Elmer 341 LC polarimeter. The enantiomeric excesses of (*R*)- and (*S*)-enantiomer were determined by HPLC analysis over a chiral column (Daicel Chiralcel OD-H, AD-H and AS-H; eluted with hexane-isopropyl alcohol; UV detector). The absolute configuration of the major enantiomer was assigned by comparison with literatures or by XRA analysis. Solvents were purified and dried by standard procedures.

### The F-C alkylation of indole derivatives with $\beta$ , $\gamma$ -unsaturated $\alpha$ -keto butyric acid methyl esters

To a Schlenk tube Cu(OTf)<sub>2</sub> (0.0125mmol) and ligand **3a** (0.014mmol) were added in a solvent of dichloromethane (1.2 mL) under N<sub>2</sub>, after the solution was stirred for 2 h at room temperature,  $\gamma$ -phenyl  $\beta$ ,  $\gamma$ -unsaturated  $\alpha$ -keto butyric methyl ester (0.25 mmol) was added, subsequently, the resulting mixture was cooled to -78 °C and stirred for 15 min, indoles (0.25 mmol) was finally added. After stirring for 10 min to 10 hours at -78 °C. the reactant was directly purified by flash column chromatography on silica gel (eluted with ethyl acetate/petroleum ether (1/4 or 1/3, v/v) to afford the desired indole product.

### The F-C alkylation of pyrrole with $\beta$ , $\gamma$ -unsaturated $\alpha$ -keto butyric acid methyl esters

To a Schlenk tube Cu(OTf)<sub>2</sub> (0.0125mmol) and ligand **3a** (0.014mmol) were added in a solvent of dichloromethane (1.2 mL) under N<sub>2</sub>, after the solution was stirred for 2 h at room temperature,  $\gamma$ -phenyl  $\beta$ ,  $\gamma$ -unsaturated  $\alpha$ -keto butyric acid methyl ester (0.25mmol) was added. The resulting mixture was cooled to -78 °C and stirred for 15 min, pyrrole (0.75mmol) was finally added. After stirring for 5~30 min at -78 °C. the reactant was directly purified by flash column chromatography on silica gel (eluted with ethyl acetate/petroleum ether (1/5 or 1/3, v/v) to afford the desired pyrrole product .

**(+)-4-(1H-Indol-3-yl)-2-oxo-4-phenylbutyric acid methyl ester**

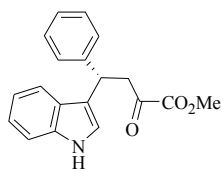

White solid; 99% yield; Mp:95-97 °C;  $[\alpha]_D^{23} = +17.8$  ( $c = 0.42$ ,  $\text{CHCl}_3$ ); 99.7 ee%, determined by HPLC analysis [Daicel Chiralcel AD-H column,  $n$ -hexane/ $i$ -PrOH = 80:20, 1.0 mL/min, 220 nm;  $t$  (minor) = 13.41 min,  $t$  (major) = 15.84 min];  $^1\text{H}$  NMR (300 MHz,  $\text{CDCl}_3$ ):  $\delta$  8.00 (br s, 1H), 7.42 (d,  $J = 7.9$  Hz, 1H), 7.33-7.23 (m, 5H), 7.19-7.12 (m, 2H), 7.04-7.00 (m, 2H), 4.91 (t,  $J = 7.5$  Hz, 1H), 3.75 (s, 3H,  $\text{CH}_3$ ), 3.69 (dd,  $J = 7.4, 17.0$  Hz, 1H), 3.60 (dd,  $J = 7.8, 17.0$  Hz, 1H) ppm.  $^{13}\text{C}$  NMR (75 MHz,  $\text{CDCl}_3$ ):  $\delta$  192.5, 161.2, 143.0, 136.4, 128.4, 127.6, 126.5, 126.3, 122.2, 121.4, 119.4, 119.3, 118.2, 111.0, 52.8, 45.5, 37.6 ppm. ESI-HRMS Calcd for  $\text{C}_{19}\text{H}_{18}\text{NO}_3$   $[\text{M} + \text{H}]^+$  308.12812, Found: 308.12808.

**(+)-4-(1H-Indol-3-yl)-2-oxo-4-(2-chlorophenyl)butyric acid methyl ester**

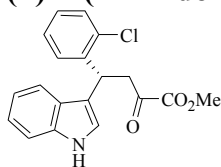

White solid; 95% yield; Mp:108-109 °C;  $[\alpha]_D^{23} = +98.6$  ( $c = 0.43$ ,  $\text{CH}_2\text{Cl}_2$ ); 99.5% ee, determined by HPLC analysis [Daicel Chiralcel AD-H column,  $n$ -hexane/ $i$ -PrOH = 80:20, 1.0 mL/min, 220 nm;  $t$  (minor) = 11.17 min,  $t$  (major) = 13.23 min];  $^1\text{H}$  NMR (300 MHz,  $\text{CDCl}_3$ ):  $\delta$  8.05 (br s, 1H), 7.43 (d,  $J = 7.9$  Hz, 1H), 7.39-7.36 (m, 1H), 7.30 (d,  $J = 8.1$  Hz, 1H), 7.21-7.00 (m, 6H), 5.43 (dd,  $J = 6.5, 8.4$  Hz, 1H), 3.79 (s, 3H), 3.73 (dd,  $J = 8.8, 17.0$  Hz, 1H), 3.47 (dd,  $J = 6.3, 16.9$  Hz, 1H) ppm.  $^{13}\text{C}$  NMR (75 MHz,  $\text{CDCl}_3$ ):  $\delta$  192.1, 161.3, 140.5, 136.5, 133.5, 129.7, 129.0, 127.9, 127.0, 126.5, 122.4, 122.0, 119.6, 119.3, 116.9, 111.1, 52.9, 44.6, 34.2 ppm. ESI-HRMS Calcd for  $\text{C}_{19}\text{H}_{17}\text{ClNO}_3$   $[\text{M} + \text{H}]^+$  342.08915, Found: 342.08931.

**(+)-4-(1H-Indol-3-yl)-2-oxo-4-(3-bromophenyl)butyric acid methyl ester**

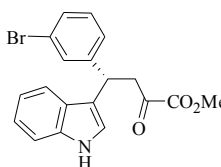

White solid; 99% yield; Mp: 109-111 °C;  $[\alpha]_D^{23} = +28.0$  ( $c = 0.30$ ,  $\text{CH}_2\text{Cl}_2$ ); 99.7% ee, determined by HPLC analysis [Daicel Chiralcel AD-H column,  $n$ -hexane/ $i$ -PrOH = 80:20, 1.0 mL/min, 220 nm;  $t$  (minor) = 10.96 min,  $t$  (major) = 12.09 min];  $^1\text{H}$  NMR (300 MHz,  $\text{CDCl}_3$ ):  $\delta$  8.06 (br s, 1H), 7.46-7.45 (m, 1H), 7.40 (d,  $J = 7.9$  Hz, 1H), 7.33-7.24 (m, 3H), 7.16-7.01 (m, 4H), 4.88 (t,  $J = 7.5$  Hz, 1H), 3.78 (s, 3H), 3.67 (dd,  $J = 7.2, 17.4$  Hz, 1H), 3.56 (dd,  $J = 7.8, 17.4$  Hz, 1H) ppm.  $^{13}\text{C}$  NMR (75 MHz,  $\text{CDCl}_3$ ):  $\delta$  192.1, 161.2, 145.7, 136.5, 130.8, 130.1, 129.8, 126.5,

126.2, 122.6, 122.5, 121.5, 119.7, 119.2, 117.6, 111.2, 53.0, 45.4, 37.3 ppm. ESI-HRMS  
Calcd for C<sub>19</sub>H<sub>17</sub>BrNO<sub>3</sub> [M + H]<sup>+</sup> 386.03863, Found: 386.03899.

**(+)-4-(1H-Indol-3-yl)-2-oxo-4-(2,4-dichlorophenyl)butyric acid methyl ester**

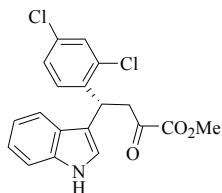

White solid; 95%yield; Mp:102-103 °C; [ $\alpha$ ]<sub>D</sub><sup>23</sup> = +86.7 (c = 0.26, CH<sub>2</sub>Cl<sub>2</sub>);  
99.9% ee, determined by HPLC analysis [Daicel Chiralcel AD-H column,  
*n*-hexane/*i*-PrOH = 80:20, 1.0 mL/min, 220 nm; t (minor) = 8.96 min, t  
(major)= 12.68 min]; <sup>1</sup>H NMR (300 MHz, CDCl<sub>3</sub>): δ 8.08 (br s, 1H),  
7.40-7.30 (m, 3H), 7.19-7.01 (m, 5H), 5.37 (dd, *J* = 6.5, 8.6 Hz, 1H), 3.80 (s, 3H, OCH<sub>3</sub>),  
3.71 (dd, *J* = 8.6, 17.1 Hz, 1H), 3.43 (dd, *J* = 6.3, 17.1 Hz, 1H) ppm. <sup>13</sup>C NMR (75 MHz,  
CDCl<sub>3</sub>): δ 191.8, 161.2, 139.2, 136.5, 134.1, 132.9, 129.9, 129.5, 127.3, 126.3, 122.5, 122.0,  
119.8, 119.2, 116.4, 111.2, 53.0, 44.3, 33.8 ppm. ESI-HRMS Calcd for C<sub>19</sub>H<sub>16</sub>Cl<sub>2</sub>NO<sub>3</sub> [M +  
H]<sup>+</sup> 376.05018, Found: 376.04999.

**(+)-4-(1H-Indol-3-yl)-2-oxo-4-(4-fluorophenyl)butyric acid methyl ester**

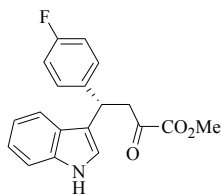

White solid; 99% yield; Mp: 95-96 °C; [ $\alpha$ ]<sub>D</sub><sup>23</sup> = +58.3 (c = 0.36, CH<sub>2</sub>Cl<sub>2</sub>);  
99.8% ee, determined by HPLC analysis [Daicel Chiralcel AD-H column,  
*n*-hexane/*i*-PrOH = 80:20, 1.0 mL/min, 220 nm; t (minor) = 12.04 min, t  
(major)= 16.99 min]; <sup>1</sup>H NMR (300 MHz, CDCl<sub>3</sub>): δ 8.03 (br s, 1H),  
7.39-7.25 (m, 4H), 7.19-7.13 (m, 1H), 7.05-6.91 (m, 4H), 4.90 (t, *J* = 7.5 Hz, 1H), 3.78 (s,  
3H, OCH<sub>3</sub>), 3.67 (dd, *J* = 7.1, 17.1 Hz, 1H), 3.57 (dd, *J* = 8.0, 17.1 Hz, 1H) ppm. <sup>13</sup>C NMR  
(75 MHz, CDCl<sub>3</sub>): δ 192.4, 163.2, 161.3, 159.9, 138.9, 138.8, 136.6, 129.3, 129.2, 126.3,  
122.4, 121.4, 119.6, 119.3, 118.2, 115.4, 115.2, 111.2, 52.9, 45.7, 37.0 ppm. ESI-HRMS  
Calcd for C<sub>19</sub>H<sub>17</sub>FNO<sub>3</sub> [M + H]<sup>+</sup> 326.11870, Found: 326.11853.

**(+)-4-(1H-Indol-3-yl)-2-oxo-4-(4-bromophenyl)butyric acid methyl ester**

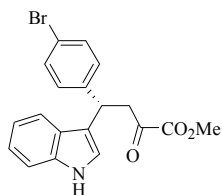

White solid; 90%yield; Mp: 143-145 °C; [ $\alpha$ ]<sub>D</sub><sup>23</sup> = +10.6 (c = 0.34, CHCl<sub>3</sub>);  
99.1% ee, determined by HPLC analysis [Daicel Chiralcel AD-H column,  
*n*-hexane/*i*-PrOH = 80:20, 1.0 mL/min, 220 nm; t (minor) = 13.29 min, t

(major)= 21.68 min];  $^1\text{H}$  NMR (300 MHz,  $\text{CDCl}_3$ ):  $\delta$  8.04 (br s, 1H), 7.39-7.31 (m, 4H), 7.25-7.14 (m, 3H), 7.05-7.02 (m, 2H), 4.87 (t,  $J$  = 7.4 Hz, 1H), 3.78 (s, 3H,  $\text{OCH}_3$ ), 3.67 (dd,  $J$  = 7.1, 17.3 Hz, 1H), 3.56 (dd,  $J$  = 8.0, 17.4 Hz, 1H) ppm.  $^{13}\text{C}$  NMR (75 MHz,  $\text{CDCl}_3$ ):  $\delta$  192.1, 161.1, 142.2, 136.5, 131.5, 129.4, 126.1, 122.3, 121.3, 120.3, 119.5, 119.1, 117.6, 111.1, 52.9, 45.3, 37.0 ppm. ESI-HRMS Calcd for  $\text{C}_{19}\text{H}_{17}\text{BrNO}_3$   $[\text{M} + \text{H}]^+$  386.03863, Found: 386.03878.

**(+)-4-(1H-Indol-3-yl)-2-oxo-4-(4-cyanophenyl)butyric acid methyl ester**

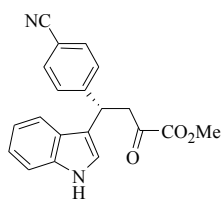

White solid; 94% yield; Mp: 168-169°C;  $[\alpha]_D^{23} = +16.0$  ( $c$  = 0.25,  $\text{CH}_2\text{Cl}_2$ ); 99.7% ee, determined by HPLC analysis [Daicel Chiralcel AD-H column,  $n$ -hexane/ $i$ -PrOH = 80:20, 1.0 mL/min, 220 nm; t (minor) = 22.09 min, t (major)= 32.57 min];  $^1\text{H}$  NMR (300 MHz,  $\text{CDCl}_3$ ):  $\delta$  8.14 (br s, 1H), 7.56-7.52 (m, 2H), 7.45-7.42 (m, 2H), 7.36-7.31 (m, 2H), 7.18-7.15 (m, 1H), 7.07-7.01 (m, 2H), 4.96 (t,  $J$  = 7.5 Hz, 1H), 3.80 (s, 3H,  $\text{OCH}_3$ ), 3.71 (dd,  $J$  = 6.9, 17.6 Hz, 1H), 3.60 (dd,  $J$  = 8.0, 17.6 Hz, 1H) ppm.  $^{13}\text{C}$  NMR (75 MHz,  $\text{CDCl}_3$ ):  $\delta$  191.7, 161.1, 148.8, 136.6, 132.4, 128.6, 126.0, 122.7, 121.5, 119.9, 119.0, 118.8, 116.9, 111.3, 110.5, 53.1, 45.0, 37.6 ppm. ESI-HRMS Calcd for  $\text{C}_{20}\text{H}_{17}\text{N}_2\text{O}_3$   $[\text{M} + \text{H}]^+$  333.12337, Found: 333.12335.

**(+)-4-(1H-Indol-3-yl)-2-oxo-4-(4-nitrophenyl)butyric acid methyl ester**

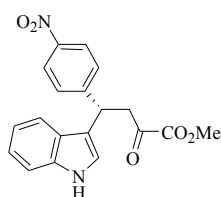

Lght yellow solid; 88% yield; Mp: 147-148°C;  $[\alpha]_D^{23} = +8.90$  ( $c$  = 0.37,  $\text{CH}_2\text{Cl}_2$ ); 99.7% ee, determined by HPLC analysis [Daicel Chiralcel AD-H column,  $n$ -hexane/ $i$ -PrOH = 80:20, 1.0 mL/min, 220 nm; t (minor) = 24.205 min, t (major)= 31.22 min];  $^1\text{H}$  NMR (300 MHz,  $\text{CDCl}_3$ ):  $\delta$  8.17 (br s, 1H), 8.10 (dd,  $J$  = 2.0, 6.8 Hz, 2H), 7.49 (dd,  $J$  = 1.8, 6.8 Hz, 2H), 7.35-7.31 (m, 2H), 7.17 (dt,  $J$  = 1.0, 7.1 Hz, 1H), 7.09-7.00 (m, 2H), 5.01 (t,  $J$  = 7.4 Hz, 1H), 3.81 (s, 3H,  $\text{OCH}_3$ ), 3.74 (dd,  $J$  = 6.9, 17.8 Hz, 1H), 3.63 (dd,  $J$  = 8.0, 17.8 Hz, 1H) ppm.  $^{13}\text{C}$  NMR (75 MHz,  $\text{CDCl}_3$ ):  $\delta$  191.7, 161.0, 151.0, 146.6, 136.6, 128.7, 125.9, 123.8, 122.6, 121.6, 119.8, 118.9, 116.7, 111.4, 53.1, 45.0, 37.3 ppm. ESI-HRMS Calcd for  $\text{C}_{19}\text{H}_{17}\text{N}_2\text{O}_5$   $[\text{M} + \text{H}]^+$  353.11320, Found: 353.11328.

**(+)-4-(1H-Indol-3-yl)-2-oxo-4-(4-trifluoromethyl)butyric acid methyl ester**

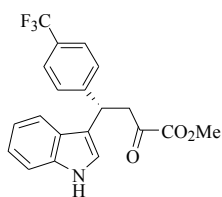

White solid; 95%yield; Mp:130-131 °C;  $[\alpha]_D^{23} = +37.5$  ( $c = 0.34$ ,  $\text{CH}_2\text{Cl}_2$ ); 99.6% ee, determined by HPLC analysis [Daicel Chiralcel AD-H column,  $n$ -hexane/ $i$ -PrOH = 80:20, 1.0 mL/min, 220 nm;  $t$  (minor) = 8.92 min,  $t$  (major)= 12.56 min];  $^1\text{H}$  NMR (300 MHz,  $\text{CDCl}_3$ ):  $\delta$  8.08 (br s, 1H), 7.51 (d,  $J = 8.3$  Hz, 2H), 7.44 (d,  $J = 8.2$  Hz, 2H), 7.39-7.31 (m, 2H), 7.17 (dd,  $J = 1.1, 7.1$  Hz, 1H), 7.06-7.01 (m, 2H), 4.97 (t,  $J = 7.5$  Hz, 1H), 3.78 (s, 3H  $\text{OCH}_3$ ), 3.71 (dd,  $J = 7.0, 17.4$  Hz, 1H), 3.61 (dd,  $J = 7.9, 17.4$  Hz, 1H) ppm.  $^{13}\text{C}$  NMR (75 MHz,  $\text{CDCl}_3$ ):  $\delta$  192.0, 161.1, 147.3, 136.6, 128.9(q,  $J = 32.5$  Hz), 128.1, 126.1, 125.5 (q,  $J = 3.8$  Hz), 124.1 (q,  $J = 272.0$  Hz), 122.5, 121.5, 119.7, 119.1, 117.4, 111.3, 53.0, 45.3, 37.4 ppm. ESI-HRMS Calcd for  $\text{C}_{20}\text{H}_{17}\text{F}_3\text{NO}_3$   $[\text{M} + \text{H}]^+$  376.11550, Found: 376.11554.

**(+)-4-(1H-Indol-3-yl)-2-oxo-4-(3-methylphenyl)butyric acid methyl ester**

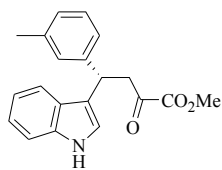

Light yellow solid; 89% yield; Mp: 98-100 °C;  $[\alpha]_D^{23} = +33.3$  ( $c = 0.60$ ,  $\text{CH}_2\text{Cl}_2$ ); 99.3% ee, determined by HPLC analysis [Daicel Chiralcel AS-H column,  $n$ -hexane/ $i$ -PrOH = 85:15, 1.0 mL/min, 220 nm;  $t$  (minor) = 13.793min,  $t$  (major)= 14.71 min];  $^1\text{H}$  NMR (300 MHz,  $\text{CDCl}_3$ ):  $\delta$  8.00 (br s, 1H), 7.44 (dd,  $J = 0.9, 7.9$  Hz, 1H), 7.30-7.27 (m, 1H), 7.14-7.11 (m, 4H), 7.05-6.98 (m, 3H), 4.87 (t,  $J = 7.5$  Hz, 1H), 3.74 (s, 3H,  $\text{OCH}_3$ ), 3.67 (dd,  $J = 7.4, 17.0$  Hz, 1H), 3.57 (dd,  $J = 7.7, 17.0$  Hz, 1H), 2.27(s, 3H) ppm.  $^{13}\text{C}$  NMR (75 MHz,  $\text{CDCl}_3$ ):  $\delta$  192.7, 161.3, 143.1, 138.0, 136.5, 128.5, 128.4, 127.3, 126.4, 124.7, 122.2, 121.5, 119.5, 119.4, 118.3, 111.1, 52.8, 45.7, 37.6, 21.4 ppm. ESI-HRMS Calcd for  $\text{C}_{20}\text{H}_{20}\text{NO}_3$   $[\text{M} + \text{H}]^+$  322.14377, Found: 322.14375.

**(+)-4-(1H-Indol-3-yl)-2-oxo-4-(4-methylphenyl)butyric acid methyl ester**

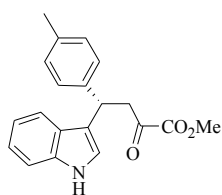

Light yellow solid; 92% yield; Mp:114-116 °C;  $[\alpha]_D^{23} = +130.6$  ( $c = 0.44$ ,  $\text{CH}_2\text{Cl}_2$ ); 99.2% ee, determined by HPLC analysis [Daicel Chiralcel AD-H column,  $n$ -hexane/ $i$ -PrOH = 80:20, 1.0 mL/min, 220 nm;  $t$  (minor) = 13.81 min,  $t$  (major)= 18.09 min];  $^1\text{H}$  NMR (300 MHz,  $\text{CDCl}_3$ ):  $\delta$  7.98 (br s, 1H), 7.42 (d,  $J = 7.9$  Hz, 1H), 7.28 (d,  $J = 8.1$  Hz, 1H), 7.22-7.19 (m, 2H), 7.16-7.11 (m, 1H), 7.07-6.97 (m, 4H), 4.87 (t,  $J = 7.6$  Hz, 1H), 3.74 (s, 3H,  $\text{OCH}_3$ ), 3.66 (dd,  $J = 7.3,$

16.9 Hz, 1H), 3.57 (dd,  $J = 7.9, 16.9$  Hz, 1H) ppm.  $^{13}\text{C}$  NMR (75 MHz,  $\text{CDCl}_3$ ):  $\delta$  192.7, 161.3, 140.1, 136.5, 136.1, 129.2, 127.6, 126.4, 122.2, 121.4, 119.5, 119.4, 118.5, 111.1, 52.8, 45.7, 37.3, 20.9 ppm. ESI-HRMS Calcd for  $\text{C}_{20}\text{H}_{20}\text{NO}_3$   $[\text{M} + \text{H}]^+$  322.14377, Found: 322.14376.

**(+)-4-(1H-Indol-3-yl)-2-oxo-4-(4-methoxyphenyl)butyric acid methyl ester**

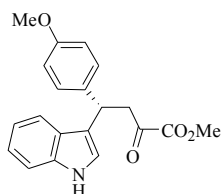

White solid; 95%yield; Mp:111-112°C;  $[\alpha]_D^{23} = +32.0$  ( $c = 0.47$ ,  $\text{CH}_2\text{Cl}_2$ ); 94% ee, determined by HPLC analysis [Daicel Chiralcel AS-H column,  $n$ -hexane/ $i$ -PrOH = 85:15, 1.0 mL/min, 220 nm;  $t$  (minor) = 26.34 min,  $t$  (major)= 33.62 min];  $^1\text{H}$  NMR (300 MHz,  $\text{CDCl}_3$ ):  $\delta$  8.00 (br s, 1H), 7.41 (d,  $J = 7.5$  Hz, 1H), 7.30 (d,  $J = 5.1$  Hz, 1H), 7.24-7.20 (m, 2H), 7.14 (dt,  $J = 1.1, 8.1$  Hz, 1H), 7.03 (dd,  $J = 1.0, 8.0$  Hz, 1H), 6.99 (d,  $J = 2.1$  Hz, 1H), 6.82-6.78 (m, 2H), 4.87 (t,  $J = 7.6$  Hz, 1H), 3.76 (s, 3H), 3.74 (s, 3H,  $\text{OCH}_3$ ), 3.65 (dd,  $J = 7.1, 16.9$  Hz, 1H), 3.56 (dd,  $J = 8.0, 16.9$  Hz, 1H) ppm.  $^{13}\text{C}$  NMR (75 MHz,  $\text{CDCl}_3$ ):  $\delta$  192.7, 161.3, 158.2, 136.6, 135.3, 128.7, 126.4, 122.3, 121.4, 119.5, 119.4, 118.7, 113.9, 111.1, 55.2, 52.9, 45.8, 37.0 ppm. ESI-HRMS Calcd for  $\text{C}_{20}\text{H}_{20}\text{NO}_4$   $[\text{M} + \text{H}]^+$  338.13868, Found: 338.13892.

**(+)-4-(1H-5-Methylindol-3-yl)-2-oxo-4-phenylbutyric acid methyl ester**

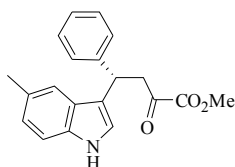

Light yellow solid; 90%yield; Mp: 118-120 °C;  $[\alpha]_D^{23} = +20.90$  ( $c = 0.48$ ,  $\text{CH}_2\text{Cl}_2$ ); 99.6% ee, determined by HPLC analysis [Daicel Chiralcel AD-H column,  $n$ -hexane/ $i$ -PrOH = 80:20, 1.0 mL/min, 220 nm;  $t$  (minor) = 9.82 min,  $t$  (major)= 13.25 min];  $^1\text{H}$  NMR (300 MHz,  $\text{CDCl}_3$ ):  $\delta$  7.90 (br s, 1H), 7.34-7.16 (m, 7H), 6.98-6.93 (m, 2H), 4.88 (t,  $J = 7.6$  Hz, 1H), 3.75 (s, 3H,  $\text{OCH}_3$ ), 3.66 (dd,  $J = 7.3, 17.0$  Hz, 1H), 3.58 (dd,  $J = 7.2, 16.3$  Hz, 1H) ppm.  $^{13}\text{C}$  NMR (75 MHz,  $\text{CDCl}_3$ ):  $\delta$  192.6, 161.3, 143.2, 134.9, 128.7, 128.5, 127.7, 126.6, 126.5, 123.9, 121.7, 118.9, 117.6, 110.8, 52.8, 45.7, 37.7, 21.5 ppm. ESI-HRMS Calcd for  $\text{C}_{20}\text{H}_{20}\text{NO}_3$   $[\text{M} + \text{H}]^+$  322.14377, Found: 322.14362.

**(+)-4-(1H-7-Methylindol-3-yl)-2-oxo-4-phenylbutyric acid methyl ester**

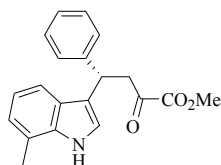

Light yellow solid; 92%yield; Mp:89-90 °C;  $[\alpha]_D^{23} = +58.90$  ( $c = 0.29$ ,  $\text{CH}_2\text{Cl}_2$ ); 97% ee, determined by HPLC analysis [Daicel Chiralcel AD-H column,  $n$ -hexane/ $i$ -PrOH = 80:20, 1.0 mL/min, 220 nm;  $t$  (minor) = 8.39 min,  $t$  (major)= 11.14 min];  $^1\text{H}$  NMR (300 MHz,  $\text{CDCl}_3$ ):  $\delta$  7.93 (br s, 1H), 7.33-7.15 (m, 6H), 7.01-6.93 (m, 3H), 4.90 (t,  $J = 7.5$  Hz, 1H), 3.75 (s, 3H,  $\text{OCH}_3$ ), 3.68 (dd,  $J = 7.4$ , 17.0 Hz, 1H), 3.59 (dd,  $J = 7.8$ , 17.0 Hz, 1H), 2.42 (s, 3H) ppm.  $^{13}\text{C}$  NMR (75 MHz,  $\text{CDCl}_3$ ):  $\delta$  192.7, 161.4, 143.3, 136.2, 128.5, 127.8, 126.6, 126.0, 122.8, 121.3, 120.3, 119.8, 118.8, 117.1, 52.9, 45.7, 37.9, 16.5 ppm. ESI-HRMS Calcd for  $\text{C}_{20}\text{H}_{20}\text{NO}_3$   $[\text{M} + \text{H}]^+$  322.14377, Found: 322.14375.

**(-)-4-(1H-5-Methoxyindol-3-yl)-2-oxo-4-phenylbutyric acid methyl ester**

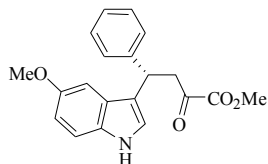

Light yellow oil; 94%yield;  $[\alpha]_D^{23} = -22.0$  ( $c = 0.35$ ,  $\text{CHCl}_3$ ); 99% ee, determined by HPLC analysis [Daicel Chiralcel AD-H column,  $n$ -hexane/ $i$ -PrOH = 80:20, 1.0 mL/min, 220 nm;  $t$  (minor) = 14.983 min,  $t$  (major)= 22.635 min];  $^1\text{H}$  NMR (300 MHz,  $\text{CDCl}_3$ ):  $\delta$  7.95 (br s, 1H), 7.33-7.17 (m, 6H), 6.97 (d,  $J = 2.1$  Hz, 1H), 6.82-6.78 (m, 2H), 4.86 (t,  $J = 7.5$  Hz, 1H), 3.76 (s, 3H), 3.74 (s, 3H,  $\text{OCH}_3$ ), 3.67 (dd,  $J = 7.4$ , 17.1 Hz, 1H), 3.58 (dd,  $J = 7.8$ , 17.0 Hz, 1H) ppm.  $^{13}\text{C}$  NMR (75 MHz,  $\text{CDCl}_3$ ):  $\delta$  192.6, 161.3, 153.8, 143.1, 131.7, 128.5, 127.7, 126.8, 126.6, 122.2, 118.0, 112.3, 111.8, 101.4, 55.8, 52.9, 45.6, 37.7 ppm. ESI-HRMS Calcd for  $\text{C}_{20}\text{H}_{20}\text{NO}_4$   $[\text{M} + \text{H}]^+$  338.13868, Found: 338.13881.

**(-)-4-(1H-5-Chloroindol-3-yl)-2-oxo-4-phenylbutyric acid methyl ester**

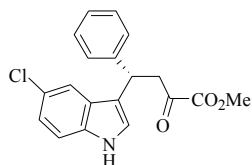

White solid; 90%yield; Mp:105-106 °C;  $[\alpha]_D^{23} = -11.4$  ( $c = 0.44$ ,  $\text{CHCl}_3$ ); 98% ee, determined by HPLC analysis [Daicel Chiralcel OJ-H column,  $n$ -hexane/ $i$ -PrOH = 70:30, 0.9 mL/min, 220 nm;  $t$  (minor) = 62.41 min,  $t$  (major)= 164.07 min];  $^1\text{H}$  NMR (300 MHz,  $\text{CDCl}_3$ ):  $\delta$  8.08 (br s, 1H), 7.37 (d,  $J = 1.9$  Hz, 1H), 7.32-7.16 (m, 6H), 7.10-7.04 (m, 2H), 4.85 (t,  $J = 7.5$  Hz, 1H), 3.78 (s, 3H,  $\text{OCH}_3$ ), 3.65 (dd,  $J = 7.5$ , 17.1 Hz, 1H), 3.57 (dd,  $J = 7.9$ , 17.4 Hz, 1H) ppm.  $^{13}\text{C}$  NMR (75 MHz,  $\text{CDCl}_3$ ):  $\delta$  192.4, 161.2, 142.7, 134.9, 128.6, 127.6, 127.5, 126.8, 125.3, 122.8, 122.7, 118.8, 118.1, 112.2, 53.0, 45.6, 37.5 ppm. ESI-HRMS Calcd for  $\text{C}_{19}\text{H}_{17}\text{ClNO}_3$   $[\text{M} + \text{H}]^+$



342.08915, Found: 342.08910.

**(+)-4-(1H-6-Chloroindol-3-yl)-2-oxo-4-phenylbutyric acid methyl ester**

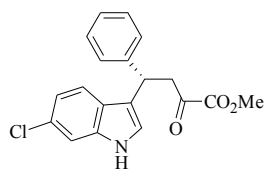

White solid; 90% yield; Mp:164-165 °C;  $[\alpha]_D^{23} = +14.5$  ( $c = 0.34$ ,  $\text{CHCl}_3$ ); 99.5% ee, determined by HPLC analysis [Daicel Chiralcel AD-H column,  $n$ -hexane/ $i$ -PrOH = 80:20, 1.0 mL/min, 220 nm;  $t$  (major) = 15.51 min,  $t$  (minor) = 18.51 min];  $^1\text{H}$  NMR (300 MHz,  $\text{CDCl}_3$ ):  $\delta$  8.04 (br s, 1H), 7.29-7.17 (m, 7H), 7.01-6.95 (m, 2H), 4.86 (t,  $J = 7.5$  Hz, 1H), 3.77 (s, 3H,  $\text{OCH}_3$ ), 3.66 (dd,  $J = 7.5$ , 17.1 Hz, 1H), 3.56 (dd,  $J = 7.6$ , 17.0 Hz, 1H) ppm.  $^{13}\text{C}$  NMR (75 MHz,  $\text{CDCl}_3$ ):  $\delta$  192.5, 161.3, 142.9, 136.9, 128.6, 128.3, 127.7, 126.7, 125.0, 122.1, 120.3, 120.2, 118.5, 111.1, 53.0, 45.5, 37.6 ppm. ESI-HRMS Calcd for  $\text{C}_{19}\text{H}_{17}\text{ClNO}_3$   $[\text{M} + \text{H}]^+$  342.08915, Found: 342.08916.

**(+)-4-(1H-6-Fluoroindol-3-yl)-2-oxo-4-phenylbutyric acid methyl ester**

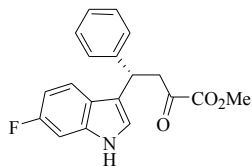

White solid; 86% yield; Mp:121-122 °C;  $[\alpha]_D^{23} = +49.0$  ( $c = 0.29$ ,  $\text{CH}_2\text{Cl}_2$ ); 99.2% ee, determined by HPLC analysis [Daicel Chiralcel AD-H column,  $n$ -hexane/ $i$ -PrOH = 85:15, 0.5 mL/min, 220 nm;  $t$  (minor) = 38.27 min,  $t$  (major) = 39.85 min];  $^1\text{H}$  NMR (300 MHz,  $\text{CDCl}_3$ ):  $\delta$  8.03 (br s, 1H), 7.30-7.15 (m, 7H), 6.99-6.95 (m, 2H), 6.77 (dt,  $J = 2.1$ , 9.5 Hz, 1H), 4.87 (t,  $J = 7.5$  Hz, 1H), 3.77 (s, 3H,  $\text{OCH}_3$ ), 3.66 (dd,  $J = 7.5$ , 17.0 Hz, 1H), 3.56 (dd,  $J = 7.6$ , 17.0 Hz, 1H) ppm.  $^{13}\text{C}$  NMR (75 MHz,  $\text{CDCl}_3$ ):  $\delta$  192.5, 161.7, 161.3, 158.5, 143.0, 136.6, 136.4, 128.6, 127.7, 126.7, 123.0, 121.7, 120.2, 120.1, 118.5, 108.5, 108.2, 97.6, 97.2, 52.9, 45.6, 37.7 ppm. ESI-HRMS Calcd for  $\text{C}_{19}\text{H}_{17}\text{FNO}_3$   $[\text{M} + \text{H}]^+$  326.11870, Found: 326.11878.

**(+)-3-(3-Methoxycarbonyl-3-oxo-1-phenylpropyl)-1H-indole-6-carboxylic acid methyl ester**

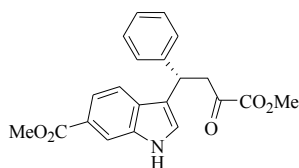

White solid; 81% yield; Mp:170-171 °C;  $[\alpha]_D^{23} = +27.0$  ( $c = 0.10$ ,  $\text{CHCl}_3$ ); 96% ee, determined by HPLC analysis [Daicel Chiralcel AD-H column,  $n$ -hexane/ $i$ -PrOH = 80:20, 1.0 mL/min, 220 nm;  $t$  (minor) = 46.32 min,  $t$  (major) = 61.72 min];  $^1\text{H}$  NMR (300 MHz,  $\text{CDCl}_3$ ):  $\delta$  8.44 (br s, 1H),

8.08-8.06 (m, 1H), 7.70 (dd,  $J = 1.4, 8.4$  Hz, 1H), 7.42 (d,  $J = 8.4$  Hz, 1H), 7.33-7.16 (m, 6H), 4.92 (t,  $J = 7.5$  Hz, 1H), 3.90 (s, 3H), 3.77 (s, 3H), 3.69 (dd,  $J = 7.5, 17.1$  Hz, 1H), 3.60 (dd,  $J = 7.6, 17.1$  Hz, 1H) ppm.  $^{13}\text{C}$  NMR (75 MHz,  $\text{CDCl}_3$ ):  $\delta$  192.4, 168.0, 161.3, 142.8, 135.9, 129.9, 128.6, 127.7, 126.8, 124.8, 124.1, 120.6, 119.0, 118.8, 113.5, 53.0, 51.9, 45.5, 37.6 ppm. ESI-HRMS Calcd for  $\text{C}_{21}\text{H}_{20}\text{NO}_5$   $[\text{M} + \text{H}]^+$  366.13360, Found: 366.13356.

**(+)-4-(1H-Pyrrol-2-yl)-2-oxo-4-phenylbutyric acid methyl ester**

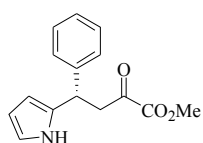

Colorless oil; 95% yield;  $[\alpha]_D^{23} = +58.4$  ( $c = 0.25$ , EtOAc); 92% ee, determined by HPLC analysis [Daicel Chiralcel AD-H column,  $n$ -hexane/ $i$ -PrOH = 95:5, 0.5 mL/min, 220 nm;  $t$  (minor) = 45.54 min,  $t$  (major) = 47.20 min];  $^1\text{H}$  NMR (300 MHz,  $\text{CDCl}_3$ ):  $\delta$  7.93 (br s, 1H), 7.33-7.20 (m, 5H), 6.64-6.62 (m, 1H), 6.10 (dd,  $J = 2.8, 6.0$  Hz, 1H), 5.97-5.94 (m, 1H), 4.61 (t,  $J = 7.2$  Hz, 1H), 3.82 (s, 3H,  $\text{OCH}_3$ ), 3.68 (dd,  $J = 7.7, 18.1$  Hz, 1H), 3.46 (dd,  $J = 6.7, 18.1$  Hz, 1H) ppm.  $^{13}\text{C}$  NMR (75 MHz,  $\text{CDCl}_3$ ):  $\delta$  192.5, 161.1, 141.9, 133.1, 128.8, 127.9, 127.1, 117.4, 108.1, 105.5, 53.0, 45.5, 39.0 ppm. ESI-HRMS Calcd for  $\text{C}_{15}\text{H}_{16}\text{NO}_3$   $[\text{M} + \text{H}]^+$  258.11247, Found: 258.11266.

**(+)-4-(1H-Pyrrol-2-yl)-2-oxo-4-(4-fluorophenyl)butyric acid methyl ester**

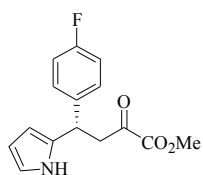

Colorless oil; 90% yield;  $[\alpha]_D^{23} = +56.7$  ( $c = 0.30$ , EtOAc); 92% ee, determined by HPLC analysis [Daicel Chiralcel AD-H column,  $n$ -hexane/ $i$ -PrOH = 98:2, 0.5 mL/min, 220 nm;  $t$  (minor) = 122.05 min,  $t$  (major) = 126.71 min];  $^1\text{H}$  NMR (300 MHz,  $\text{CDCl}_3$ ):  $\delta$  7.96 (br s, 1H), 7.22-7.17 (m, 2H), 7.00-6.95 (m, 2H), 6.66-6.63 (m, 1H), 6.10 (dd,  $J = 2.70, 6.10$  Hz, 1H), 5.95-5.93 (m, 1H), 4.59 (t,  $J = 7.2$  Hz, 1H), 3.82 (s, 3H), 3.65 (dd,  $J = 7.5, 18.2$  Hz, 1H), 3.44 (dd,  $J = 6.9, 18.2$  Hz, 1H) ppm.  $^{13}\text{C}$  NMR (75 MHz,  $\text{CDCl}_3$ ):  $\delta$  192.3, 163.4, 161.0, 160.1, 137.8, 137.7, 132.9, 129.4, 129.3, 117.6, 115.7, 115.4, 108.2, 105.6, 53.0, 45.5, 38.2 ppm. ESI-HRMS Calcd for  $\text{C}_{15}\text{H}_{15}\text{FNO}_3$   $[\text{M} + \text{H}]^+$  276.10305, Found: 276.10338.

**(+)-4-(1H-Pyrrol-2-yl)-2-oxo-4-(4-chlorophenyl)butyric acid methyl ester**

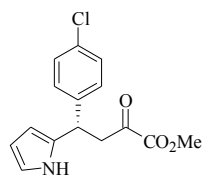

Colorless oil; 96% yield;  $[\alpha]_D^{23} = +55.0$  ( $c = 0.28$ , EtOAc); 90% ee, determined by HPLC analysis [Daicel Chiralcel AD-H column, *n*-hexane/*i*-PrOH = 95:5, 0.5 mL/min, 220 nm;  $t$  (major) = 58.55 min,  $t$  (minor) = 63.67 min],  $^1\text{H}$  NMR (300 MHz,  $\text{CDCl}_3$ ):  $\delta$  7.96 (br s, 1H), 7.29-7.25 (m, 2H), 7.19-7.14 (m, 2H), 6.66-6.64 (m, 1H), 6.11 (dd,  $J = 2.8, 6.0$  Hz, 1H), 5.96-5.93 (m, 1H), 4.58 (t,  $J = 7.2$  Hz, 1H), 3.83 (s, 3H), 3.65 (dd,  $J = 7.5, 18.3$  Hz, 1H), 3.44 (dd,  $J = 6.9, 18.3$  Hz, 1H) ppm.  $^{13}\text{C}$  NMR (75 MHz,  $\text{CDCl}_3$ ):  $\delta$  192.2, 160.9, 140.5, 132.8, 132.6, 129.2, 128.8, 117.7, 108.2, 105.7, 53.0, 45.3, 38.3 ppm. ESI-HRMS Calcd for  $\text{C}_{15}\text{H}_{15}\text{ClNO}_3$   $[\text{M} + \text{H}]^+$  292.07350, Found: 292.07380.

**(+)-4-(1H-Pyrrol-2-yl)-2-oxo-4-(4-bromophenyl)butyric acid methyl ester**

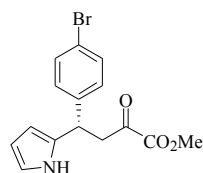

Colorless oil; 96% yield;  $[\alpha]_D^{23} = +34.3$  ( $c = 0.35$ , EtOAc); 90% ee, determined by HPLC analysis [Daicel Chiralcel AD-H column, *n*-hexane/*i*-PrOH = 95:5, 0.5 mL/min, 220 nm;  $t$  (major) = 61.04 min,  $t$  (minor) = 68.43 min];  $^1\text{H}$  NMR (300 MHz,  $\text{CDCl}_3$ ):  $\delta$  7.95 (brs, 1H), 7.44-7.40 (m, 2H), 7.14-7.09 (m, 2H), 6.66-6.64 (m, 1H), 6.11 (dd,  $J = 2.8, 6.1$  Hz, 1H), 5.96-5.93 (m, 1H), 4.57 (t,  $J = 7.2$  Hz, 1H), 3.83 (s, 3H), 3.65 (dd,  $J = 7.5, 18.4$  Hz, 1H), 3.44 (dd,  $J = 6.9, 18.3$  Hz, 1H) ppm.  $^{13}\text{C}$  NMR (75 MHz,  $\text{CDCl}_3$ ):  $\delta$  192.2, 160.9, 141.1, 132.5, 131.8, 129.6, 120.9, 117.7, 108.2, 105.7, 53.1, 45.3, 38.4 ppm. ESI-HRMS Calcd for  $\text{C}_{15}\text{H}_{15}\text{BrNO}_3$   $[\text{M} + \text{H}]^+$  336.02298, Found: 336.02375.

**(+)-4-(1H-Pyrrol-2-yl)-2-oxo-4-(4-cyanophenyl)butyric acid methyl ester**

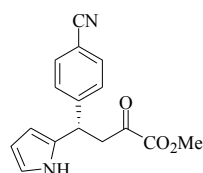

Colorless crystal; 99% yield, Mp: 125~126°C;  $[\alpha]_D^{23} = +53.3$  ( $c = 0.15$ , EtOAc); 91% ee, determined by HPLC analysis [Daicel Chiralcel AD-H column, *n*-hexane/*i*-PrOH = 90:10, 1.0 mL/min, 220 nm;  $t$  (minor) = 35.2 min,  $t$  (major) = 37.2 min];  $^1\text{H}$  NMR (300 MHz,  $\text{CDCl}_3$ ):  $\delta$  8.08 (br s, 1H), 7.58 (d,  $J = 8.3$  Hz, 2H), 7.36 (d,  $J = 8.2$  Hz, 2H), 6.69-6.67 (m, 1H), 6.12 (dd,  $J = 2.8, 5.8$  Hz, 1H), 5.97-5.95 (m, 1H), 4.67 (t,  $J = 7.1$  Hz, 1H), 3.85 (s, 3H), 3.70 (dd,  $J = 7.4, 18.6$  Hz, 1H), 3.46 (dd,  $J = 6.9, 18.6$  Hz, 1H) ppm.  $^{13}\text{C}$  NMR (75 MHz,  $\text{CDCl}_3$ ):  $\delta$  191.7, 160.8, 147.6, 132.5, 131.5, 128.7, 118.5, 118.0, 110.8, 108.3, 106.0, 53.1, 45.0, 38.9 ppm. ESI-HRMS Calcd for  $\text{C}_{16}\text{H}_{15}\text{N}_2\text{O}_3$

$[M + H]^+$  283.10772, Found: 283.10802.

**(+)-4-(1H-Pyrrol-2-yl)-2-oxo-4-(4-nitrophenyl)butyric acid methyl ester**

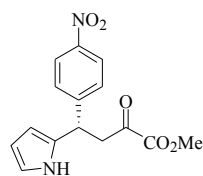

Light yellow oil; 85% yield;  $[\alpha]_D^{23} = +34.0$  ( $c = 0.42$ , EtOAc); 86% ee, determined by HPLC analysis [Daicel Chiralcel AS-H column, *n*-hexane/*i*-PrOH = 75:25, 1.0 mL/min, 220 nm;  $t$  (minor) = 21.94 min,  $t$  (major) = 28.47 min];  $^1\text{H}$  NMR (300 MHz,  $\text{CDCl}_3$ ):  $\delta$  8.17-8.13 (m, 2H), 8.07 (br s, 1H), 7.44-7.39 (m, 2H), 6.70-6.68 (m, 1H), 6.13 (dd,  $J = 2.7, 6.0$  Hz, 1H), 5.99-5.96 (m, 1H), 4.73 (t,  $J = 7.1$  Hz, 1H), 3.86 (s, 3H), 3.74 (dd,  $J = 7.4, 18.7$  Hz, 1H), 3.50 (dd,  $J = 6.8, 18.7$  Hz, 1H) ppm.  $^{13}\text{C}$  NMR (75 MHz,  $\text{CDCl}_3$ ):  $\delta$  191.7, 160.8, 149.6, 147.0, 131.4, 128.8, 124.0, 118.2, 108.5, 106.2, 53.2, 45.1, 38.7 ppm. ESI-HRMS Calcd for  $\text{C}_{15}\text{H}_{15}\text{N}_2\text{O}_5$   $[M + H]^+$  303.09755, Found: 303.09793.

**(+)-4-(1H-Pyrrol-2-yl)-2-oxo-4-(4-trifluoromethyl)butyric acid methyl ester**

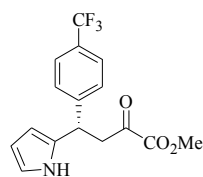

Colorless oil; 97% yield;  $[\alpha]_D^{23} = +48.9$  ( $c = 0.45$ , EtOAc); 88% ee, determined by HPLC analysis [Daicel Chiralcel AD-H column, *n*-hexane/*i*-PrOH = 95:5, 0.5 mL/min, 220 nm;  $t$  (major) = 43.57 min,  $t$  (minor) = 46.51 min];  $^1\text{H}$  NMR (300 MHz,  $\text{CDCl}_3$ ):  $\delta$  8.00 (br s, 1H), 7.55 (d,  $J = 8.1$  Hz, 2H), 7.36 (d,  $J = 8.3$  Hz, 2H), 6.67-6.65 (m, 1H), 6.11 (dd,  $J = 2.8, 6.0$  Hz, 1H), 5.98-5.95 (m, 1H), 4.67 (t,  $J = 7.1$  Hz, 1H), 3.83 (s, 3H), 3.70 (dd,  $J = 7.5, 18.5$  Hz, 1H), 3.47 (dd,  $J = 7.5, 18.5$  Hz, 1H) ppm.  $^{13}\text{C}$  NMR (75 MHz,  $\text{CDCl}_3$ ):  $\delta$  192.0, 160.9, 146.1, 132.1, 129.4 (q,  $J = 32.5$  Hz), 128.3, 125.7 (q,  $J = 3.6$  Hz), 124.0 (q,  $J = 272.1$  Hz), 117.9, 108.3, 106.0, 53.1, 45.2, 38.7 ppm. ESI-HRMS Calcd for  $\text{C}_{16}\text{H}_{15}\text{F}_3\text{NO}_3$   $[M + H]^+$  326.09985, Found: 326.10025.

**(+)-4-(1H-Pyrrol-2-yl)-2-oxo-4-(2-chlorophenyl)butyric acid methyl ester**

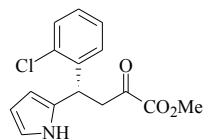

Colorless oil; 90% yield;  $[\alpha]_D^{23} = +42.0$  ( $c = 0.50$ , EtOAc); 85% ee, determined by HPLC analysis [Daicel Chiralcel AD-H column, *n*-hexane/*i*-PrOH = 80:20, 0.5 mL/min, 220 nm;  $t$  (minor) = 120.51 min,  $t$  (major) = 124.17 min];  $^1\text{H}$  NMR (300 MHz,  $\text{CDCl}_3$ ):  $\delta$  8.11 (br s, 1H), 7.38-7.35 (m, 1H),

7.19-7.14 (m, 3H), 6.65-6.63 (m, 1H), 6.10 (dd,  $J = 2.8, 6.0$  Hz, 1H), 5.95-5.93 (m, 1H), 5.12 (dd,  $J = 5.3, 9.2$  Hz, 1H), 3.83 (s, 3H), 3.73 (dd,  $J = 9.2, 18.2$  Hz, 1H), 3.37 (dd,  $J = 5.3, 18.2$  Hz, 1H) ppm.  $^{13}\text{C}$  NMR (75 MHz,  $\text{CDCl}_3$ ):  $\delta$  191.9, 161.0, 139.6, 133.3, 131.8, 129.8, 128.8, 128.2, 127.3, 117.5, 108.1, 105.8, 53.0, 44.2, 35.3 ppm. ESI-HRMS Calcd for  $\text{C}_{15}\text{H}_{15}\text{ClNO}_3$   $[\text{M} + \text{H}]^+$  292.07350, Found: 292.07387.

**(+)-(1H-Pyrrol-2-yl)-2-oxo-4-(3-bromophenyl)butyric acid methyl ester**

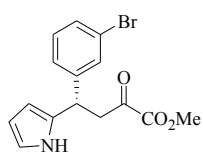

Colorless oil; 94% yield;  $[\alpha]_{\text{D}}^{23} = +41.3$  ( $c = 0.80$ , EtOAc); 90% ee, determined by HPLC analysis [Daicel Chiralcel AD-H column,  $n$ -hexane/ $i$ -PrOH = 95:5, 0.5 mL/min, 220 nm;  $t$  (minor) = 49.52 min,  $t$  (major) = 51.79 min];  $^1\text{H}$  NMR (300 MHz,  $\text{CDCl}_3$ ):  $\delta$  7.97 (br s, 1H), 7.39-7.34 (m, 2H), 7.17 (dd,  $J = 1.6, 3.8$  Hz, 2H), 6.67-6.65 (m, 1H), 6.11 (dd,  $J = 2.8, 6.0$  Hz, 1H), 5.97-5.95 (m, 1H), 4.57 (t,  $J = 7.1$  Hz, 1H), 3.84 (s, 3H), 3.67 (dd,  $J = 7.7, 18.4$  Hz, 1H), 3.44 (dd,  $J = 6.7, 18.4$  Hz, 1H) ppm.  $^{13}\text{C}$  NMR (75 MHz,  $\text{CDCl}_3$ ):  $\delta$  192.0, 160.9, 144.4, 132.2, 130.9, 130.3, 130.2, 126.5, 122.7, 117.8, 108.2, 105.8, 53.1, 45.2, 38.6 ppm. ESI-HRMS Calcd for  $\text{C}_{15}\text{H}_{15}\text{BrNO}_3$   $[\text{M} + \text{H}]^+$  336.02298, Found: 336.02373.

**(+)-4-(1H-Pyrrol-2-yl)-2-oxo-4-(3-cyanophenyl)butyric acid methyl ester**

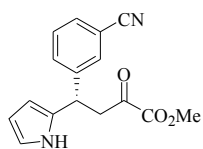

Colorless oil; 90% yield;  $[\alpha]_{\text{D}}^{23} = +38.9$  ( $c = 0.35$ , EtOAc); 88% ee, determined by HPLC analysis [Daicel Chiralcel AS-H column,  $n$ -hexane/ $i$ -PrOH = 90:10, 1.0 mL/min, 220 nm;  $t$  (minor) = 64.16 min,  $t$  (major) = 68.15 min];  $^1\text{H}$  NMR (300 MHz,  $\text{CDCl}_3$ ):  $\delta$  8.08 (br s, 1H), 7.54-7.48 (m, 3H), 7.44-7.38 (m, 1H), 6.70-6.67 (m, 1H), 6.12 (dd,  $J = 2.8, 6.0$  Hz, 1H), 5.97-5.95 (m, 1H), 4.65 (t,  $J = 7.1$  Hz, 1H), 3.86 (s, 3H), 3.71 (dd,  $J = 7.4, 18.6$  Hz, 1H), 3.47 (dd,  $J = 6.9, 18.7$  Hz, 1H) ppm.  $^{13}\text{C}$  NMR (75 MHz,  $\text{CDCl}_3$ ):  $\delta$  191.7, 160.7, 143.8, 132.4, 131.6, 131.4, 130.7, 129.5, 118.5, 118.0, 112.6, 108.3, 106.0, 53.1, 45.0, 38.4 ppm. ESI-HRMS Calcd for  $\text{C}_{16}\text{H}_{15}\text{N}_2\text{O}_3$   $[\text{M} + \text{H}]^+$  283.10772, Found: 283.10812.

**(+)-4-(1H-Pyrrol-2-yl)-2-oxo-4-(3-nitrophenyl)butyric acid methyl ester**

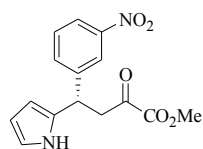

Light yellow oil; 87% yield;  $[\alpha]_D^{23} = +34.5$  ( $c = 0.65$ , EtOAc); 89% ee, determined by HPLC analysis [Daicel Chiralcel AD-H column, *n*-hexane/*i*-PrOH = 95:5, 0.5 mL/min, 220 nm;  $t$  (minor) = 103.69 min,  $t$  (major) = 106.66 min];  $^1\text{H}$  NMR (300 MHz,  $\text{CDCl}_3$ ):  $\delta$  8.14-8.08 (m, 2H), 8.04 (br s, 1H), 7.60 (d,  $J = 7.7$  Hz, 1H), 7.51-7.46 (m, 1H), 6.70-6.68 (m, 1H), 6.13 (dd,  $J = 2.9, 6.0$  Hz, 1H), 5.98-5.96 (m, 1H), 4.73 (t,  $J = 7.1$  Hz, 1H), 3.86 (s, 3H), 3.76 (dd,  $J = 7.6, 18.7$  Hz, 1H), 3.51 (dd,  $J = 6.7, 18.7$  Hz, 1H).  $^{13}\text{C}$  NMR (75 MHz,  $\text{CDCl}_3$ ):  $\delta$  191.8, 160.8, 148.5, 144.3, 134.1, 131.6, 129.7, 122.7, 122.2, 118.1, 108.5, 106.2, 53.2, 45.2, 38.6. ESI-HRMS Calcd for  $\text{C}_{15}\text{H}_{15}\text{N}_2\text{O}_5$   $[\text{M} + \text{H}]^+$  303.09755, Found: 303.09796.

**(+)-4-(1H-Pyrrol-2-yl)-2-oxo-4-(4-methylphenyl)butyric acid methyl ester**

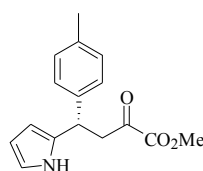

Light yellow oil; 96% yield;  $[\alpha]_D^{23} = +55.3$  ( $c = 0.28$ , EtOAc); 91% ee, determined by HPLC analysis [Daicel Chiralcel AD-H column, *n*-hexane/*i*-PrOH = 97:3, 0.5 mL/min, 220 nm;  $t$  (minor) = 72.52 min,  $t$  (major) = 75.78 min];  $^1\text{H}$  NMR (300 MHz,  $\text{CDCl}_3$ ):  $\delta$  7.91 (br s, 1H), 7.12-7.08 (m, 4H), 6.62-6.59 (m, 1H), 6.09 (dd,  $J = 2.7, 6.0$  Hz, 1H), 5.96-5.93 (m, 1H), 4.57 (t,  $J = 7.3$  Hz, 1H), 3.81 (s, 3H), 3.64 (dd,  $J = 7.6, 18.1$  Hz, 1H), 3.44 (dd,  $J = 6.9, 18.1$  Hz, 1H), 2.30 (s, 3H).  $^{13}\text{C}$  NMR (75 MHz,  $\text{CDCl}_3$ ):  $\delta$  192.5, 161.0, 138.9, 136.6, 133.3, 129.4, 127.7, 117.3, 108.0, 105.3, 52.9, 45.5, 38.6, 20.9. ESI-HRMS Calcd for  $\text{C}_{16}\text{H}_{18}\text{NO}_3$   $[\text{M} + \text{H}]^+$  272.12812, Found: 272.12847.

**(+)-4-(1H-Pyrrol-2-yl)-2-oxo-4-(4-methoxyphenyl)butyric acid methyl ester**

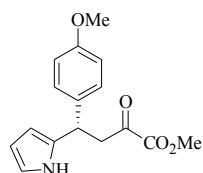

Colorless oil; 82% yield;  $[\alpha]_D^{23} = +45.3$  ( $c = 0.38$ , EtOAc); 88% ee, determined by HPLC analysis [Daicel Chiralcel AD-H column, *n*-hexane/*i*-PrOH = 95:5, 0.5 mL/min, 220 nm;  $t$  (minor) = 71.59 min,  $t$  (major) = 76.06 min];  $^1\text{H}$  NMR (300 MHz,  $\text{CDCl}_3$ ):  $\delta$  7.93 (br s, 1H), 7.17-7.12 (m, 2H), 6.85-6.80 (m, 2H), 6.64-6.61 (m, 1H), 6.10 (dd,  $J = 2.7, 6.0$  Hz, 1H), 5.96-5.93 (m, 1H), 4.56 (t,  $J = 7.2$  Hz, 1H), 3.81 (s, 3H), 3.77 (s, 3H), 3.63 (dd,  $J = 7.5, 18.0$  Hz, 1H), 3.43 (dd,  $J = 7.1, 18.0$  Hz, 1H).  $^{13}\text{C}$  NMR (75 MHz,  $\text{CDCl}_3$ ):  $\delta$  192.6, 161.1, 158.6, 134.0, 133.5, 128.9, 117.3, 114.1, 108.1, 105.3, 55.2, 53.0, 45.6, 38.2. ESI-HRMS Calcd for  $\text{C}_{16}\text{H}_{18}\text{NO}_4$   $[\text{M} + \text{H}]^+$

288.12303, Found: 288.12333.

**(+)-4-(1H-Pyrrol-2-yl)-2-oxo-4-(3-methylphenyl)butyric acid methyl ester**

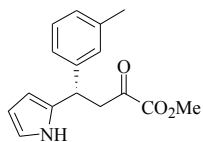

Light yellow oil; 90% yield;  $[\alpha]_D^{23} = +64.6$  ( $c = 0.32$ , EtOAc); 90% ee, determined by HPLC analysis [Daicel Chiralcel AS-H column, *n*-hexane/*i*-PrOH = 90:10, 1.0 mL/min, 220 nm;  $t$  (minor) = 15.46 min,  $t$  (major) = 16.59 min];  $^1\text{H}$  NMR (300 MHz,  $\text{CDCl}_3$ ):  $\delta$  7.92 (br s, 1H), 7.22-7.17 (m, 1H), 7.05-7.03 (m, 3H), 6.64-6.62 (m, 1H), 6.10 (dd,  $J = 2.8, 5.9$  Hz, 1H), 5.97-5.94 (m, 1H), 4.57 (t,  $J = 7.2$  Hz, 1H), 3.82 (s, 3H), 3.67 (dd,  $J = 7.7, 18.1$  Hz, 1H), 3.45 (dd,  $J = 6.7, 18.2$  Hz, 1H), 2.31 (s, 3H).  $^{13}\text{C}$  NMR (75 MHz,  $\text{CDCl}_3$ ):  $\delta$  192.5, 161.1, 141.8, 138.4, 133.2, 128.6, 128.5, 127.8, 124.8, 117.3, 108.1, 105.4, 53.0, 45.4, 38.9, 21.4. ESI-HRMS Calcd for  $\text{C}_{16}\text{H}_{18}\text{NO}_3$   $[\text{M} + \text{H}]^+$  272.12812, Found: 272.12844.

**(+)-4-(1H-Pyrrol-2-yl)-2-oxo-4-(3-methoxyphenyl)butyric acid methyl ester**

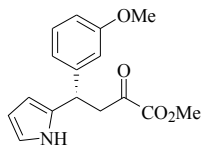

Colorless oil; 86% yield;  $[\alpha]_D^{23} = +56.6$  ( $c = 0.30$ , EtOAc); 92% ee, determined by HPLC analysis [Daicel Chiralcel AD-H column, *n*-hexane/*i*-PrOH = 95:5, 0.5 mL/min, 220 nm;  $t$  (minor) = 72.45 min,  $t$  (major) = 75.50 min];  $^1\text{H}$  NMR (300 MHz,  $\text{CDCl}_3$ ):  $\delta$  7.94 (br s, 1H), 7.25-7.20 (m, 1H), 6.84-6.76 (m, 3H), 6.65-6.63 (m, 1H), 6.10 (dd,  $J = 2.9, 5.9$  Hz, 1H), 5.98-5.96 (m, 1H), 4.59 (t,  $J = 7.2$  Hz, 1H), 3.83 (s, 3H), 3.77 (s, 3H), 3.67 (dd,  $J = 7.7, 18.2$  Hz, 1H), 3.46 (dd,  $J = 6.7, 18.2$  Hz, 1H).  $^{13}\text{C}$  NMR (75 MHz,  $\text{CDCl}_3$ ):  $\delta$  192.3, 161.0, 159.8, 143.5, 132.9, 129.7, 120.1, 117.4, 113.7, 112.2, 108.0, 105.4, 55.1, 52.9, 45.3, 38.9. ESI-HRMS Calcd for  $\text{C}_{16}\text{H}_{18}\text{NO}_4$   $[\text{M} + \text{H}]^+$  288.12303, Found: 288.12325.

## HPLC chromatograms for indole adducts

Daicel Chiralcel AD-H, n-hexane/i-PrOH = 80:20, 1.0 mL/min, 220 nm; t (minor) = 13.41 min, t (major)= 15.84 min]; 99.7%ee

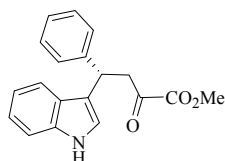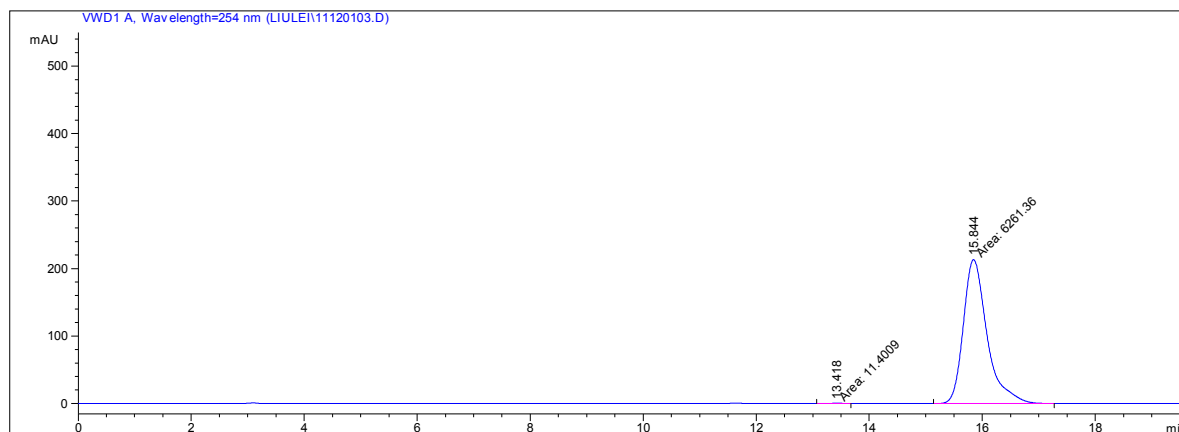

| # | Time   | Area   | Height | Width  | Area%  | Symmetry |
|---|--------|--------|--------|--------|--------|----------|
| 1 | 13.418 | 11.4   | 4.9    | 0.3897 | 0.182  | 0.881    |
| 2 | 15.844 | 6261.4 | 213.6  | 0.4886 | 99.818 | 0.722    |

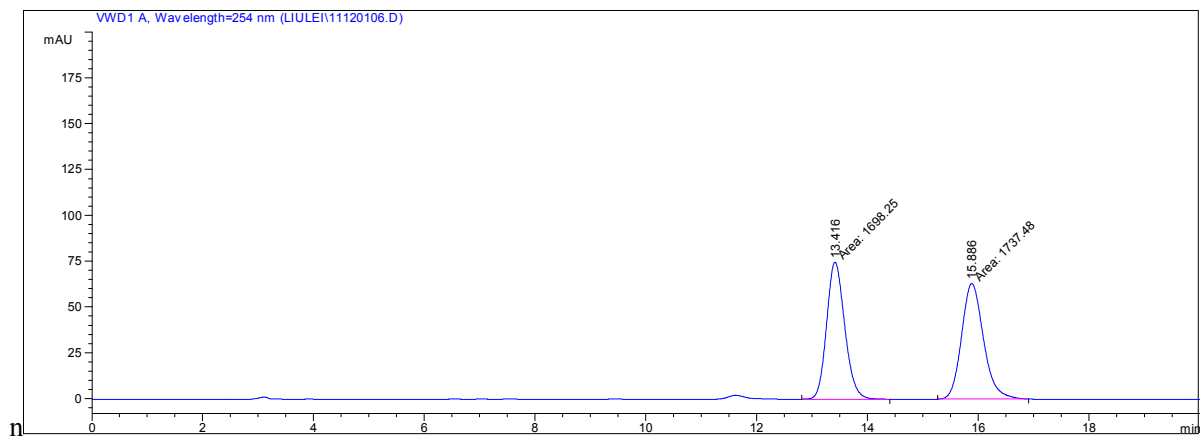

| # | Time   | Area   | Height | Width  | Area%  | Symmetry |
|---|--------|--------|--------|--------|--------|----------|
| 1 | 13.416 | 1698.2 | 74.7   | 0.3787 | 49.429 | 0.83     |
| 2 | 15.886 | 1737.5 | 63     | 0.4594 | 50.571 | 0.84     |



Daicel Chiralcel AD-H column, *n*-hexane/*i*-PrOH = 80:20, 1.0 mL/min, 220 nm; 99.5% ee

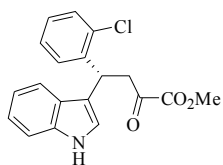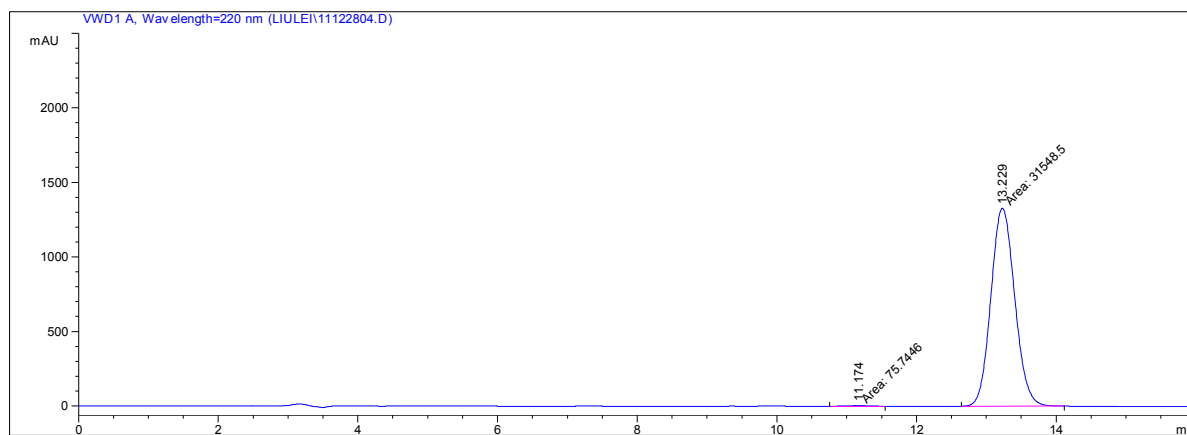

| # | Time   | Area    | Height | Width  | Area%  | Symmetry |
|---|--------|---------|--------|--------|--------|----------|
| 1 | 11.174 | 75.7    | 3.7    | 0.3424 | 0.240  | 1.039    |
| 2 | 13.229 | 31548.5 | 1327.7 | 0.396  | 99.760 | 0.894    |

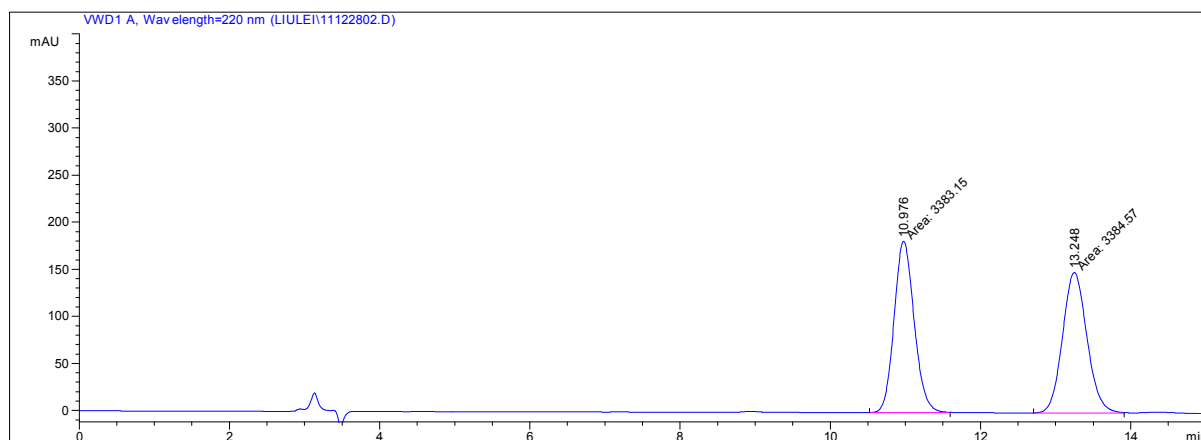

| # | Time   | Area   | Height | Width  | Area%  | Symmetry |
|---|--------|--------|--------|--------|--------|----------|
| 1 | 10.976 | 3383.1 | 181.9  | 0.3099 | 49.990 | 0.866    |
| 2 | 13.248 | 3384.6 | 149.4  | 0.3776 | 50.010 | 0.899    |

Daicel Chiralcel AD-H column), *n*-hexane/*i*-PrOH = 80:20, 1.0 mL/min, 220 nm; 99.7% ee

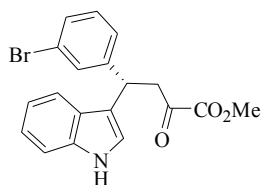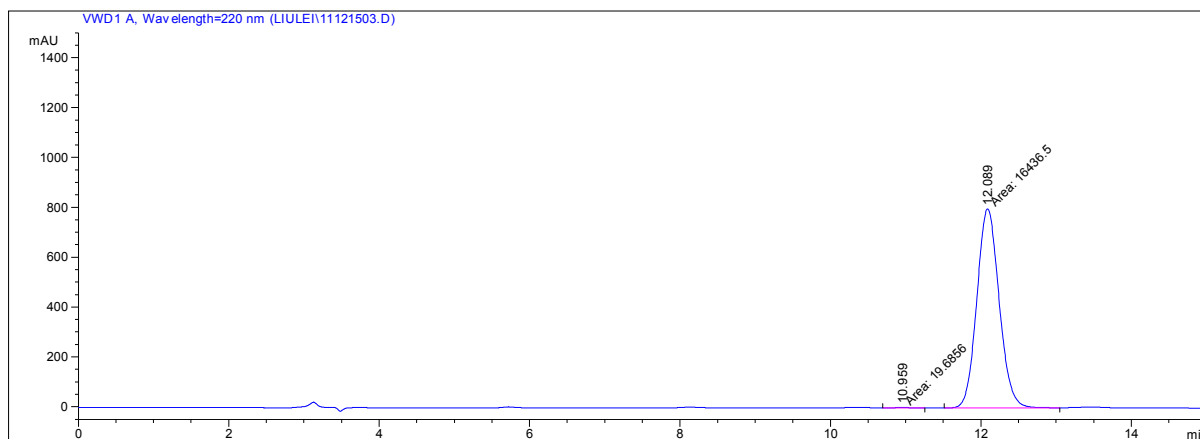

| # | Time   | Area    | Height | Width  | Area%  | Symmetry |
|---|--------|---------|--------|--------|--------|----------|
| 1 | 10.959 | 19.7    | 1.2    | 0.2732 | 0.120  | 0.864    |
| 2 | 12.089 | 16436.5 | 798.2  | 0.3432 | 99.880 | 0.894    |

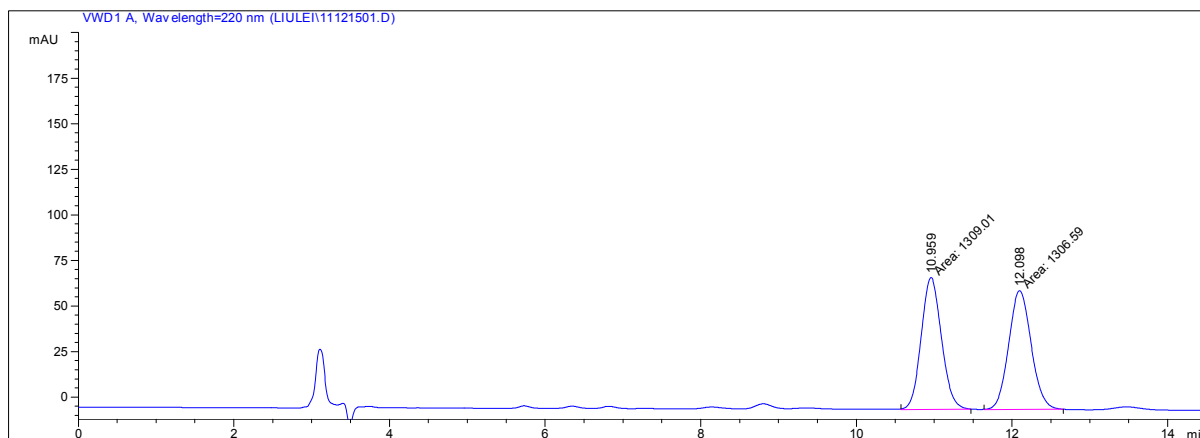

| # | Time   | Area   | Height | Width  | Area%  | Symmetry |
|---|--------|--------|--------|--------|--------|----------|
| 1 | 10.959 | 1309   | 72.4   | 0.3015 | 50.046 | 0.901    |
| 2 | 12.098 | 1306.6 | 65.1   | 0.3343 | 49.954 | 0.917    |

Daicel Chiralcel AD-H column, *n*-hexane / *i*-PrOH = 80:20, 1.0 mL/min, 220 nm; 99.9% ee

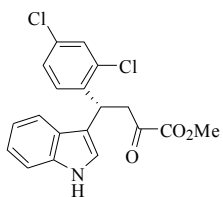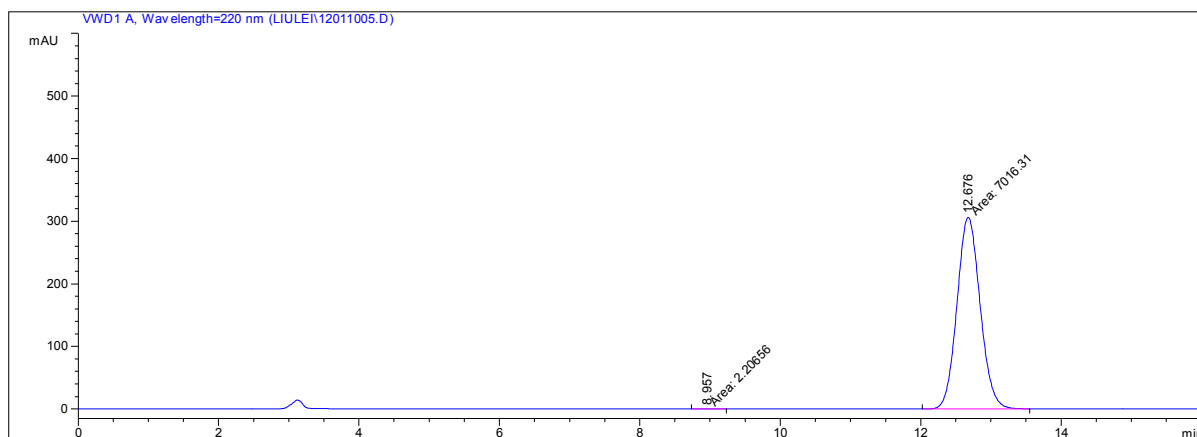

| # | Time   | Area   | Height | Width  | Area%  | Symmetry |
|---|--------|--------|--------|--------|--------|----------|
| 1 | 8.957  | 2.2    | 1.6E-1 | 0.2362 | 0.031  | 0.971    |
| 2 | 12.676 | 7016.3 | 306.3  | 0.3818 | 99.969 | 0.905    |

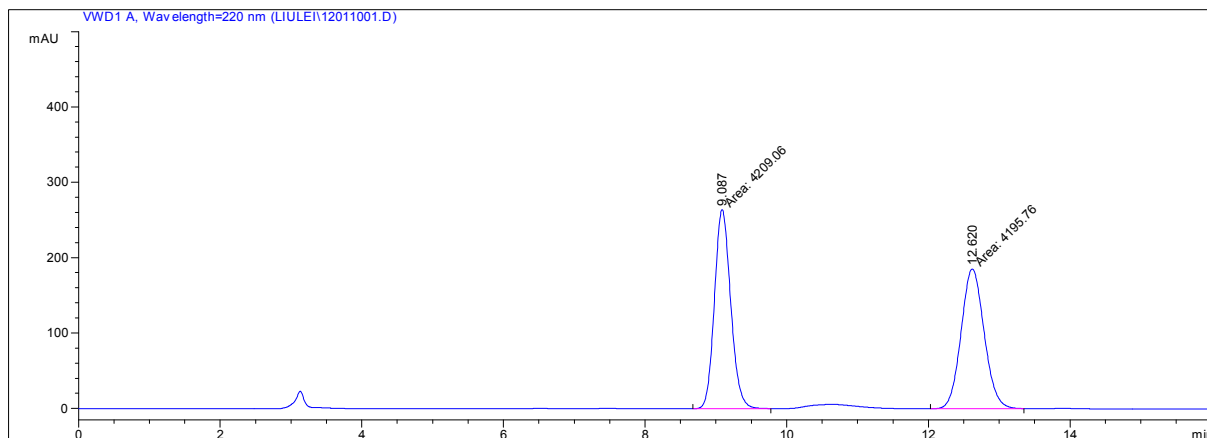

| # | Time  | Area   | Height | Width  | Area%  | Symmetry |
|---|-------|--------|--------|--------|--------|----------|
| 1 | 9.087 | 4209.1 | 264.2  | 0.2655 | 50.079 | 0.861    |
| 2 | 12.62 | 4195.8 | 185.4  | 0.3772 | 49.921 | 0.909    |

Daicel Chiralcel AD-H column, n-hexane/i-PrOH = 80:20, 1.0 mL/min, 220 nm; 99.8% ee

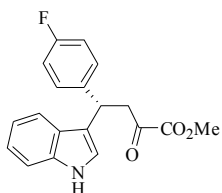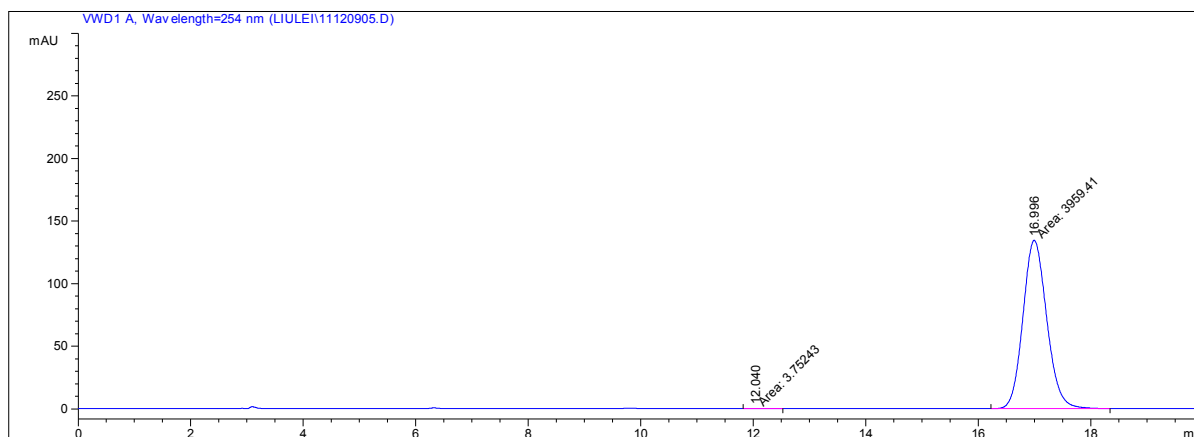

| # | Time   | Area   | Height | Width  | Area%  | Symmetry |
|---|--------|--------|--------|--------|--------|----------|
| 1 | 12.04  | 3.8    | 1.7E-1 | 0.3614 | 0.095  | 0.966    |
| 2 | 16.996 | 3959.4 | 134.5  | 0.4908 | 99.905 | 0.86     |

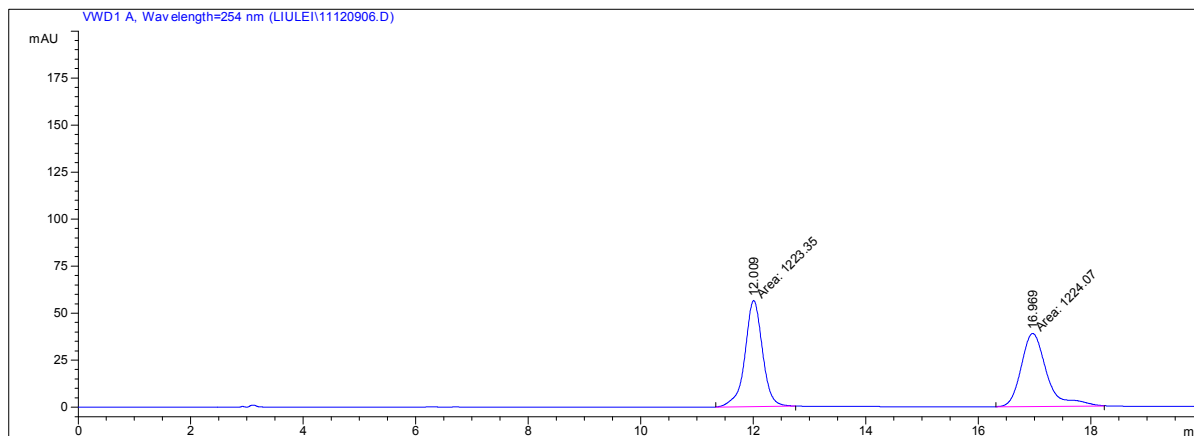

| # | Time   | Area   | Height | Width  | Area%  | Symmetry |
|---|--------|--------|--------|--------|--------|----------|
| 1 | 12.009 | 1223.3 | 56.4   | 0.3617 | 49.985 | 0.978    |
| 2 | 16.969 | 1224.1 | 38.8   | 0.526  | 50.015 | 0.778    |

Daicel Chiralcel AD-H column, *n*-hexane / *i*-PrOH = 80:20, 1.0 mL/min, 220 nm; 99.1% ee

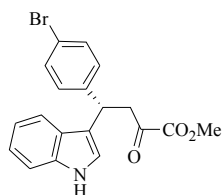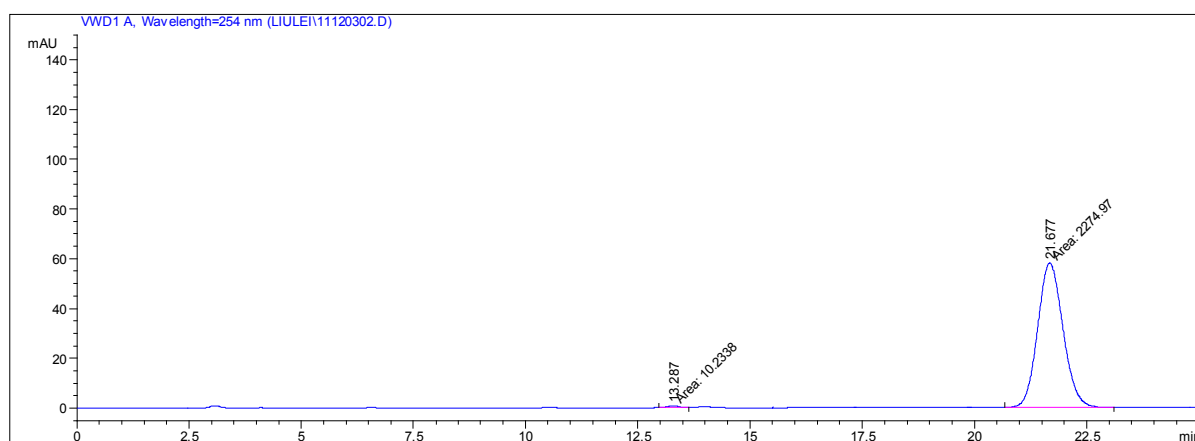

| # | Time   | Area | Height | Width  | Area%  | Symmetry |
|---|--------|------|--------|--------|--------|----------|
| 1 | 13.287 | 10.2 | 5.1E-1 | 0.3351 | 0.448  | 0.968    |
| 2 | 21.677 | 2275 | 58     | 0.6537 | 99.552 | 0.877    |

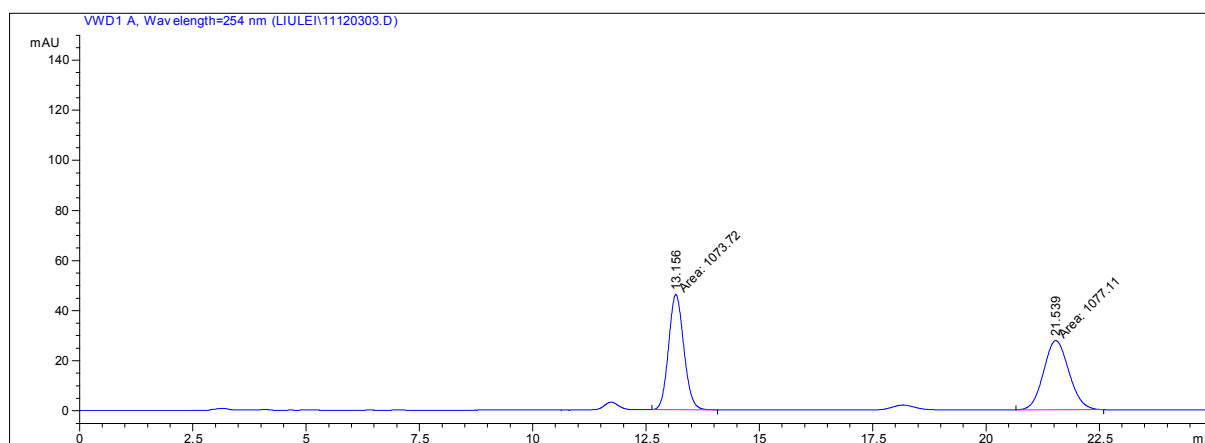

| # | Time   | Area   | Height | Width  | Area%  | Symmetry |
|---|--------|--------|--------|--------|--------|----------|
| 1 | 13.156 | 1073.7 | 46     | 0.389  | 49.921 | 0.88     |
| 2 | 21.539 | 1077.1 | 27.7   | 0.6492 | 50.079 | 0.901    |

Daicel Chiralcel AD-H column, *n*-hexane/*i*-PrOH = 80:20, 1.0 mL/min, 220 nm; 99.7% ee

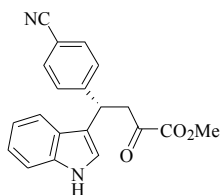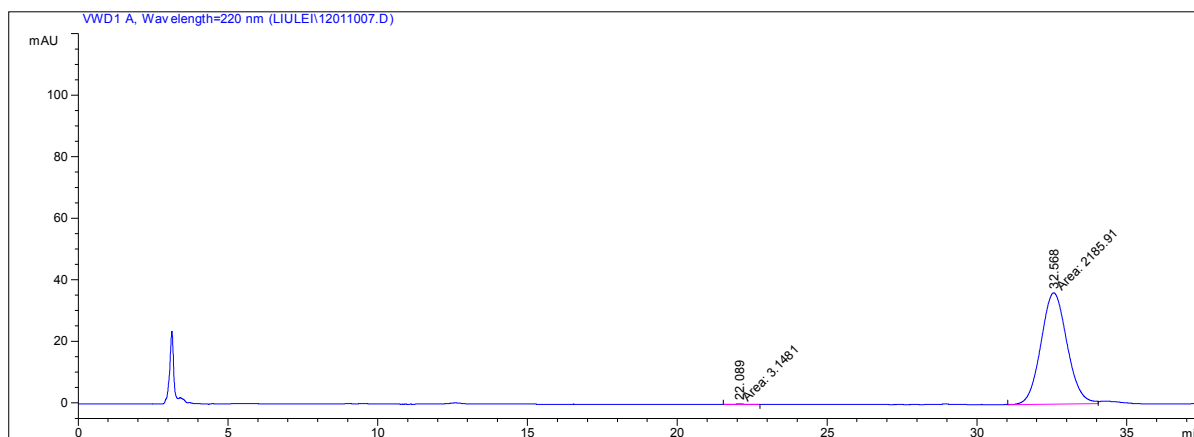

| # | Time   | Area   | Height | Width  | Area%  | Symmetry |
|---|--------|--------|--------|--------|--------|----------|
| 1 | 22.089 | 3.1    | 7.6E-2 | 0.6926 | 0.144  | 0.905    |
| 2 | 32.568 | 2185.9 | 36.1   | 1.0086 | 99.856 | 0.933    |

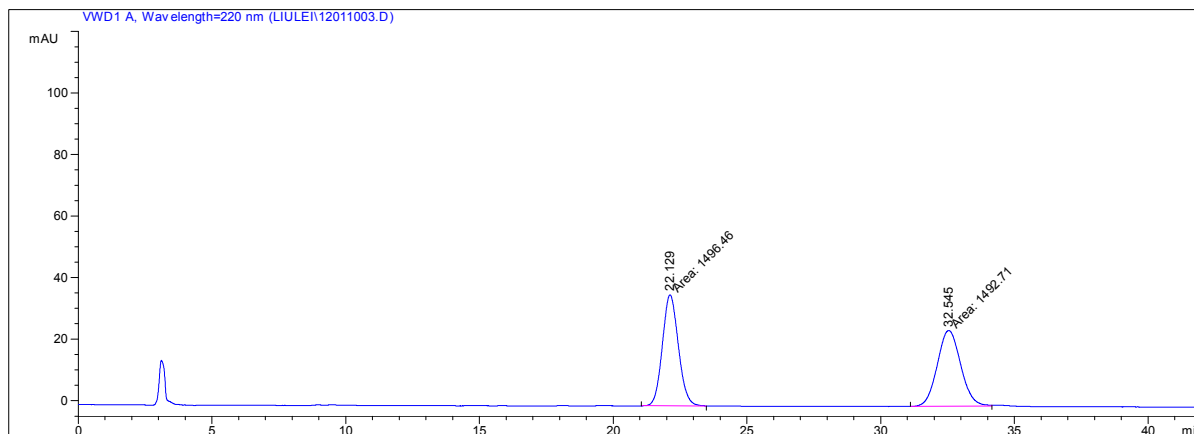

| # | Time   | Area   | Height | Width  | Area%  | Symmetry |
|---|--------|--------|--------|--------|--------|----------|
| 1 | 22.129 | 1496.5 | 36     | 0.692  | 50.063 | 0.893    |
| 2 | 32.545 | 1492.7 | 24.6   | 1.0126 | 49.937 | 0.916    |

Daicel Chiralcel AD-H column, *n*-hexane/*i*-PrOH = 80:20, 1.0 mL/min, 220 nm; 99.7% ee

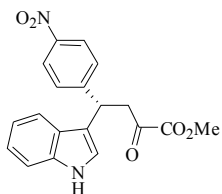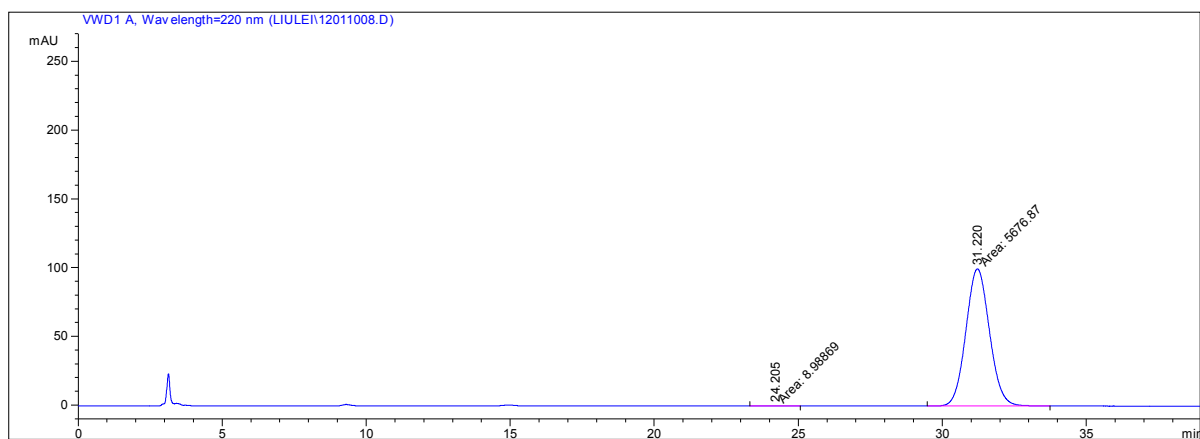

| # | Time   | Area   | Height | Width  | Area%  | Symmetry |
|---|--------|--------|--------|--------|--------|----------|
| 1 | 24.205 | 9      | 1.7E-1 | 0.8947 | 0.158  | 0.832    |
| 2 | 31.22  | 5676.9 | 99.7   | 0.9488 | 99.842 | 0.929    |

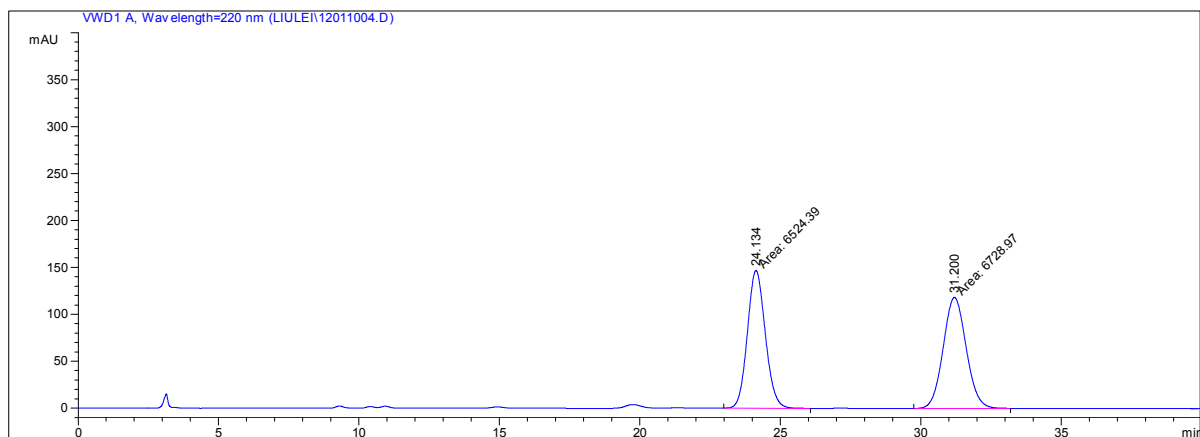

| # | Time   | Area   | Height | Width  | Area%  | Symmetry |
|---|--------|--------|--------|--------|--------|----------|
| 1 | 24.134 | 6524.4 | 146.9  | 0.7403 | 49.228 | 0.888    |
| 2 | 31.2   | 6729   | 118.2  | 0.9491 | 50.772 | 0.925    |

Daicel Chiralcel AD-H column, *n*-hexane / *i*-PrOH = 80:20, 1.0 mL/min, 220 nm; 99.6% ee

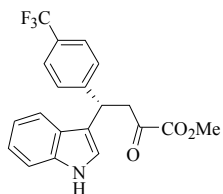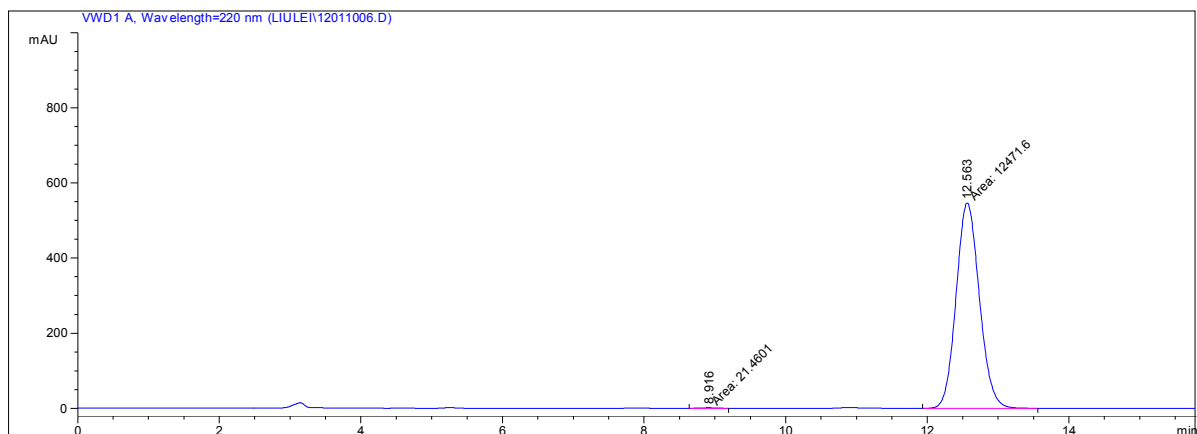

| # | Time   | Area    | Height | Width  | Area%  | Symmetry |
|---|--------|---------|--------|--------|--------|----------|
| 1 | 8.916  | 21.5    | 1.3    | 0.267  | 0.172  | 0.941    |
| 2 | 12.563 | 12471.6 | 546.5  | 0.3804 | 99.828 | 0.885    |

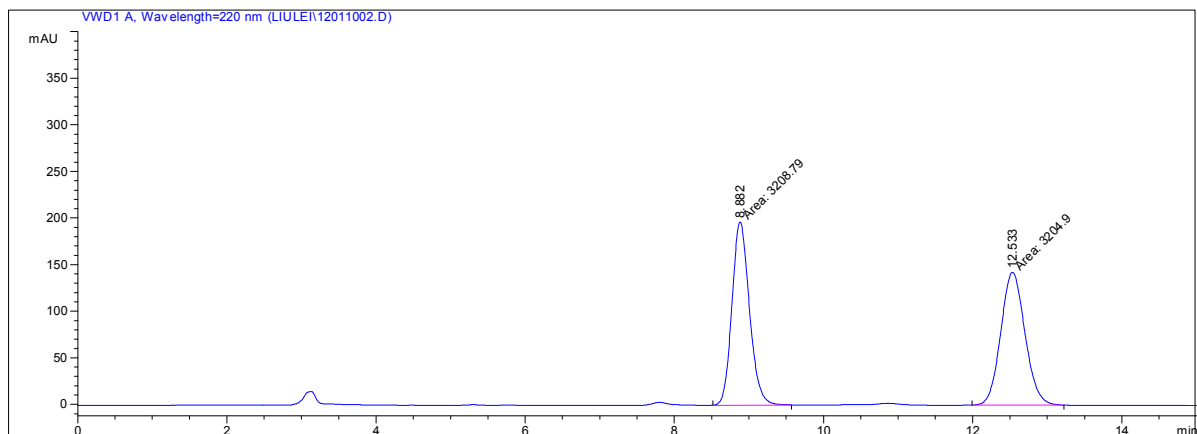

| # | Time   | Area   | Height | Width  | Area%  | Symmetry |
|---|--------|--------|--------|--------|--------|----------|
| 1 | 8.882  | 3208.8 | 196.8  | 0.2718 | 50.030 | 0.839    |
| 2 | 12.533 | 3204.9 | 142.3  | 0.3753 | 49.970 | 0.903    |



Daicel Chiralcel AS-H column, *n*-hexane/*i*-PrOH = 85:15, 1.0 mL/min, 220 nm; 99.3% ee

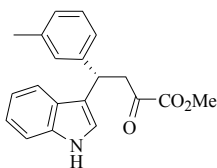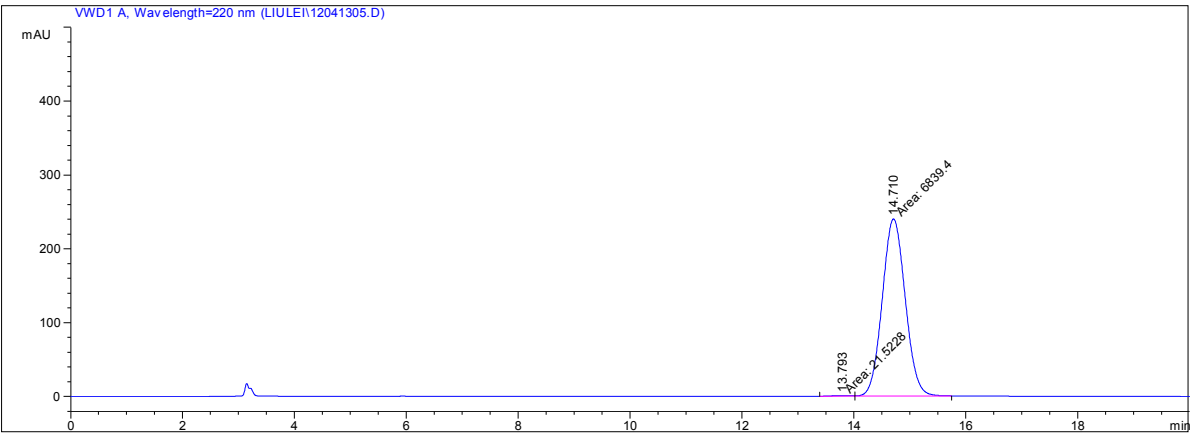

| # | Time   | Area   | Height | Width  | Area%  | Symmetry |
|---|--------|--------|--------|--------|--------|----------|
| 1 | 13.793 | 21.5   | 9.7E-1 | 0.3689 | 0.314  | 1.25     |
| 2 | 14.71  | 6839.4 | 239.9  | 0.4752 | 99.686 | 0.929    |

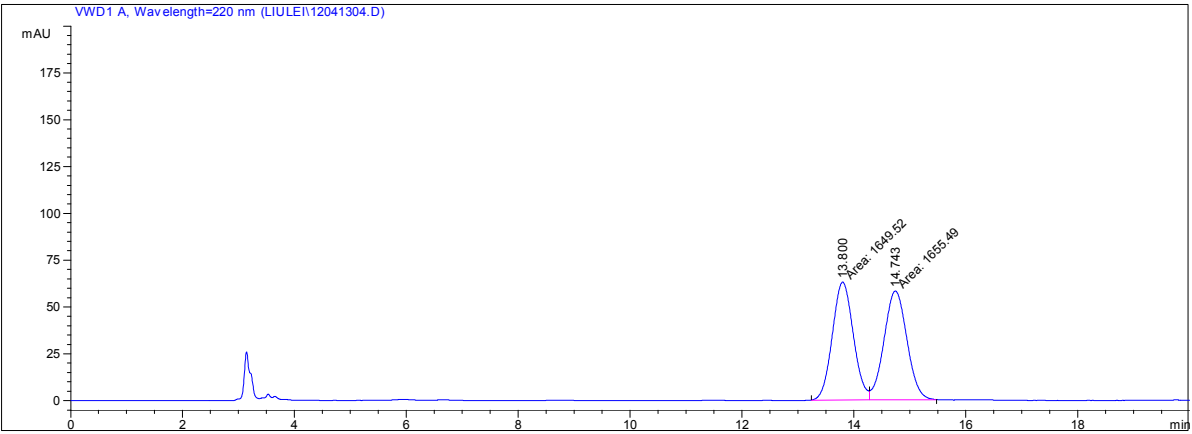

| # | Time   | Area   | Height | Width  | Area%  | Symmetry |
|---|--------|--------|--------|--------|--------|----------|
| 1 | 13.8   | 1649.5 | 63     | 0.4365 | 49.910 | 0.933    |
| 2 | 14.743 | 1655.5 | 58.1   | 0.4745 | 50.090 | 0.953    |

Daicel Chiralcel AD-H column, *n*-hexane/*i*-PrOH = 80:20, 1.0 mL/min, 220 nm; 99.2% ee

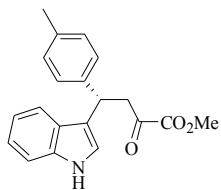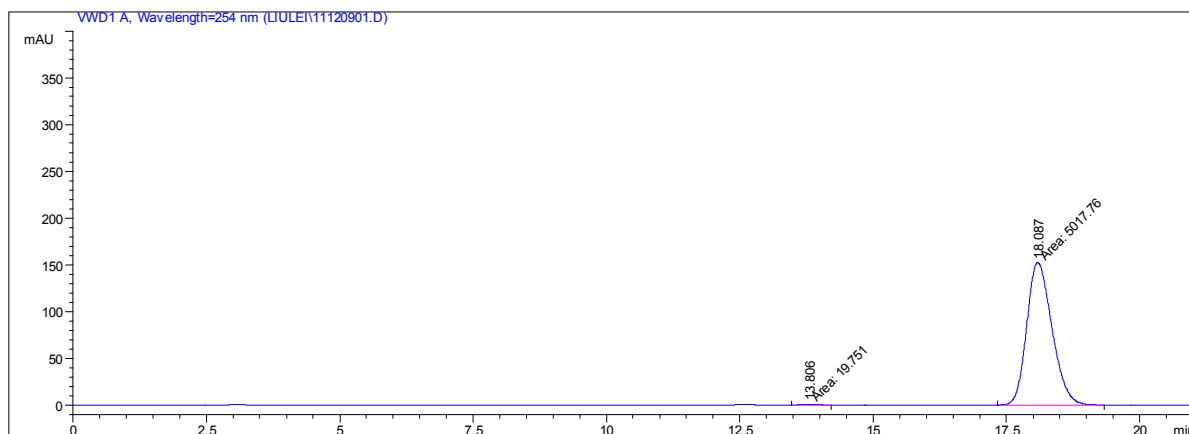

| # | Time   | Area   | Height | Width  | Area%  | Symmetry |
|---|--------|--------|--------|--------|--------|----------|
| 1 | 13.806 | 19.8   | 9.1    | 0.3648 | 0.392  | 0.888    |
| 2 | 18.087 | 5017.8 | 152.4  | 0.5487 | 99.608 | 0.749    |

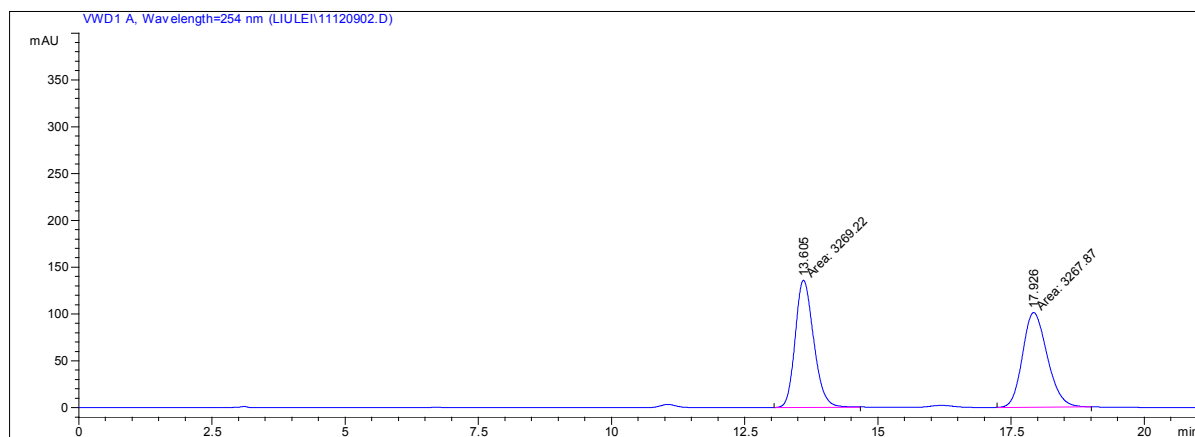

| # | Time   | Area   | Height | Width  | Area%  | Symmetry |
|---|--------|--------|--------|--------|--------|----------|
| 1 | 13.605 | 3269.2 | 135.7  | 0.4016 | 50.010 | 0.783    |
| 2 | 17.926 | 3267.9 | 101.2  | 0.5384 | 49.990 | 0.792    |

Daicel Chiralcel AS-H column, *n*-hexane / *i*-PrOH = 85:15, 1.0 mL/min, 220 nm; 94% ee

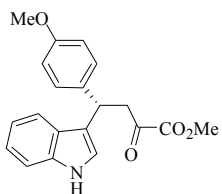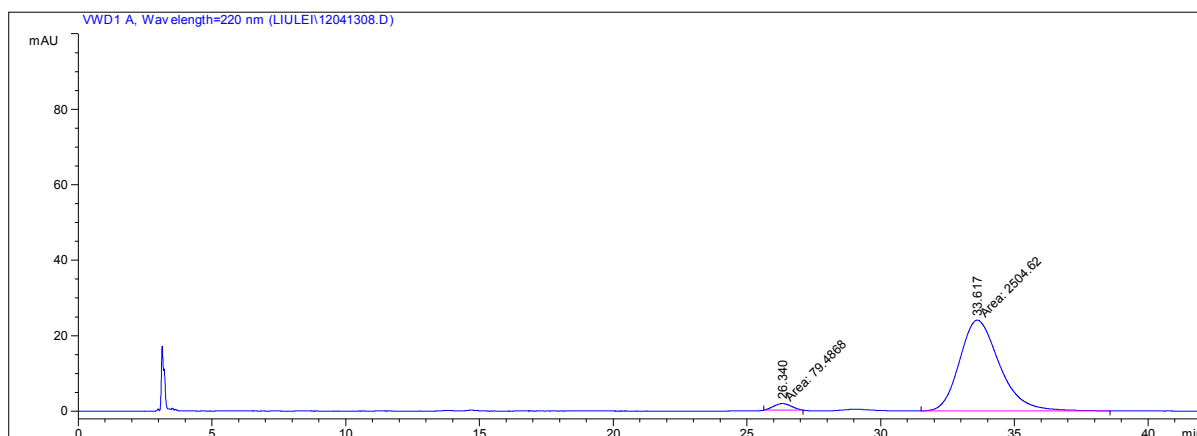

| # | Time   | Area   | Height | Width  | Area%  | Symmetry |
|---|--------|--------|--------|--------|--------|----------|
| 1 | 26.34  | 79.5   | 1.7    | 0.7708 | 3.076  | 1.007    |
| 2 | 33.617 | 2504.6 | 24.1   | 1.7338 | 96.924 | 0.767    |

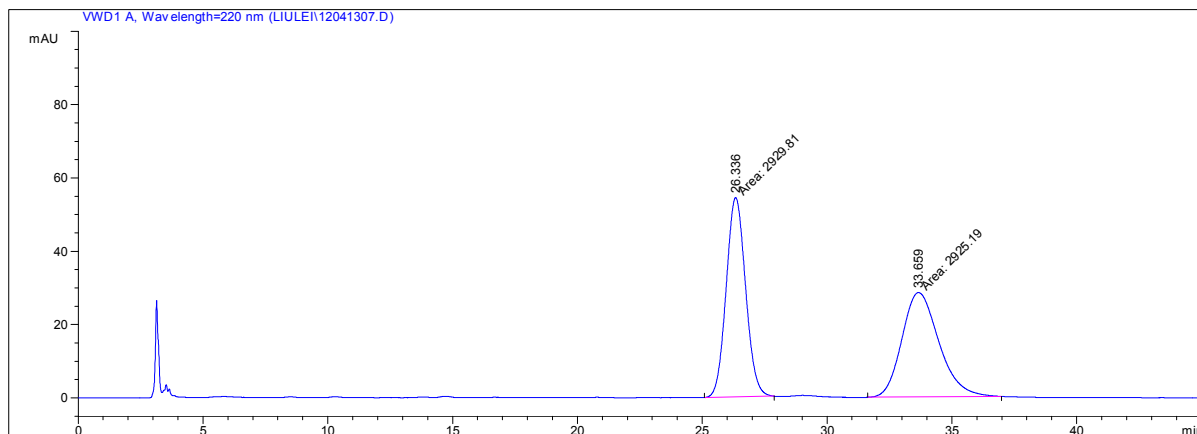

| # | Time   | Area   | Height | Width  | Area%  | Symmetry |
|---|--------|--------|--------|--------|--------|----------|
| 1 | 26.336 | 2929.8 | 54.3   | 0.8987 | 50.039 | 0.916    |
| 2 | 33.659 | 2925.2 | 28.4   | 1.7154 | 49.961 | 0.778    |

Daicel Chiralcel AD-H column, *n*-hexane/*i*-PrOH = 80:20, 1.0 mL/min, 220 nm; 99.6% ee

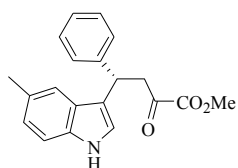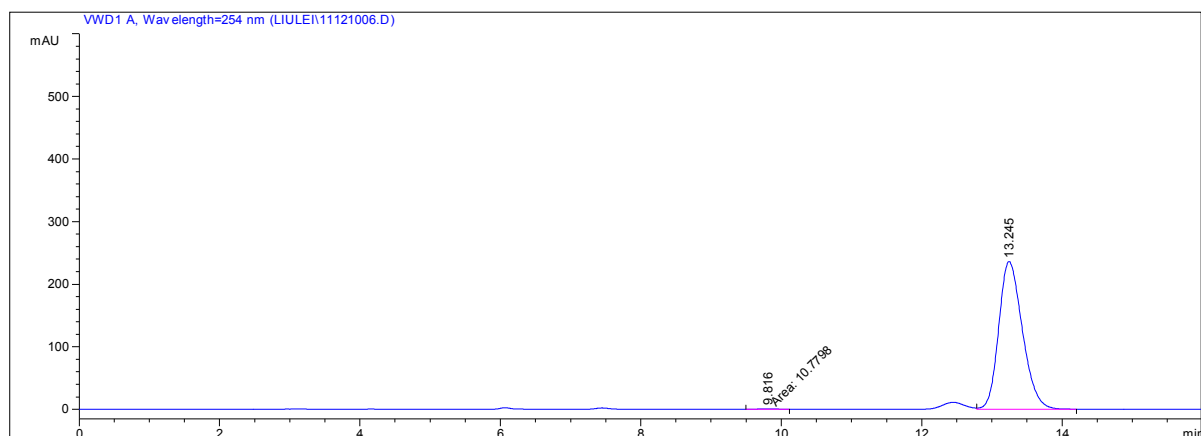

| # | Time   | Area   | Height | Width  | Area%  | Symmetry |
|---|--------|--------|--------|--------|--------|----------|
| 1 | 9.816  | 10.8   | 6.2E-1 | 0.2904 | 0.195  | 0.999    |
| 2 | 13.245 | 5531.3 | 236    | 0.3622 | 99.805 | 0.741    |

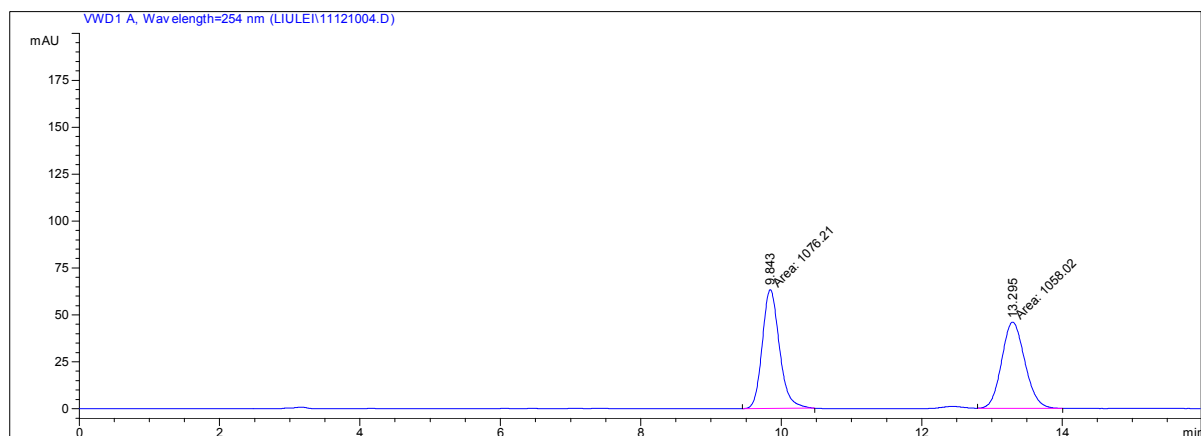

| # | Time   | Area   | Height | Width  | Area%  | Symmetry |
|---|--------|--------|--------|--------|--------|----------|
| 1 | 9.843  | 1076.2 | 63.3   | 0.2833 | 50.426 | 0.83     |
| 2 | 13.295 | 1058   | 46     | 0.3832 | 49.574 | 0.87     |

Daicel Chiralcel AD-H column, *n*-hexane/*i*-PrOH = 80:20, 1.0 mL/min, 220 nm; 97% ee

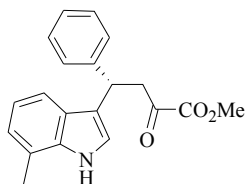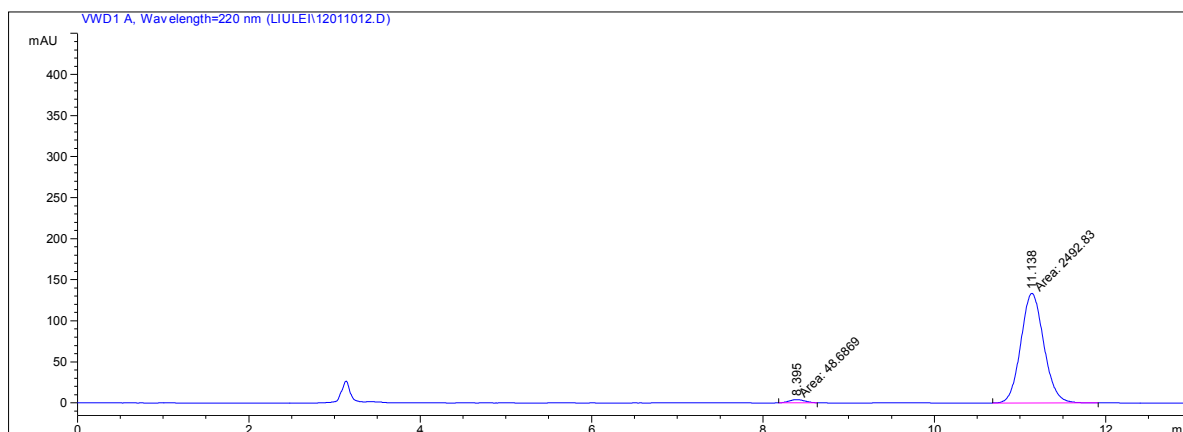

| # | Time   | Area   | Height | Width  | Area%  | Symmetry |
|---|--------|--------|--------|--------|--------|----------|
| 1 | 8.395  | 48.7   | 3.9    | 0.2096 | 1.516  | 0.901    |
| 2 | 11.138 | 2492.8 | 133.4  | 0.3115 | 98.484 | 0.896    |

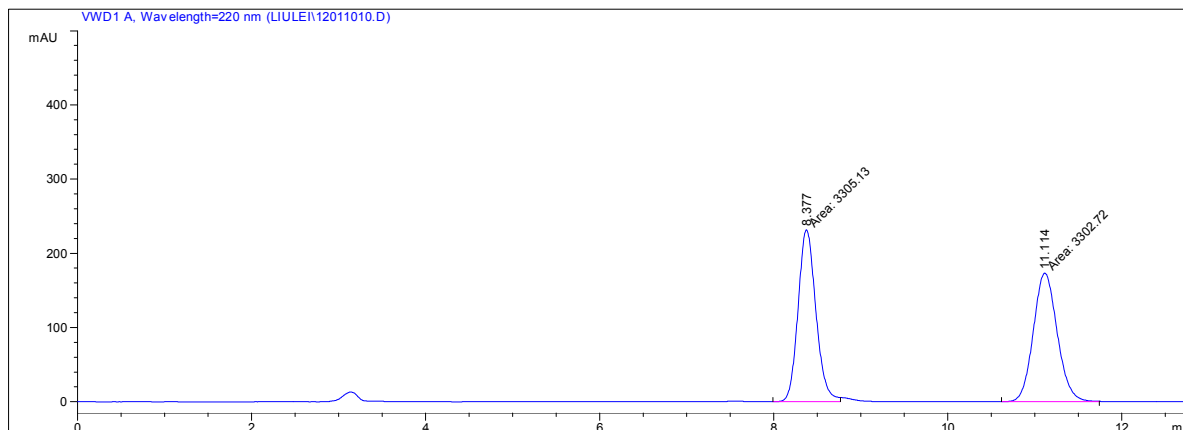

| # | Time   | Area   | Height | Width  | Area%  | Symmetry |
|---|--------|--------|--------|--------|--------|----------|
| 1 | 8.377  | 3305.1 | 231.7  | 0.2378 | 50.018 | 0.854    |
| 2 | 11.114 | 3302.7 | 173.2  | 0.3177 | 49.982 | 0.892    |

Daicel Chiralcel AD-H column, *n*-hexane/*i*-PrOH = 80:20, 1.0 mL/min, 220 nm; 98.6% ee

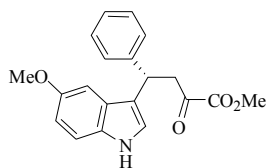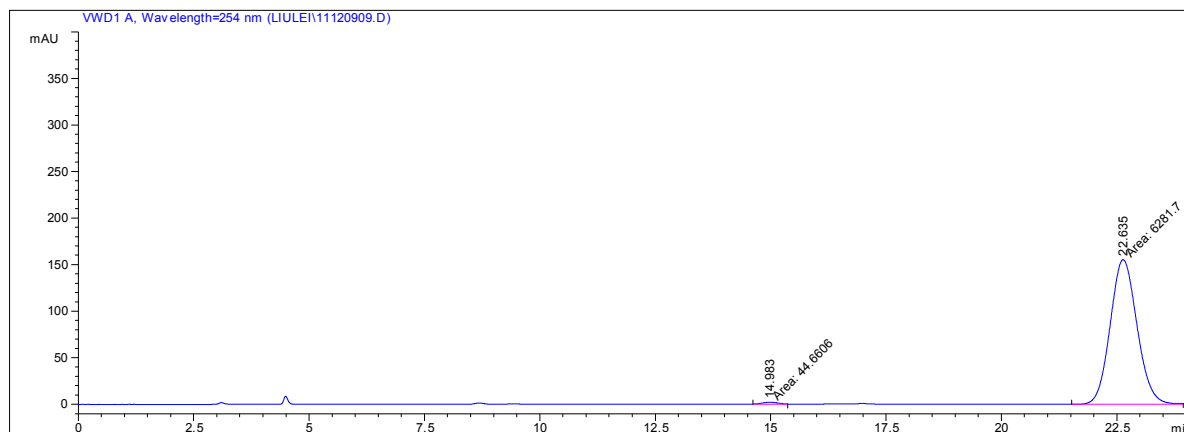

| # | Time   | Area   | Height | Width  | Area%  | Symmetry |
|---|--------|--------|--------|--------|--------|----------|
| 1 | 14.983 | 44.7   | 1.9    | 0.3944 | 0.706  | 0.959    |
| 2 | 22.635 | 6281.7 | 155.3  | 0.674  | 99.294 | 0.89     |

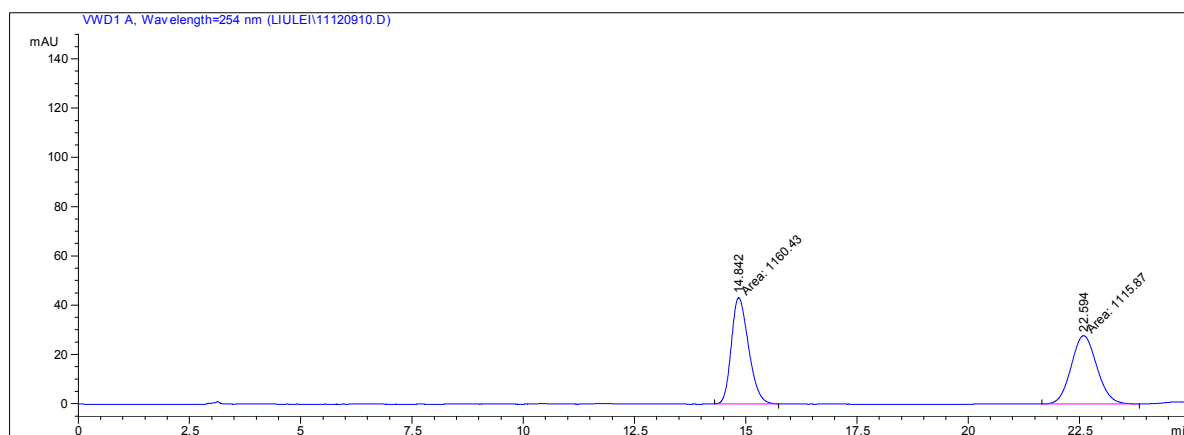

| # | Time   | Area   | Height | Width  | Area%  | Symmetry |
|---|--------|--------|--------|--------|--------|----------|
| 1 | 14.842 | 1160.4 | 43.1   | 0.4488 | 50.979 | 0.727    |
| 2 | 22.594 | 1115.9 | 27.8   | 0.6702 | 49.021 | 0.913    |

Daicel Chiralcel OJ-H column, *n*-hexane / *i*-PrOH = 70:30, 0.9 mL/min, 220 nm; 98% ee

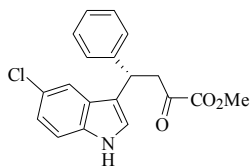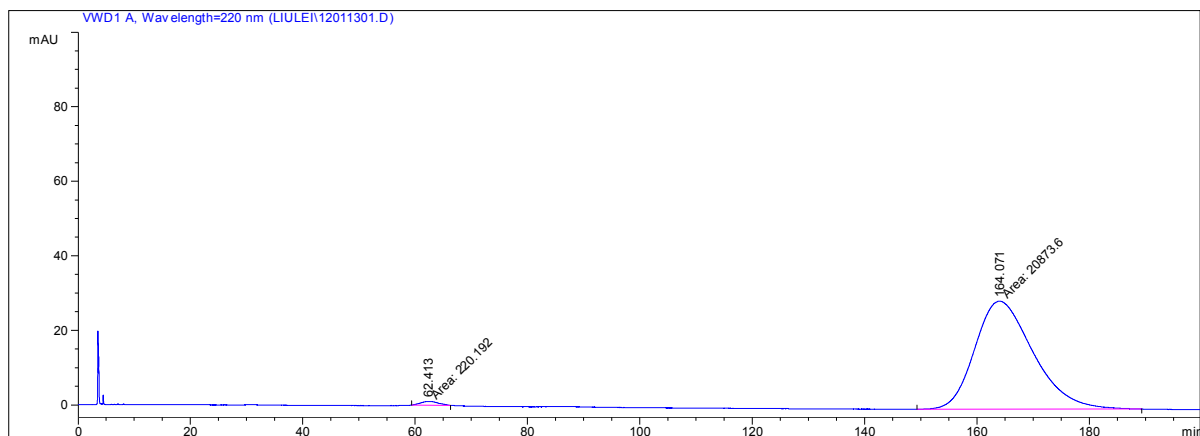

| # | Time    | Area    | Height | Width   | Area%  | Symmetry |
|---|---------|---------|--------|---------|--------|----------|
| 1 | 62.413  | 220.2   | 1      | 3.6054  | 1.044  | 0.823    |
| 2 | 164.071 | 20873.6 | 29     | 12.0014 | 98.956 | 0.723    |

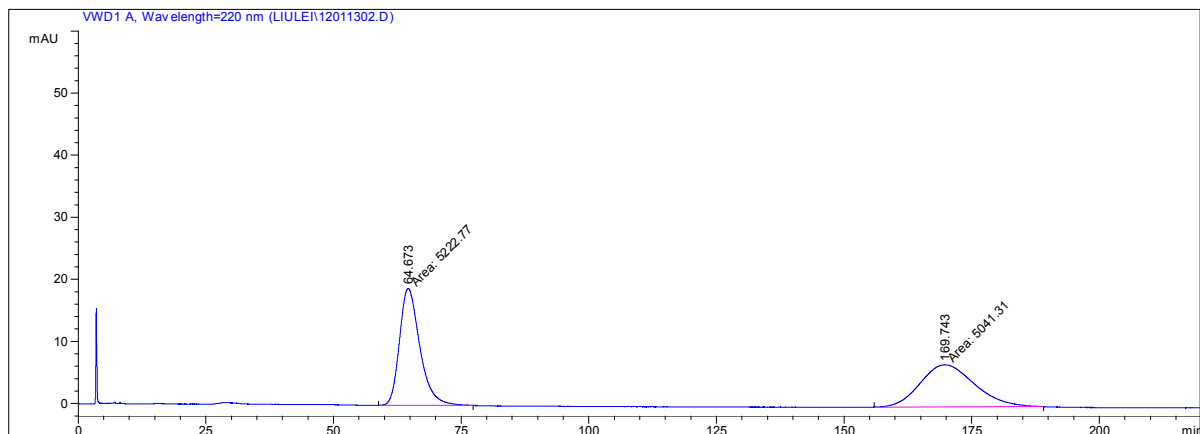

| # | Time    | Area   | Height | Width   | Area%  | Symmetry |
|---|---------|--------|--------|---------|--------|----------|
| 1 | 64.673  | 5222.8 | 18.8   | 4.6226  | 50.884 | 0.739    |
| 2 | 169.743 | 5041.3 | 6.8    | 12.3421 | 49.116 | 0.819    |

Daicel Chiralcel AD-H column, *n*-hexane / *i*-PrOH = 80:20, 1.0 mL/min, 220 nm; 99.5%ee

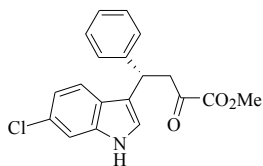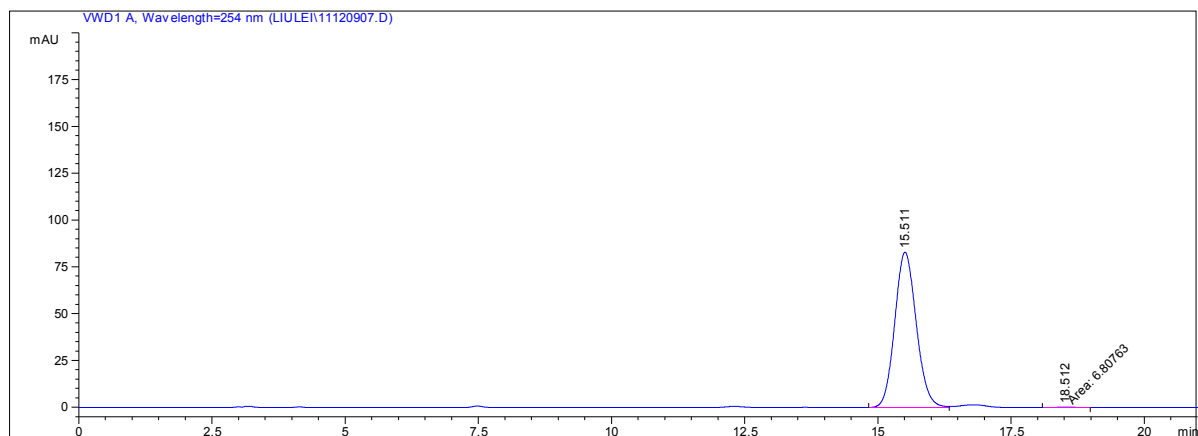

| # | Time   | Area   | Height | Width  | Area%  | Symmetry |
|---|--------|--------|--------|--------|--------|----------|
| 1 | 15.511 | 2335.2 | 83     | 0.4359 | 99.709 | 0.868    |
| 2 | 18.512 | 6.8    | 2.2    | 0.526  | 0.291  | 0.85     |

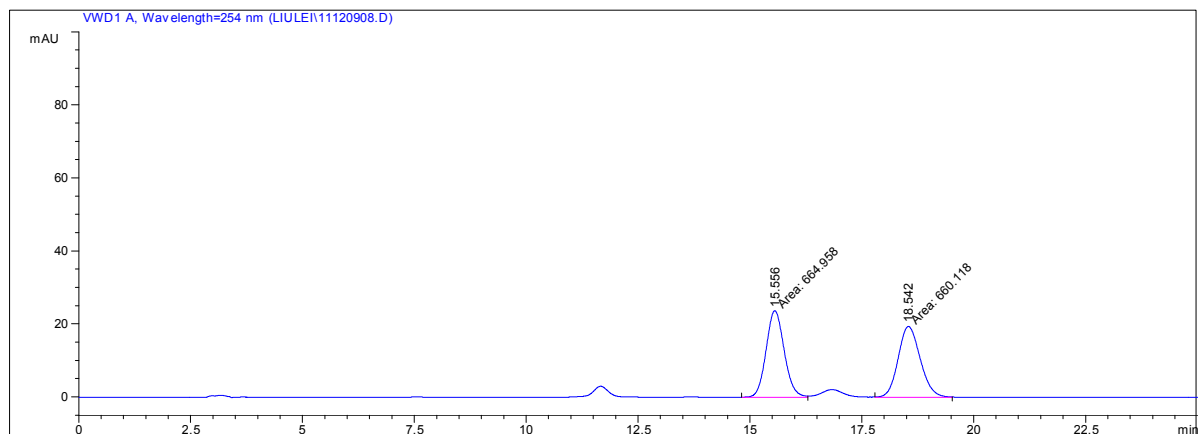

| # | Time   | Area  | Height | Width  | Area%  | Symmetry |
|---|--------|-------|--------|--------|--------|----------|
| 1 | 15.556 | 665   | 23.7   | 0.468  | 50.183 | 0.896    |
| 2 | 18.542 | 660.1 | 19.3   | 0.5688 | 49.817 | 0.844    |



Daicel Chiralcel AD-H column, *n*-hexane/*i*-PrOH = 85:15, 0.5 mL/min, 220 nm; 99.2% ee

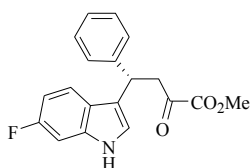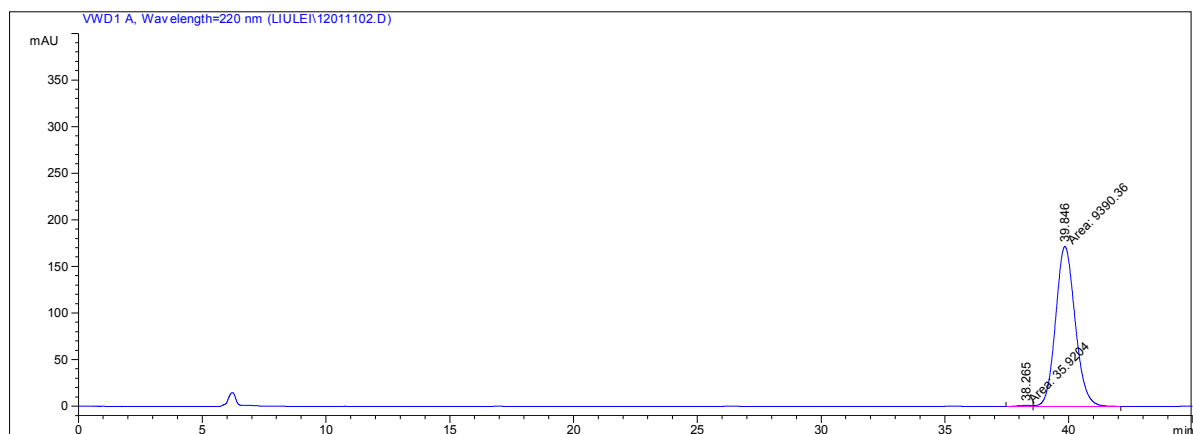

| # | Time   | Area   | Height | Width  | Area%  | Symmetry |
|---|--------|--------|--------|--------|--------|----------|
| 1 | 38.265 | 35.9   | 9.5    | 0.6334 | 0.381  | 1.29     |
| 2 | 39.846 | 9390.4 | 171.6  | 0.9121 | 99.619 | 0.877    |

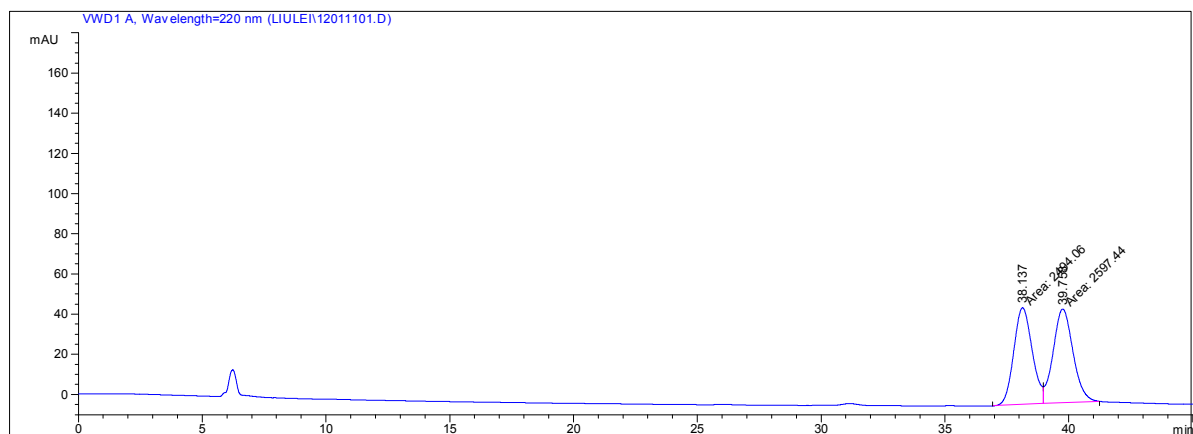

| # | Time   | Area   | Height | Width  | Area%  | Symmetry |
|---|--------|--------|--------|--------|--------|----------|
| 1 | 38.137 | 2494.1 | 48.1   | 0.8648 | 48.985 | 0.886    |
| 2 | 39.758 | 2597.4 | 46.6   | 0.929  | 51.015 | 0.9      |

Daicel Chiralcel AD-H column, *n*-hexane/*i*-PrOH = 80:20, 1.0 mL/min, 220 nm; 96.3% ee

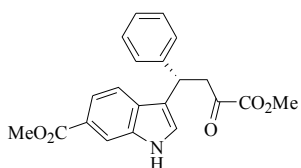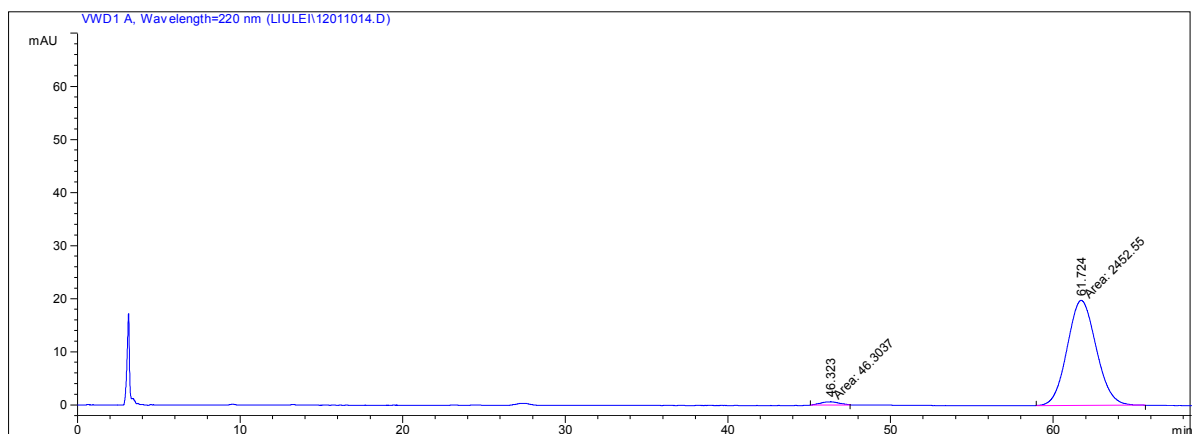

| # | Time   | Area   | Height | Width  | Area%  | Symmetry |
|---|--------|--------|--------|--------|--------|----------|
| 1 | 46.323 | 46.3   | 6.1    | 1.28   | 1.853  | 1.151    |
| 2 | 61.724 | 2452.6 | 19.8   | 2.0653 | 98.147 | 0.911    |

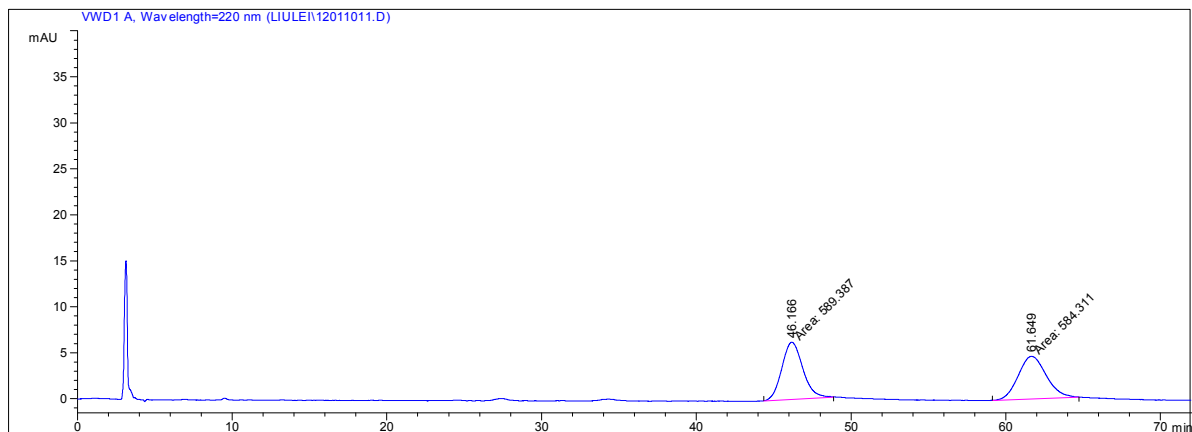

| # | Time   | Area  | Height | Width  | Area%  | Symmetry |
|---|--------|-------|--------|--------|--------|----------|
| 1 | 46.166 | 589.4 | 6.2    | 1.5772 | 50.216 | 0.863    |
| 2 | 61.649 | 584.3 | 4.6    | 2.1045 | 49.784 | 0.859    |

## HPLC chromatogram for pyrrole adducts

Daicel Chiralcel AD-H column, *n*-hexane/*i*-PrOH = 95:5, 0.5 mL/min, 220 nm; 92% ee

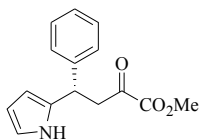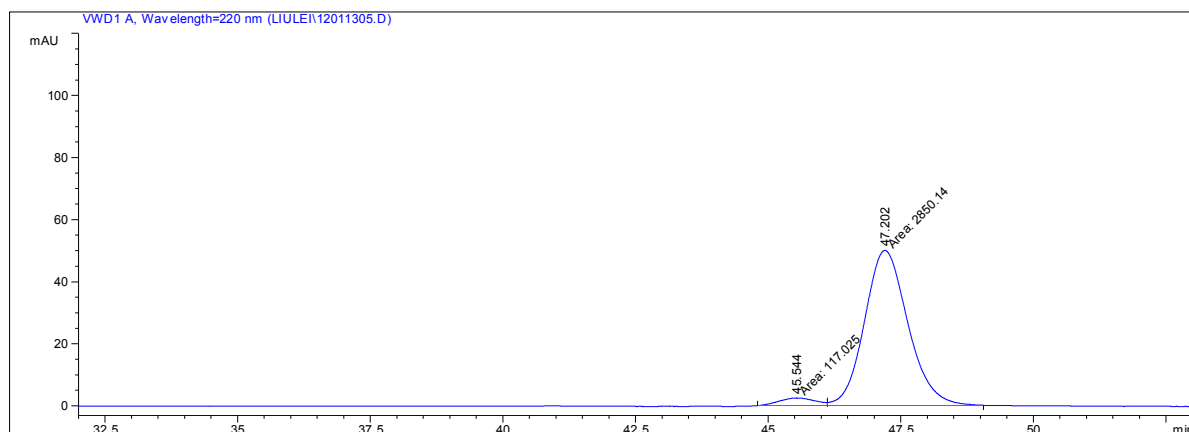

| # | Time   | Area   | Height | Width  | Area%  | Symmetry |
|---|--------|--------|--------|--------|--------|----------|
| 1 | 45.544 | 117    | 2.5    | 0.7934 | 3.944  | 0.943    |
| 2 | 47.202 | 2850.1 | 50     | 0.9495 | 96.056 | 0.856    |

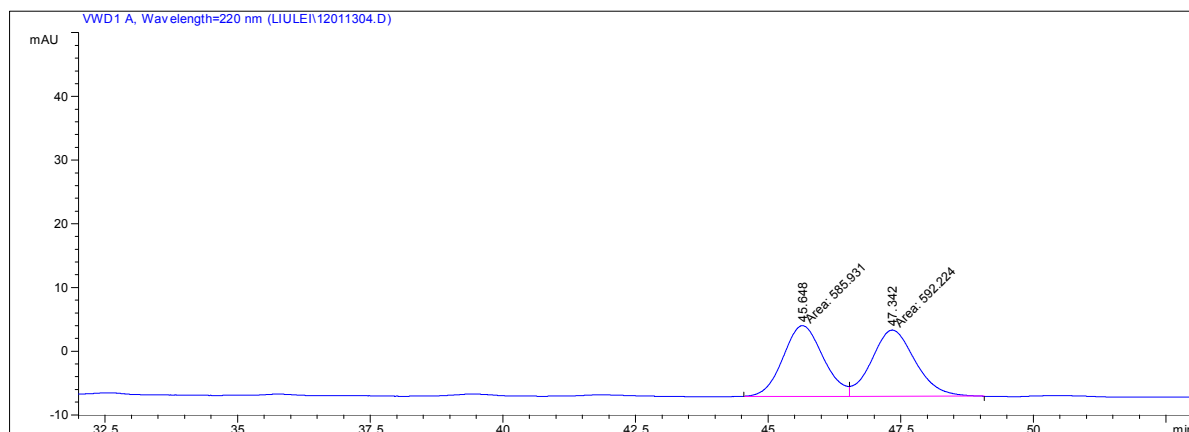

| # | Time   | Area  | Height | Width  | Area%  | Symmetry |
|---|--------|-------|--------|--------|--------|----------|
| 1 | 45.648 | 585.9 | 11.1   | 0.8799 | 49.733 | 0.905    |
| 2 | 47.342 | 592.2 | 10.4   | 0.9498 | 50.267 | 0.878    |

Daicel Chiralcel AD-H column, *n*-hexane/*i*-PrOH = 98:2, 0.5 mL/min, 220 nm; 92% ee

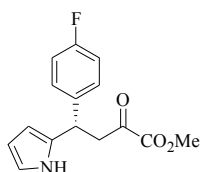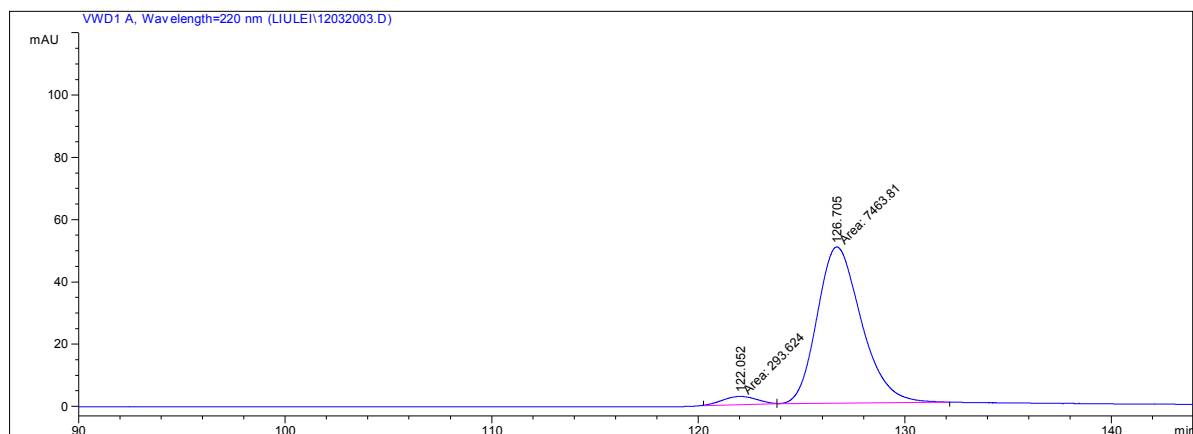

| # | Time    | Area   | Height | Width  | Area%  | Symmetry |
|---|---------|--------|--------|--------|--------|----------|
| 1 | 122.052 | 293.6  | 2.6    | 1.8841 | 3.785  | 1.129    |
| 2 | 126.705 | 7463.8 | 50.2   | 2.4792 | 96.215 | 0.768    |

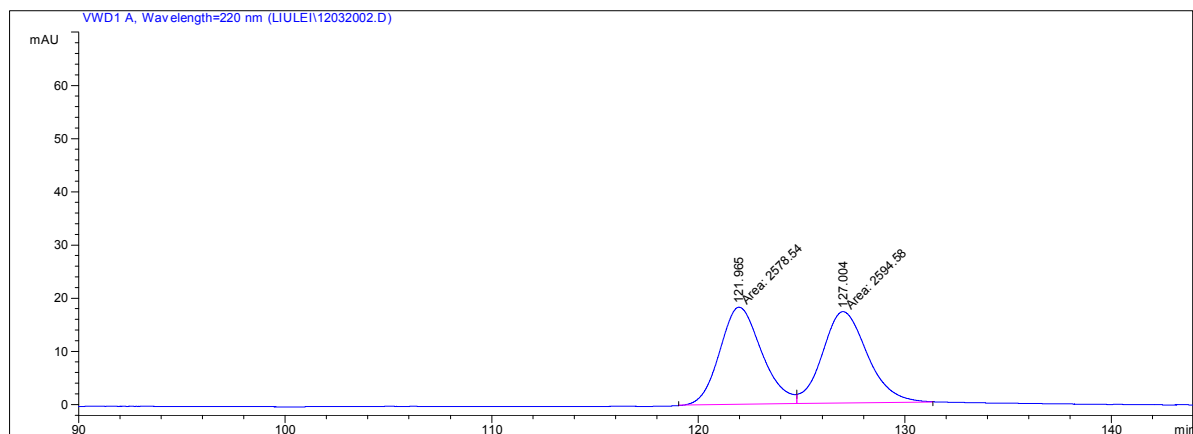

| # | Time    | Area   | Height | Width  | Area%  | Symmetry |
|---|---------|--------|--------|--------|--------|----------|
| 1 | 121.965 | 2578.5 | 18.3   | 2.353  | 49.845 | 0.806    |
| 2 | 127.004 | 2594.6 | 17.2   | 2.5192 | 50.155 | 0.819    |

Daicel Chiralcel AD-H column, *n*-hexane/*i*-PrOH = 95:5, 0.5 mL/min, 220 nm; 90% ee

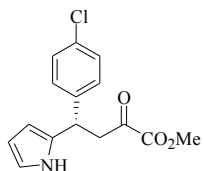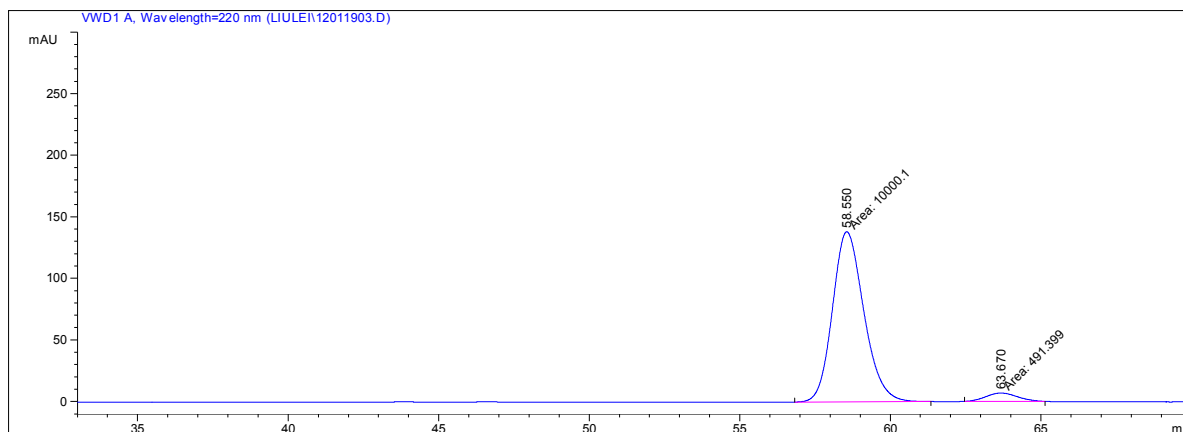

| # | Time  | Area    | Height | Width  | Area%  | Symmetry |
|---|-------|---------|--------|--------|--------|----------|
| 1 | 58.55 | 10000.1 | 138.1  | 1.2065 | 95.316 | 0.809    |
| 2 | 63.67 | 491.4   | 6.8    | 1.2067 | 4.684  | 0.887    |

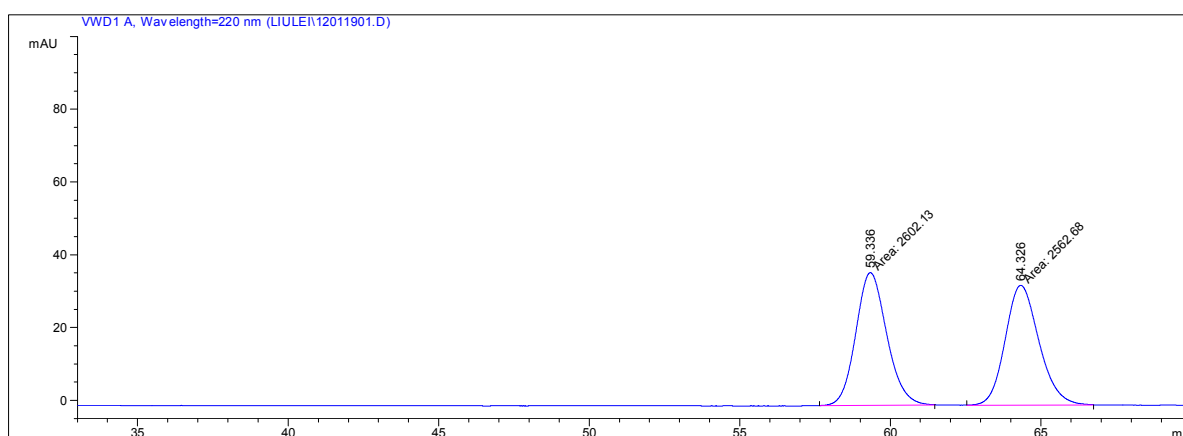

| # | Time   | Area   | Height | Width  | Area%  | Symmetry |
|---|--------|--------|--------|--------|--------|----------|
| 1 | 59.336 | 2602.1 | 36.4   | 1.19   | 50.382 | 0.87     |
| 2 | 64.326 | 2562.7 | 32.9   | 1.2987 | 49.618 | 0.821    |

Daicel Chiralcel AD-H column, *n*-hexane/*i*-PrOH = 95:5, 0.5 mL/min, 220 nm; 90% ee

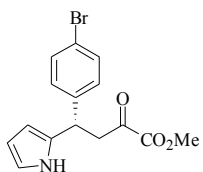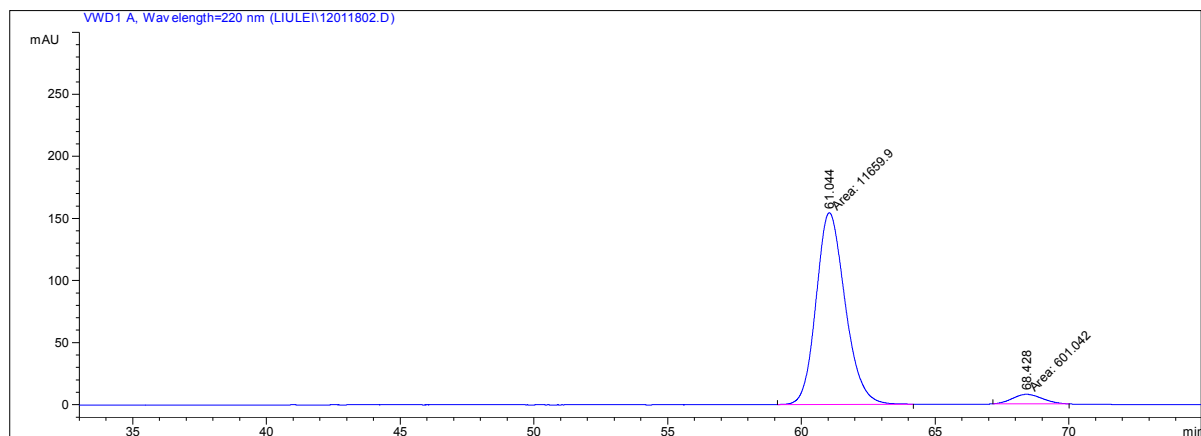

| # | Time   | Area    | Height | Width  | Area%  | Symmetry |
|---|--------|---------|--------|--------|--------|----------|
| 1 | 61.044 | 11659.9 | 154.4  | 1.2587 | 95.098 | 0.804    |
| 2 | 68.428 | 601     | 7.7    | 1.2972 | 4.902  | 0.891    |

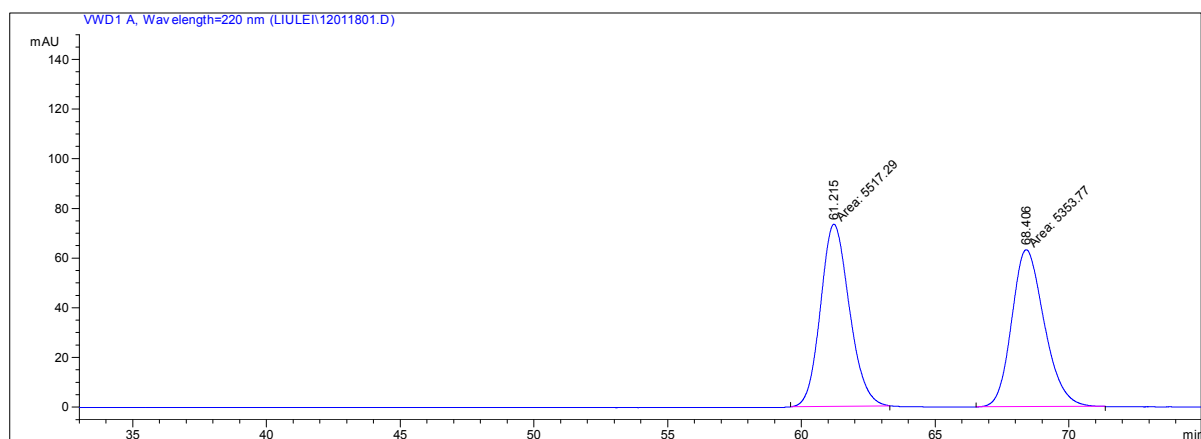

| # | Time   | Area   | Height | Width  | Area%  | Symmetry |
|---|--------|--------|--------|--------|--------|----------|
| 1 | 61.215 | 5517.3 | 73.4   | 1.253  | 50.752 | 0.836    |
| 2 | 68.406 | 5353.8 | 63.3   | 1.4106 | 49.248 | 0.778    |

Daicel Chiralcel AD-H column, *n*-hexane/*i*-PrOH = 90:10, 1.0 mL/min, 220 nm; 91% ee

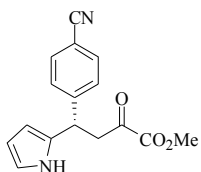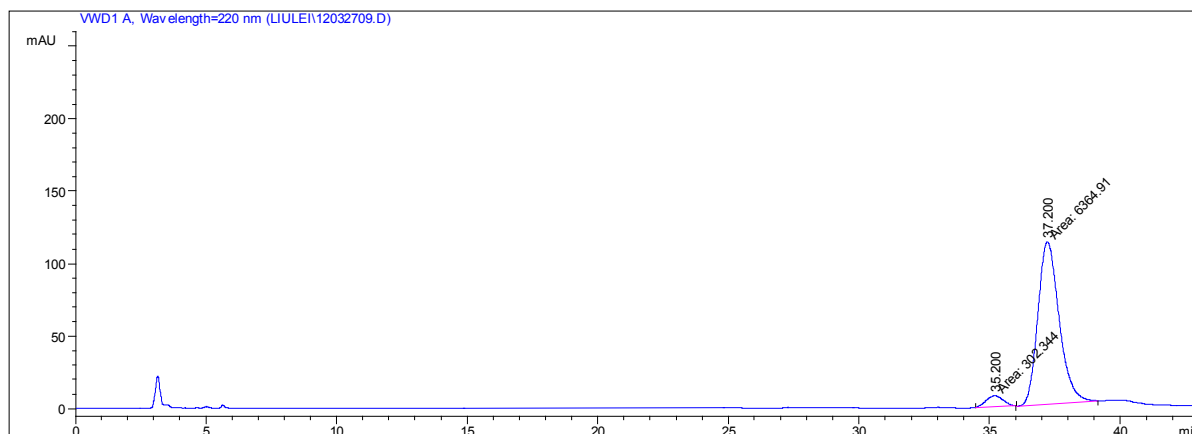

| # | Time | Area   | Height | Width  | Area%  | Symmetry |
|---|------|--------|--------|--------|--------|----------|
| 1 | 35.2 | 302.3  | 7      | 0.7198 | 4.535  | 0.899    |
| 2 | 37.2 | 6364.9 | 112    | 0.9475 | 95.465 | 0.784    |

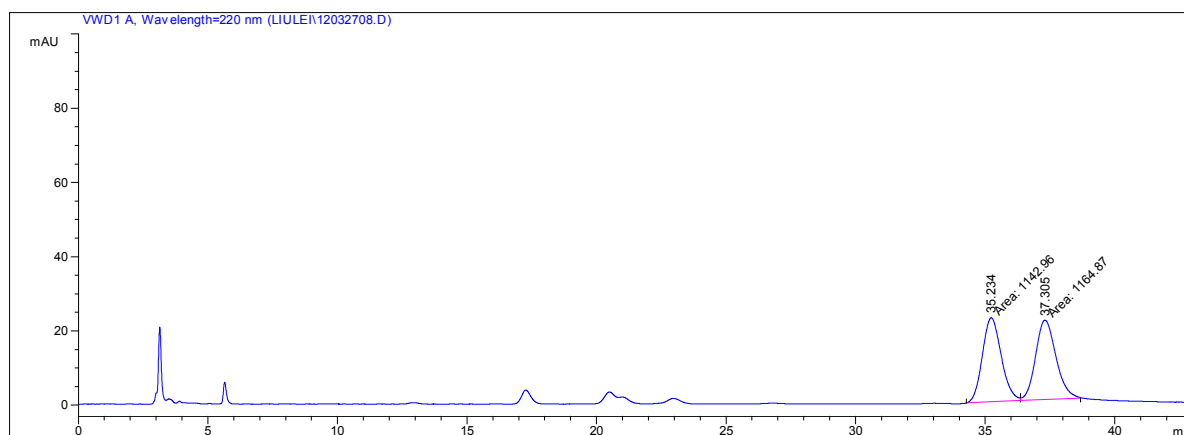

| # | Time   | Area   | Height | Width  | Area%  | Symmetry |
|---|--------|--------|--------|--------|--------|----------|
| 1 | 35.234 | 1143   | 22.6   | 0.8416 | 49.525 | 0.866    |
| 2 | 37.305 | 1164.9 | 21.3   | 0.9096 | 50.475 | 0.825    |

Daicel Chiralcel AS-H column, *n*-hexane / *i*-PrOH = 75:25, 1.0 mL/min, 220 nm; 86% ee

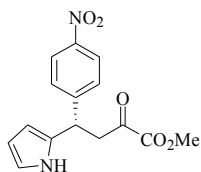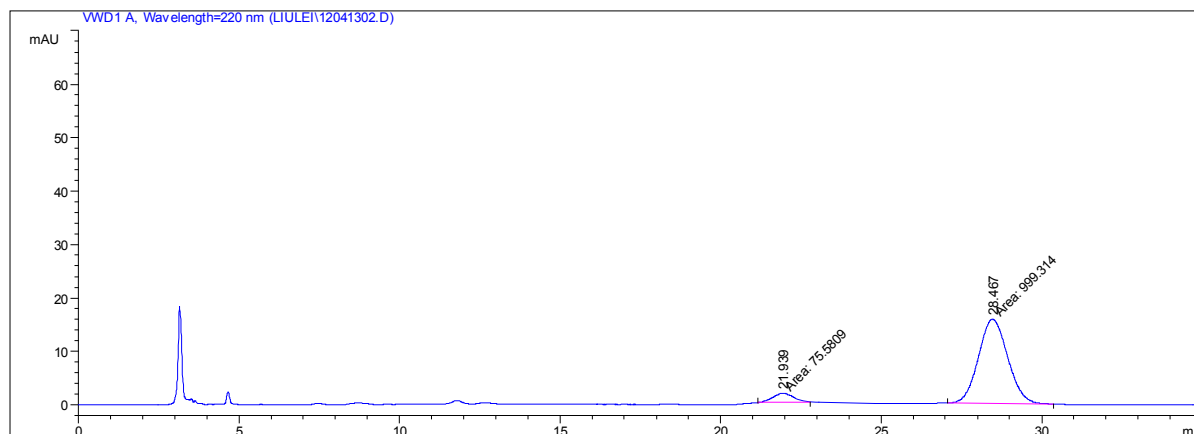

| # | Time   | Area  | Height | Width  | Area%  | Symmetry |
|---|--------|-------|--------|--------|--------|----------|
| 1 | 21.939 | 75.6  | 1.7    | 0.7579 | 7.031  | 0.899    |
| 2 | 28.467 | 999.3 | 15.8   | 1.0563 | 92.969 | 0.884    |

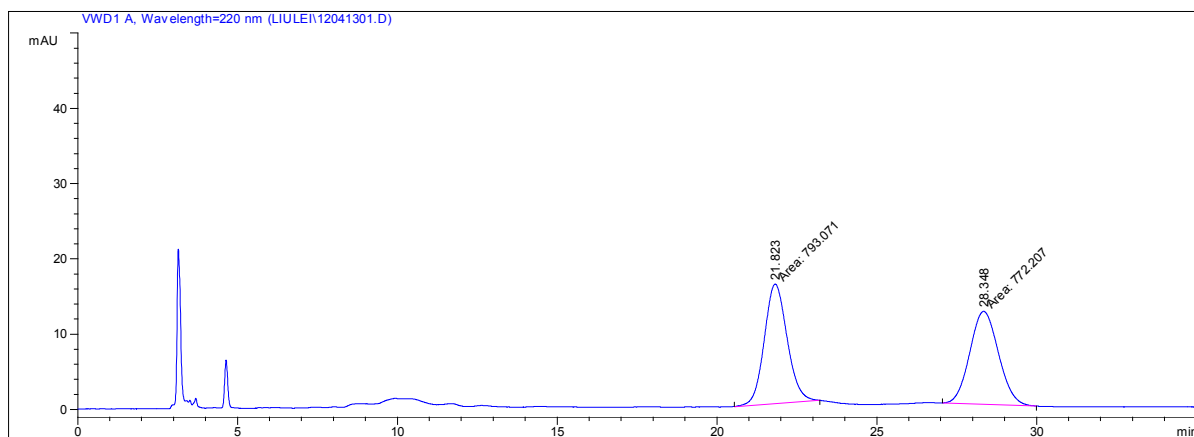

| # | Time   | Area  | Height | Width  | Area%  | Symmetry |
|---|--------|-------|--------|--------|--------|----------|
| 1 | 21.823 | 793.1 | 15.9   | 0.8313 | 50.666 | 0.891    |
| 2 | 28.348 | 772.2 | 12.4   | 1.0409 | 49.334 | 0.905    |



Daicel Chiralcel AD-H column, *n*-hexane/*i*-PrOH = 95:5, 0.5 mL/min, 220 nm; 88% ee

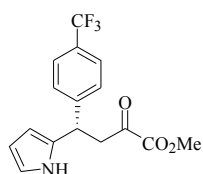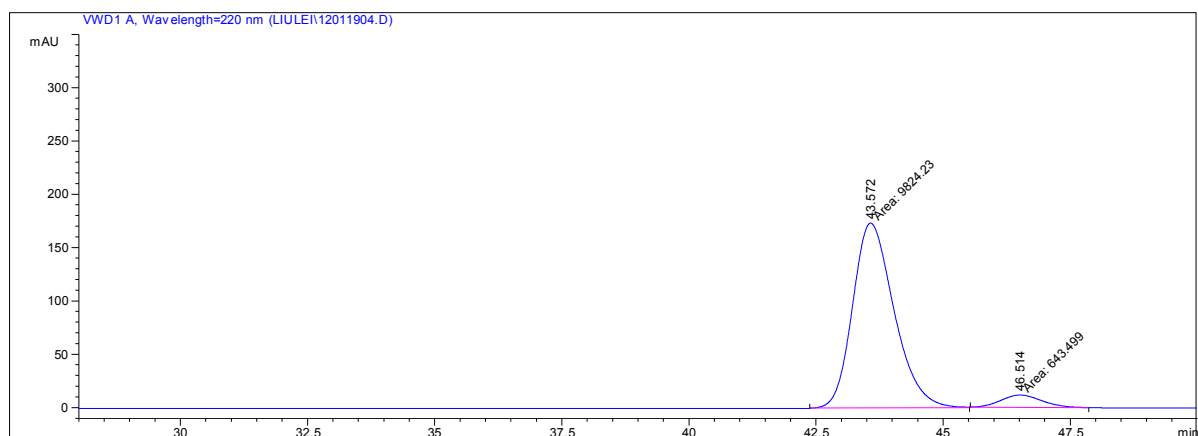

| # | Time   | Area   | Height | Width  | Area%  | Symmetry |
|---|--------|--------|--------|--------|--------|----------|
| 1 | 43.572 | 9824.2 | 173.3  | 0.9447 | 93.853 | 0.743    |
| 2 | 46.514 | 643.5  | 11.5   | 0.9317 | 6.147  | 0.873    |

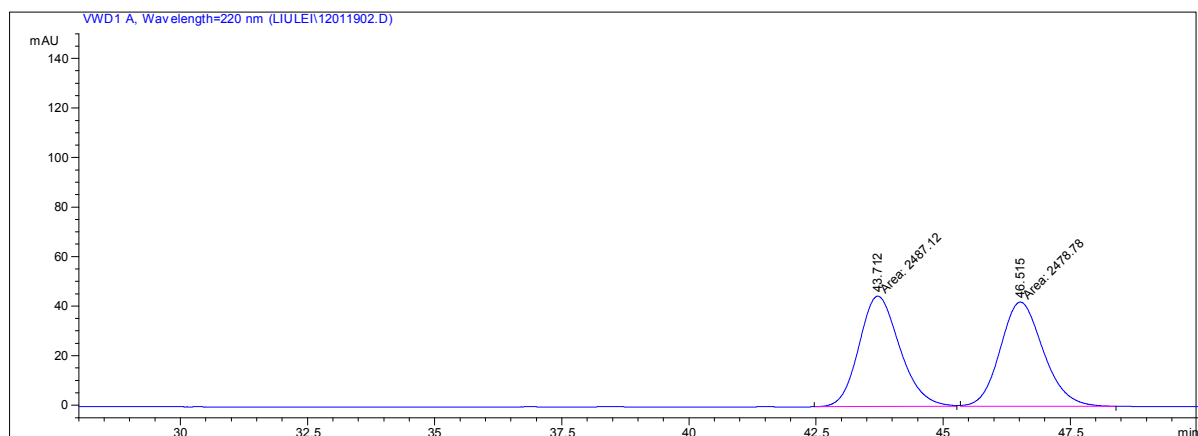

| # | Time   | Area   | Height | Width  | Area%  | Symmetry |
|---|--------|--------|--------|--------|--------|----------|
| 1 | 43.712 | 2487.1 | 44.5   | 0.9305 | 50.084 | 0.821    |
| 2 | 46.515 | 2478.8 | 42.1   | 0.9818 | 49.916 | 0.845    |

Daicel Chiralcel AD-H column, *n*-hexane/*i*-PrOH =80:20, 0.5 mL/min, 220 nm; 85% ee

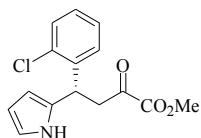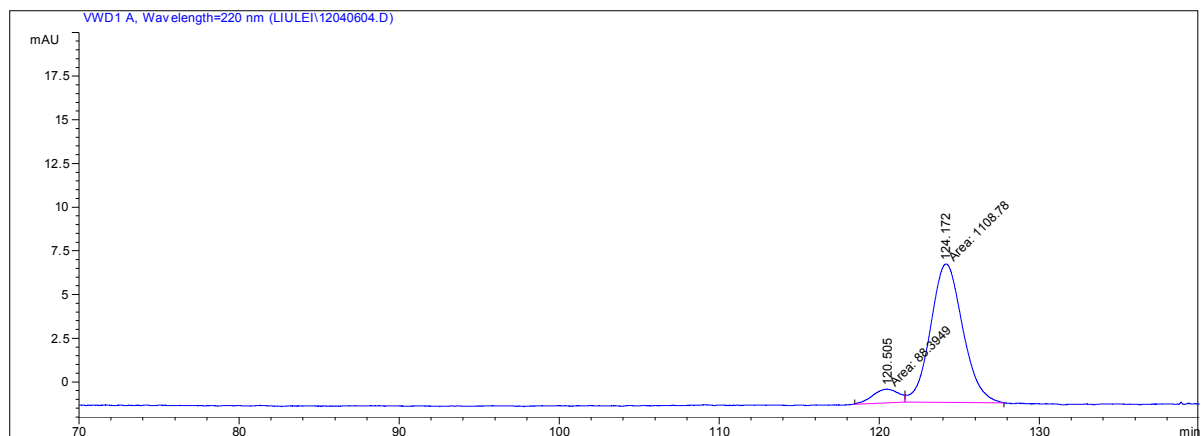

| # | Time    | Area   | Height | Width  | Area%  | Symmetry |
|---|---------|--------|--------|--------|--------|----------|
| 1 | 120.505 | 88.4   | 7.8E-1 | 1.8806 | 7.384  | 1.253    |
| 2 | 124.172 | 1108.8 | 7.9    | 2.333  | 92.616 | 0.887    |

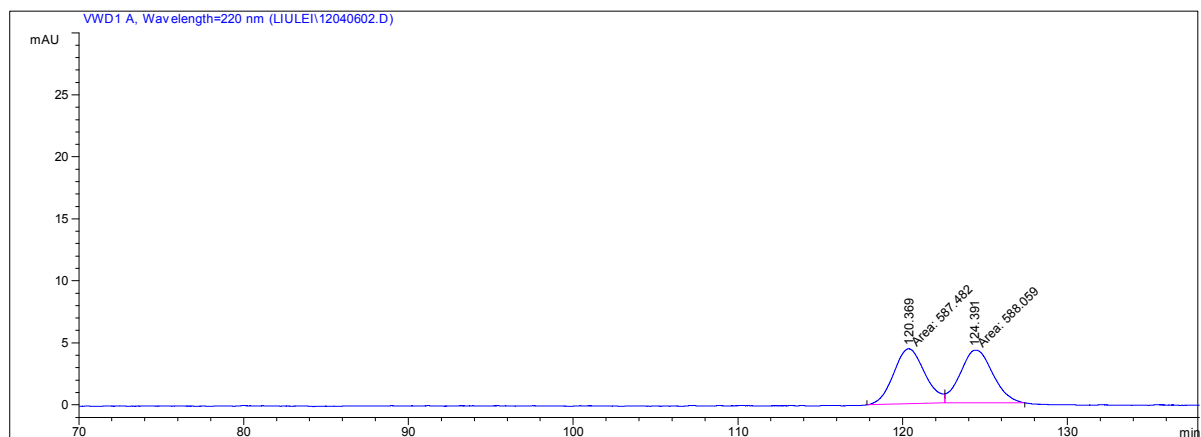

| # | Time    | Area  | Height | Width  | Area%  | Symmetry |
|---|---------|-------|--------|--------|--------|----------|
| 1 | 120.369 | 587.5 | 4.4    | 2.2062 | 49.975 | 0.905    |
| 2 | 124.391 | 588.1 | 4.3    | 2.2961 | 50.025 | 0.824    |

Daicel Chiralcel AD-H column, *n*-hexane / *i*-PrOH = 95:5, 0.5 mL/min, 220 nm; 90% ee

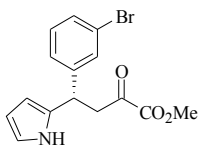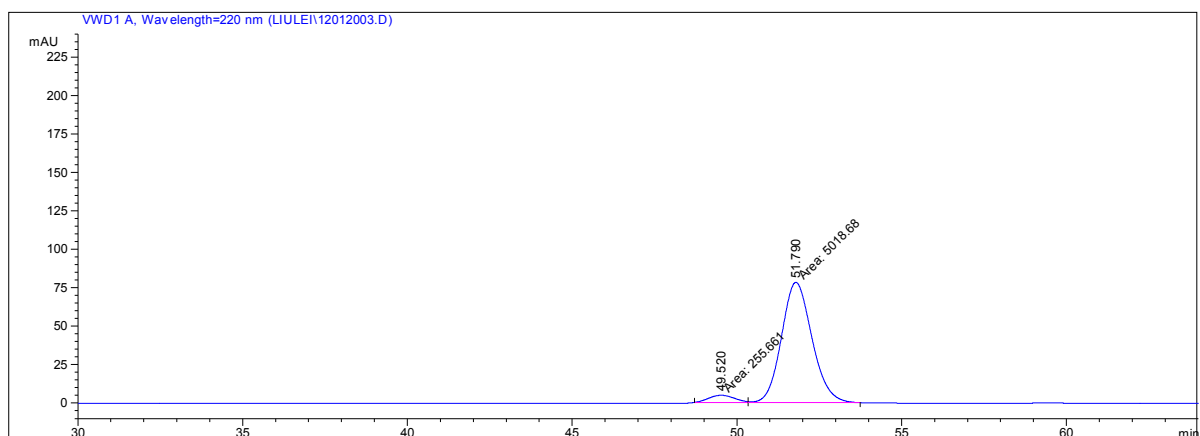

| # | Time  | Area   | Height | Width  | Area%  | Symmetry |
|---|-------|--------|--------|--------|--------|----------|
| 1 | 49.52 | 255.7  | 4.7    | 0.9008 | 4.847  | 0.944    |
| 2 | 51.79 | 5018.7 | 78.1   | 1.071  | 95.153 | 0.865    |

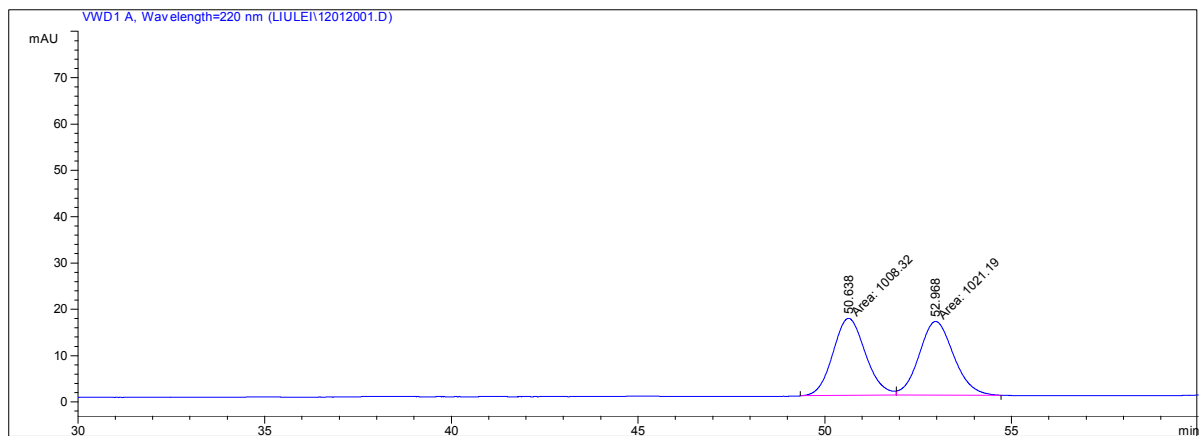

| # | Time   | Area   | Height | Width  | Area%  | Symmetry |
|---|--------|--------|--------|--------|--------|----------|
| 1 | 50.638 | 1008.3 | 16.6   | 1.0099 | 49.683 | 0.896    |
| 2 | 52.968 | 1021.2 | 15.9   | 1.07   | 50.317 | 0.88     |

Daicel Chiralcel AS-H column, *n*-hexane / *i*-PrOH = 90:10, 1.0 mL/min, 220 nm; 88% ee

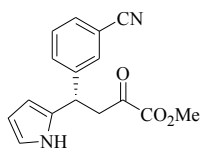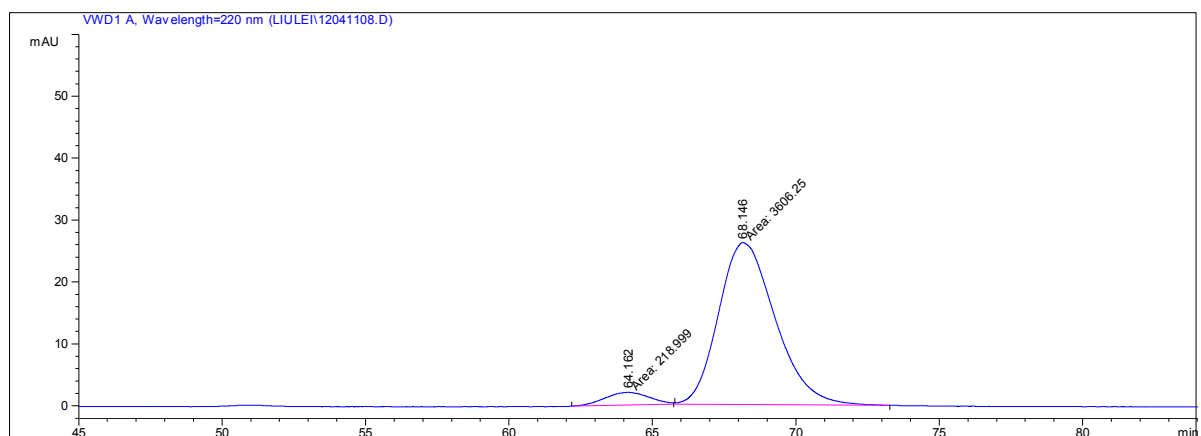

| # | Time   | Area   | Height | Width  | Area%  | Symmetry |
|---|--------|--------|--------|--------|--------|----------|
| 1 | 64.162 | 219    | 2      | 1.7875 | 5.725  | 1.117    |
| 2 | 68.146 | 3606.3 | 26.1   | 2.2986 | 94.275 | 0.721    |

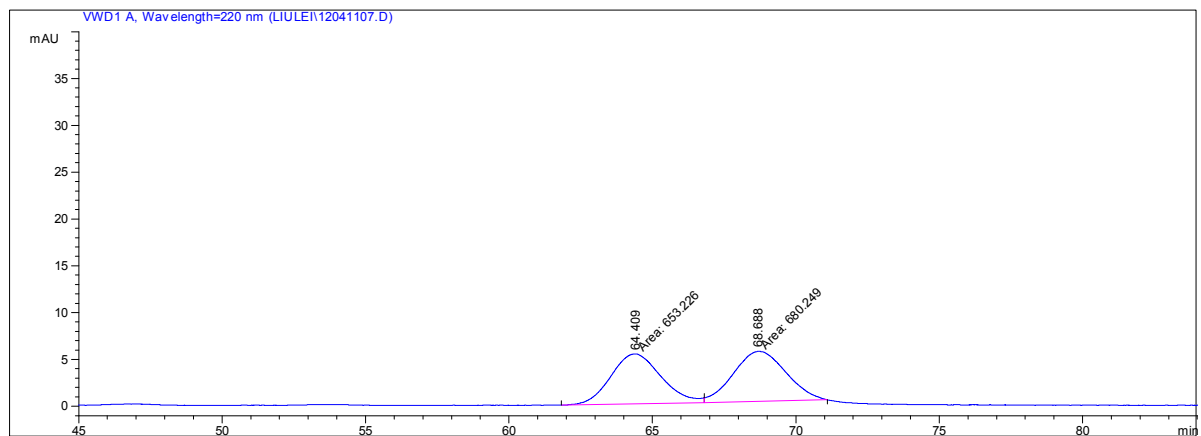

| # | Time   | Area  | Height | Width  | Area%  | Symmetry |
|---|--------|-------|--------|--------|--------|----------|
| 1 | 64.409 | 653.2 | 5.3    | 2.0373 | 48.987 | 0.924    |
| 2 | 68.688 | 680.2 | 5.3    | 2.1229 | 51.013 | 0.897    |

Daicel Chiralcel AD-H column, *n*-hexane / i-PrOH = 95:5, 0.5 mL/min, 220 nm; 89% ee

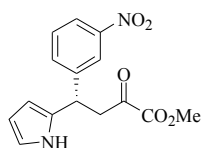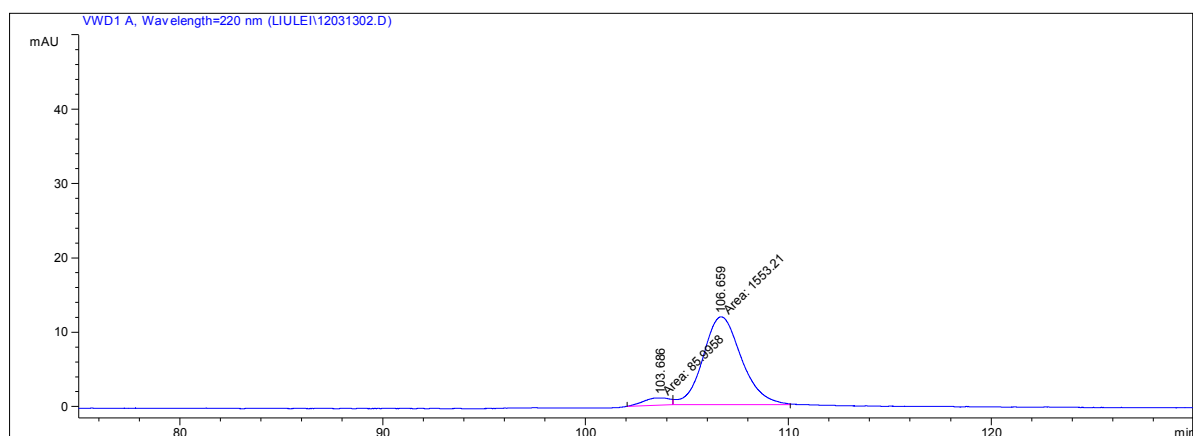

| # | Time    | Area   | Height | Width  | Area%  | Symmetry |
|---|---------|--------|--------|--------|--------|----------|
| 1 | 103.686 | 86     | 9.6E-1 | 1.4987 | 5.246  | 1.753    |
| 2 | 106.659 | 1553.2 | 11.8   | 2.1951 | 94.754 | 0.831    |

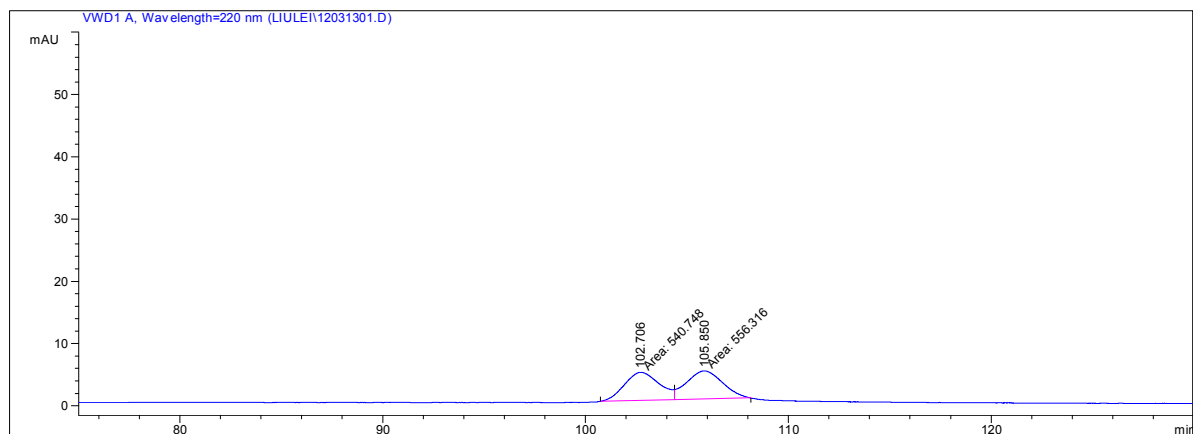

| # | Time    | Area  | Height | Width  | Area%  | Symmetry |
|---|---------|-------|--------|--------|--------|----------|
| 1 | 102.706 | 540.7 | 4.5    | 2.0027 | 49.290 | 0.819    |
| 2 | 105.85  | 556.3 | 4.5    | 2.0532 | 50.710 | 0.96     |

Daicel Chiralcel AD-H column, *n*-hexane/*i*-PrOH = 97:3, 0.5 mL/min, 220 nm; 91% ee

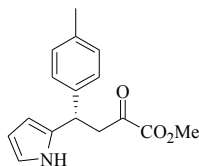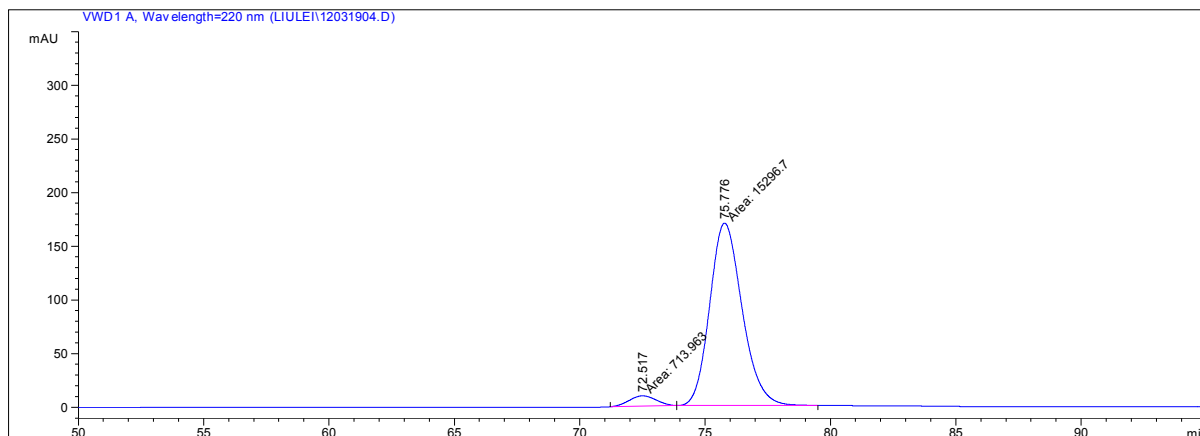

| # | Time   | Area    | Height | Width  | Area%  | Symmetry |
|---|--------|---------|--------|--------|--------|----------|
| 1 | 72.517 | 714     | 9.6    | 1.2449 | 4.459  | 1.001    |
| 2 | 75.776 | 15296.7 | 170    | 1.4996 | 95.541 | 0.816    |

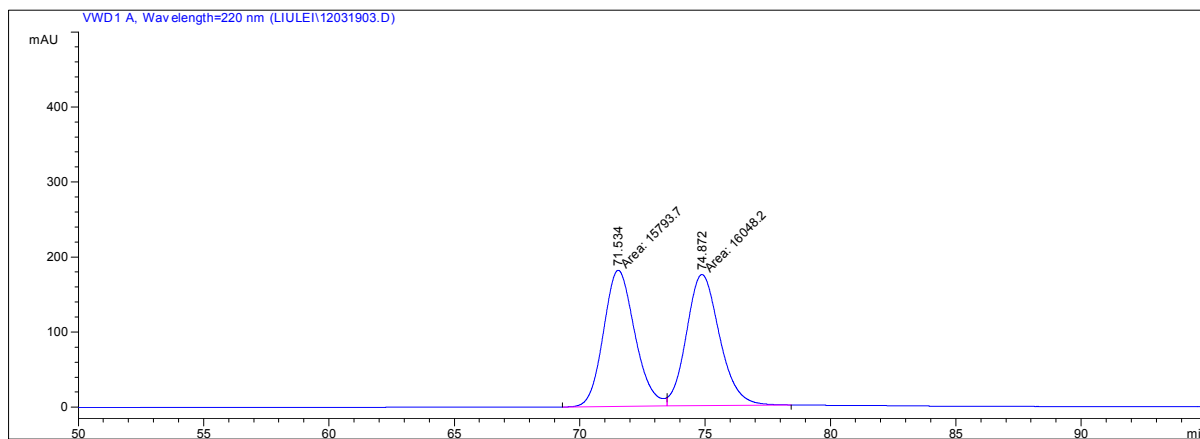

| # | Time   | Area    | Height | Width  | Area%  | Symmetry |
|---|--------|---------|--------|--------|--------|----------|
| 1 | 71.534 | 15793.7 | 181.5  | 1.4505 | 49.600 | 0.849    |
| 2 | 74.872 | 16048.2 | 174.7  | 1.5314 | 50.400 | 0.84     |

Daicel Chiralcel AD-H column, *n*-hexane/*i*-PrOH = 95:5, 0.5 mL/min, 220 nm; 88% ee

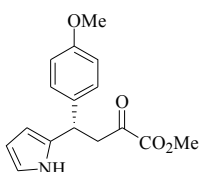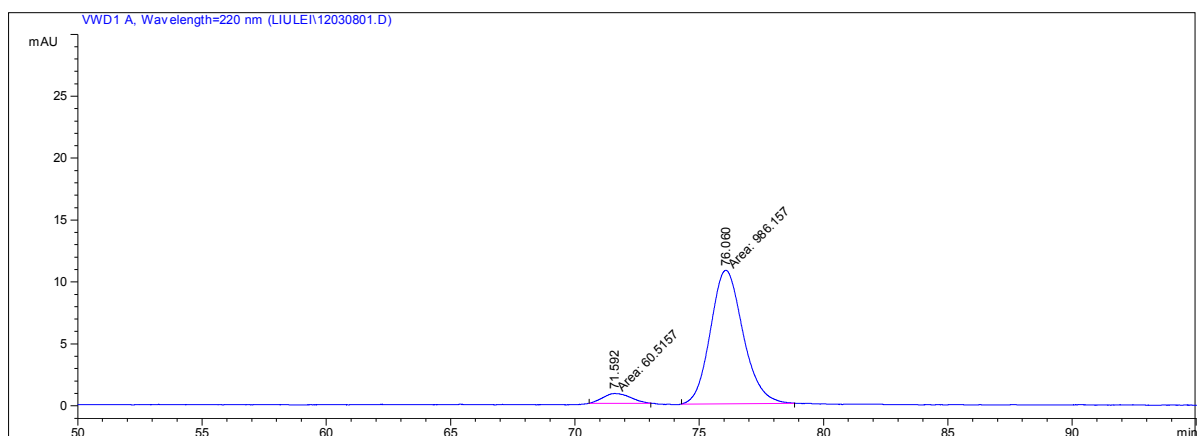

| # | Time   | Area  | Height | Width  | Area%  | Symmetry |
|---|--------|-------|--------|--------|--------|----------|
| 1 | 71.592 | 60.5  | 7.8E-1 | 1.2905 | 5.782  | 0.709    |
| 2 | 76.06  | 986.2 | 10.8   | 1.5241 | 94.218 | 0.837    |

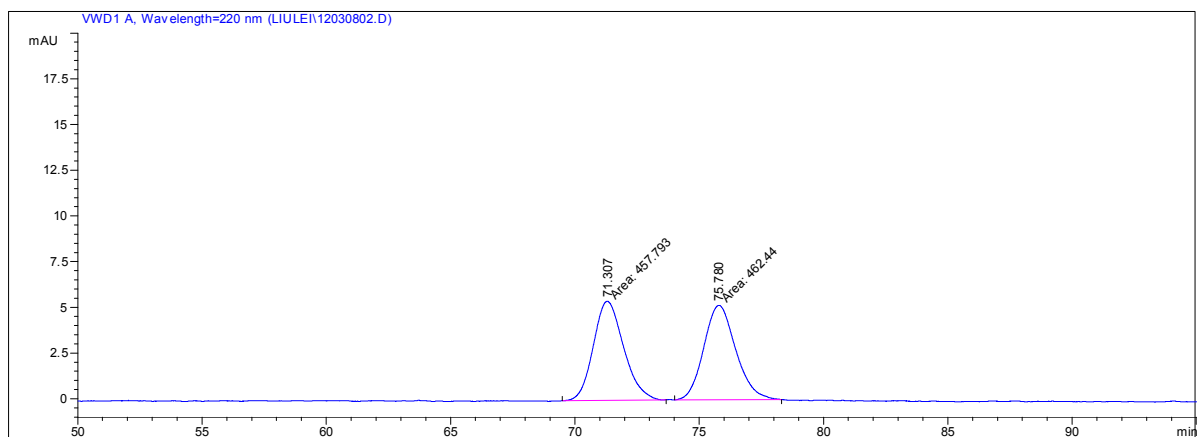

| # | Time   | Area  | Height | Width  | Area%  | Symmetry |
|---|--------|-------|--------|--------|--------|----------|
| 1 | 71.307 | 457.8 | 5.4    | 1.4086 | 49.747 | 0.841    |
| 2 | 75.78  | 462.4 | 5.2    | 1.4924 | 50.253 | 0.839    |

Daicel Chiralcel AS-H column, *n*-hexane/*i*-PrOH = 90:10, 1.0 mL/min, 220 nm; 90% ee

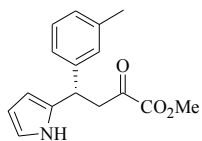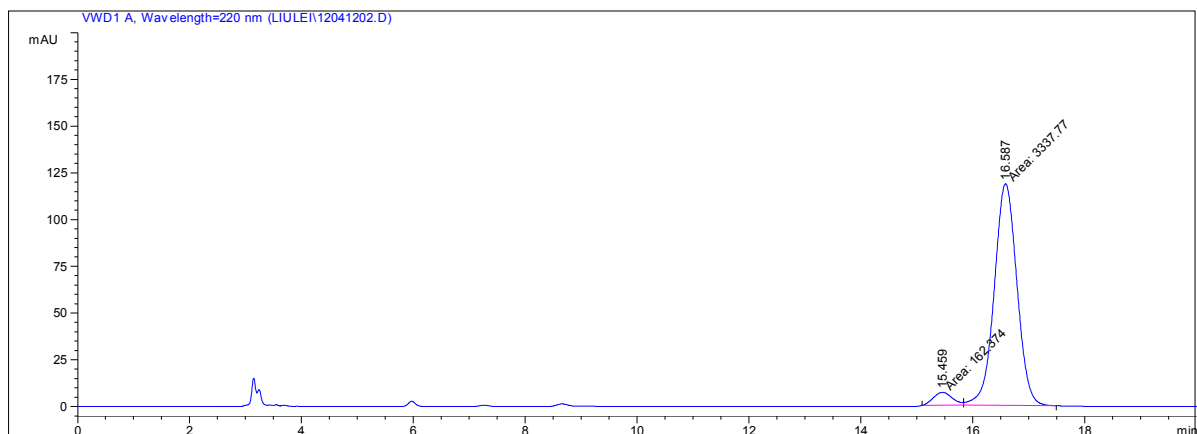

| # | Time   | Area   | Height | Width  | Area%  | Symmetry |
|---|--------|--------|--------|--------|--------|----------|
| 1 | 15.459 | 162.4  | 6.9    | 0.3936 | 4.639  | 0.913    |
| 2 | 16.587 | 3337.8 | 118.5  | 0.4695 | 95.361 | 0.967    |

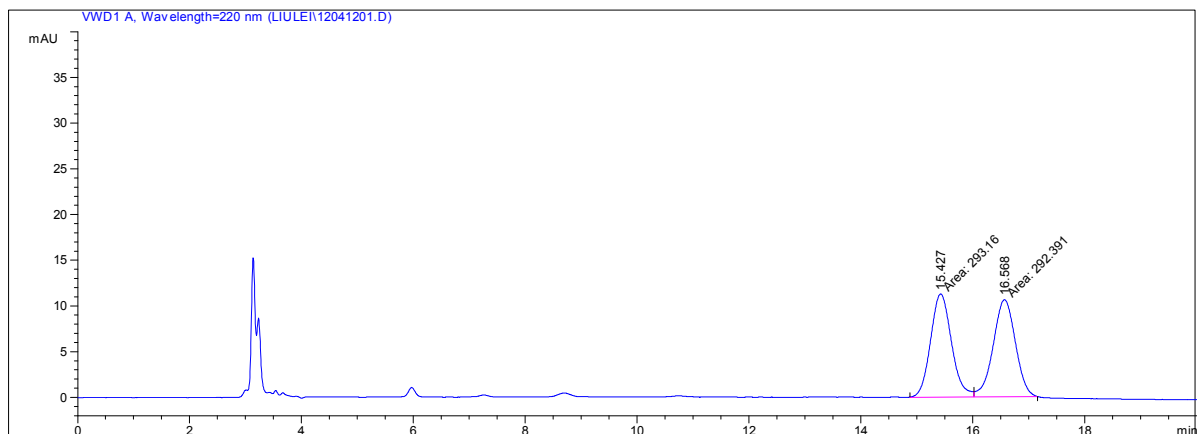

| # | Time   | Area  | Height | Width  | Area%  | Symmetry |
|---|--------|-------|--------|--------|--------|----------|
| 1 | 15.427 | 293.2 | 11.3   | 0.4331 | 50.066 | 0.894    |
| 2 | 16.568 | 292.4 | 10.6   | 0.4596 | 49.934 | 1.007    |



Daicel Chiralcel AD-H column, *n*-hexane/*i*-PrOH = 95:5, 0.5 mL/min, 220 nm; 92% ee

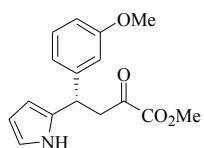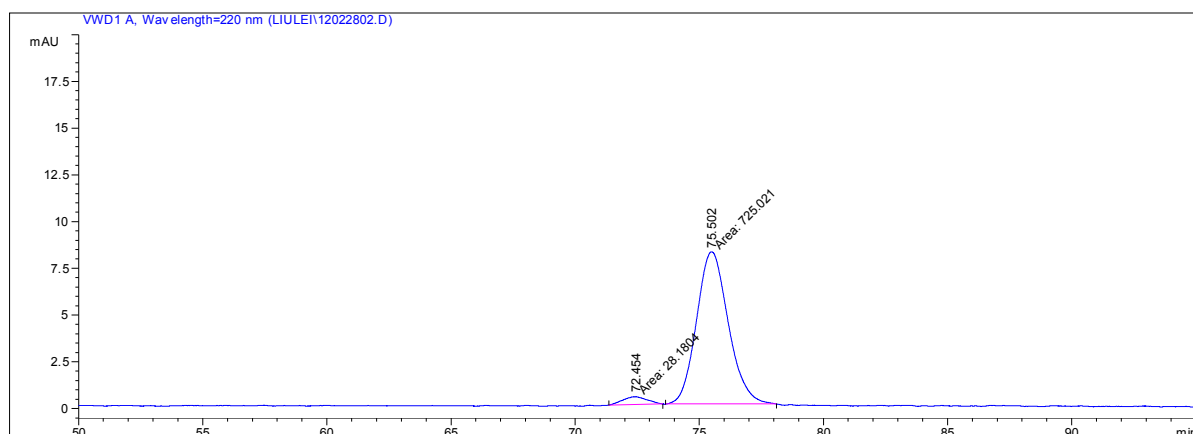

| # | Time   | Area | Height | Width  | Area%  | Symmetry |
|---|--------|------|--------|--------|--------|----------|
| 1 | 72.454 | 28.2 | 4.1E-1 | 1.14   | 3.741  | 1.146    |
| 2 | 75.502 | 725  | 8.1    | 1.4829 | 96.259 | 0.888    |

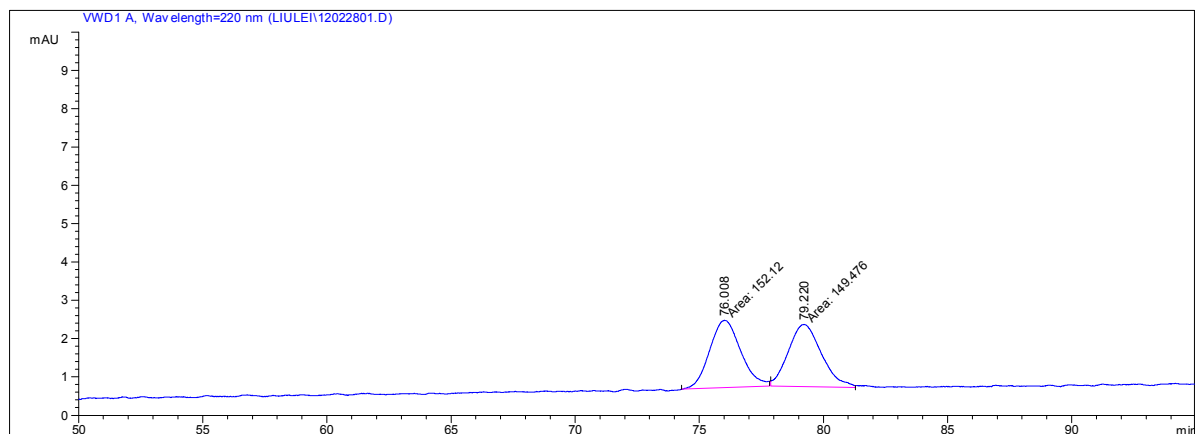

| # | Time   | Area  | Height | Width  | Area%  | Symmetry |
|---|--------|-------|--------|--------|--------|----------|
| 1 | 76.008 | 152.1 | 1.8    | 1.4477 | 50.438 | 0.871    |
| 2 | 79.22  | 149.5 | 1.6    | 1.5404 | 49.562 | 0.871    |

<sup>1</sup>H NMR and <sup>13</sup>C NMR Spectra for indole and pyrrole adducts

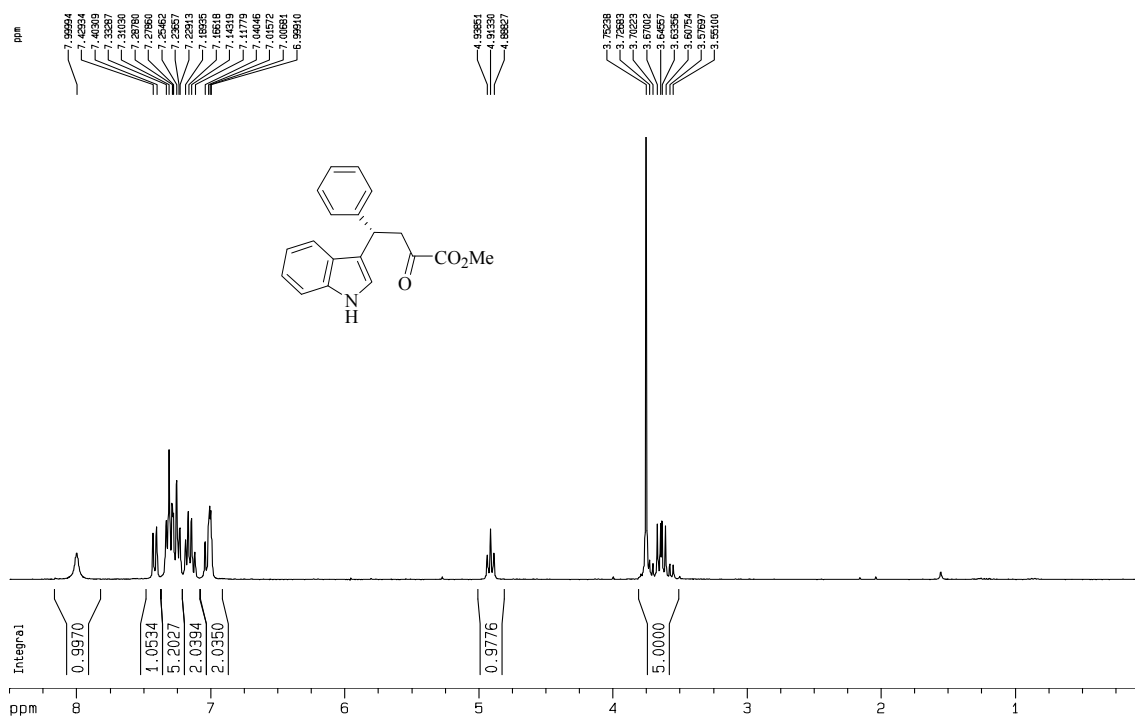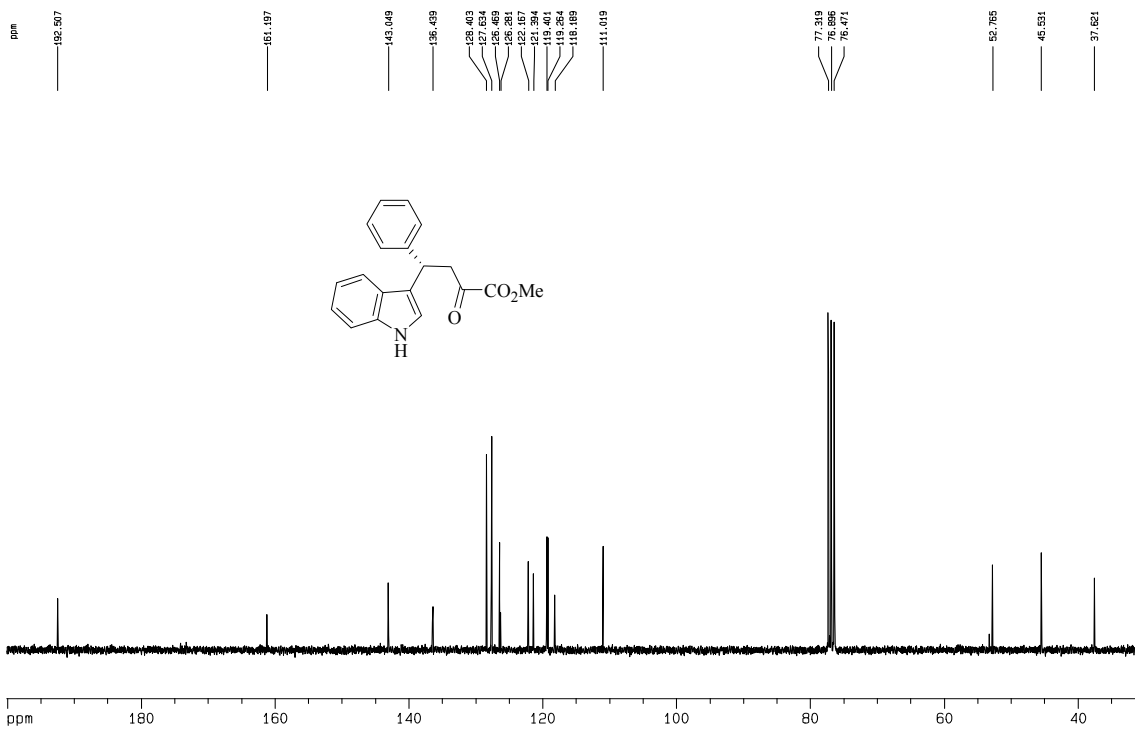

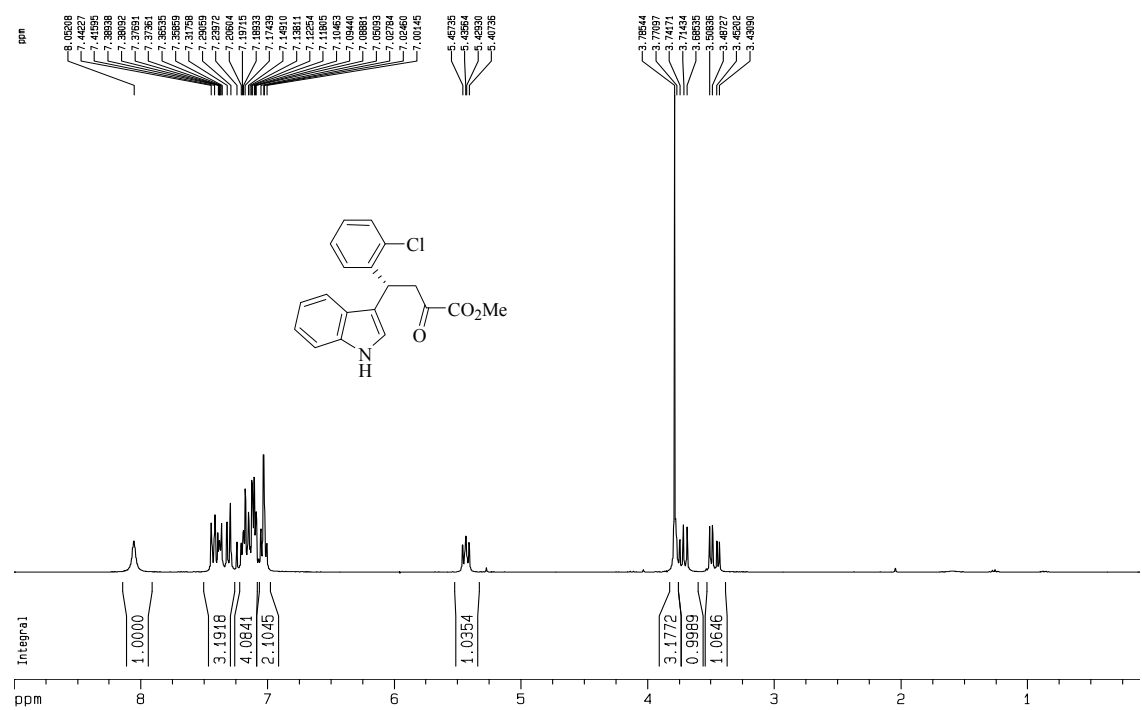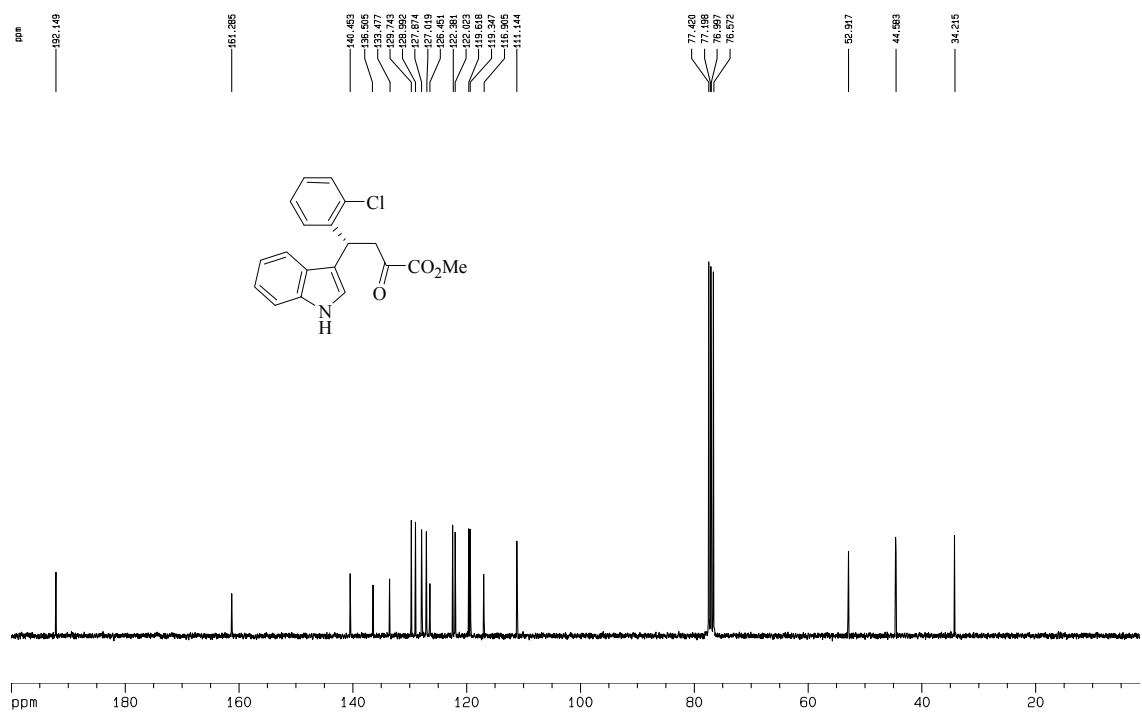

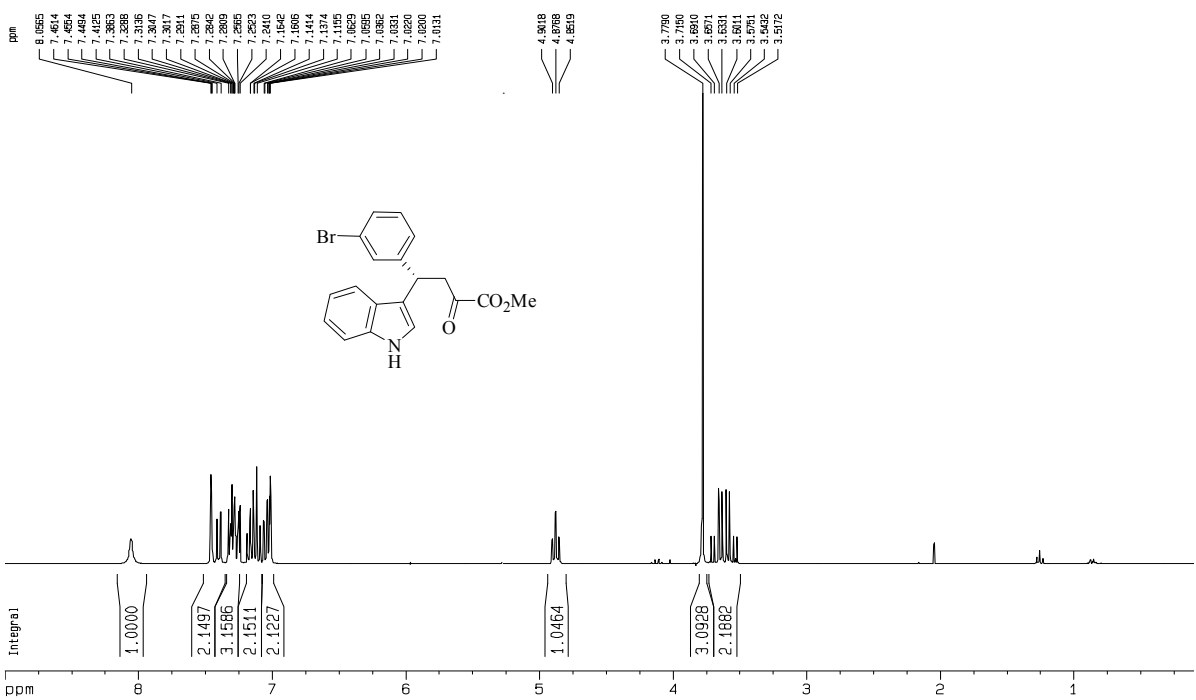

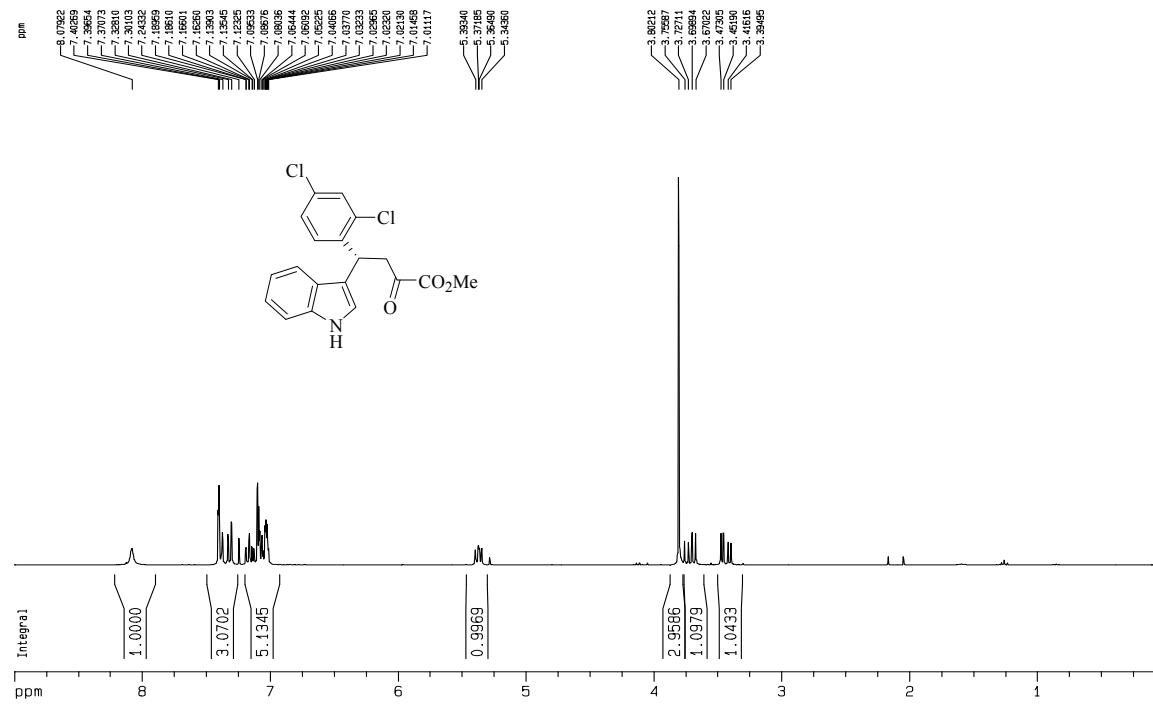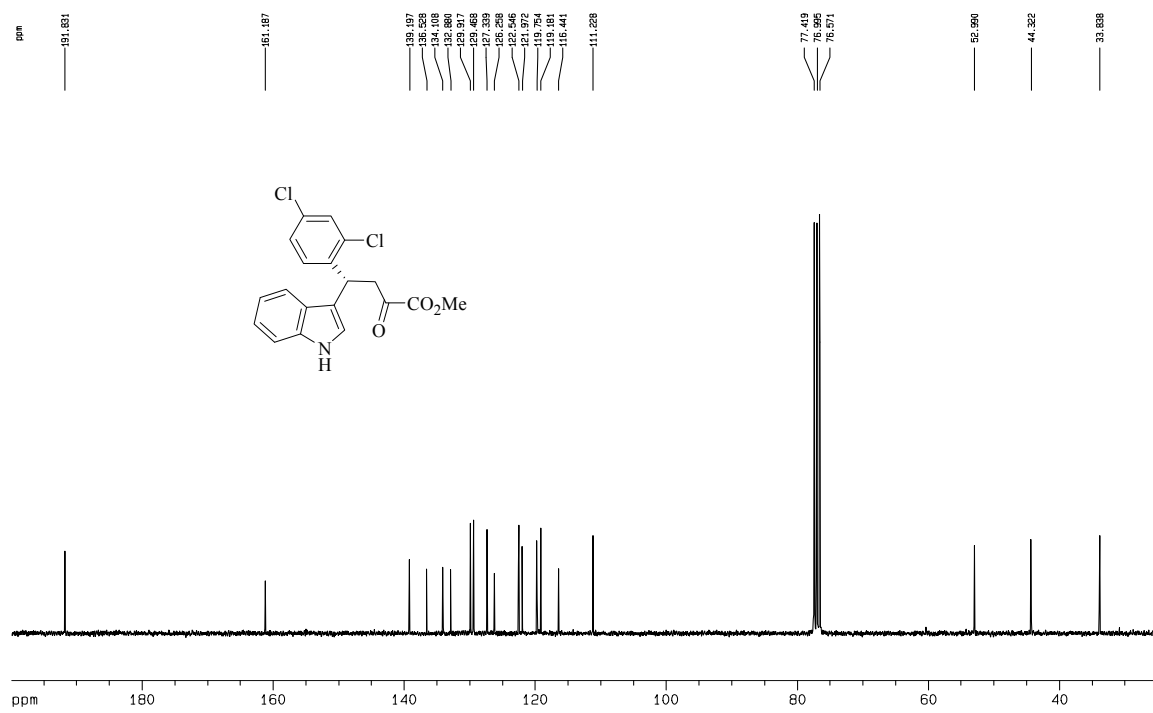

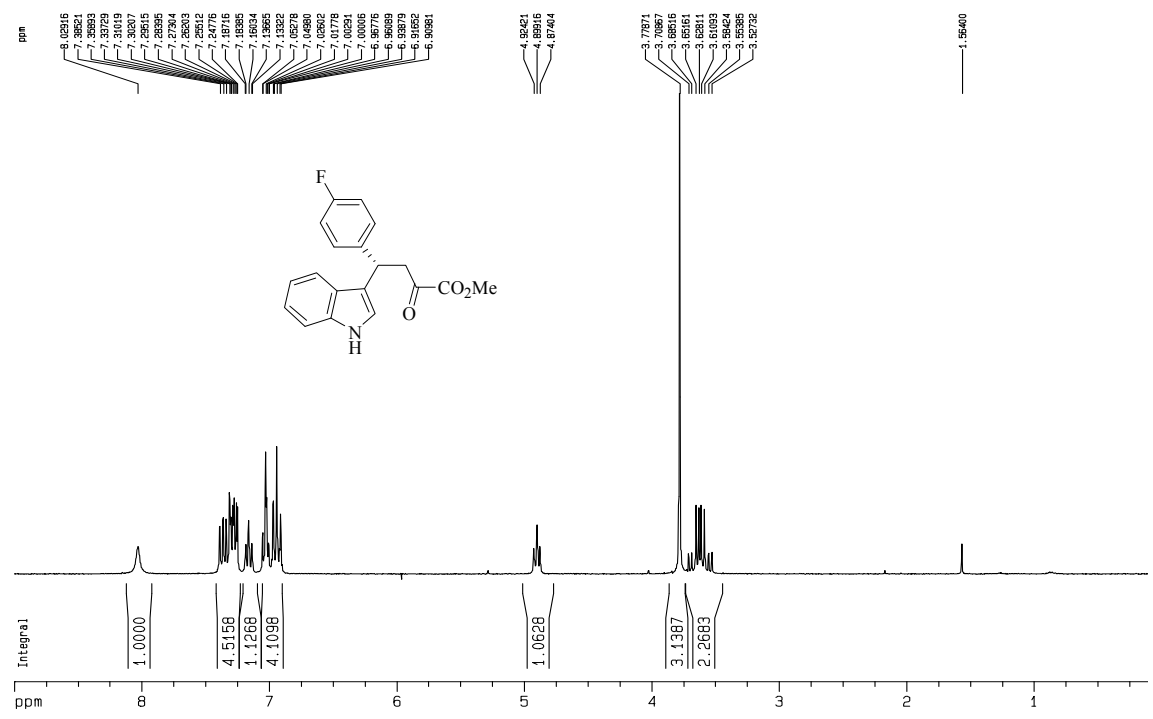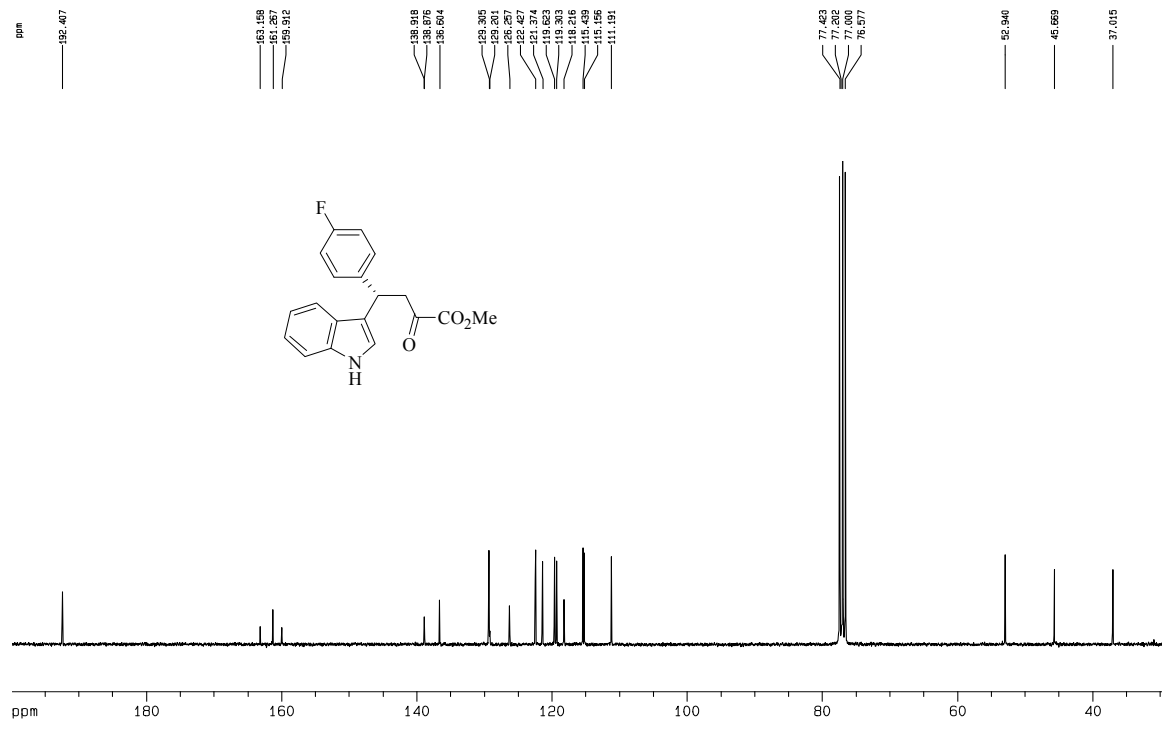

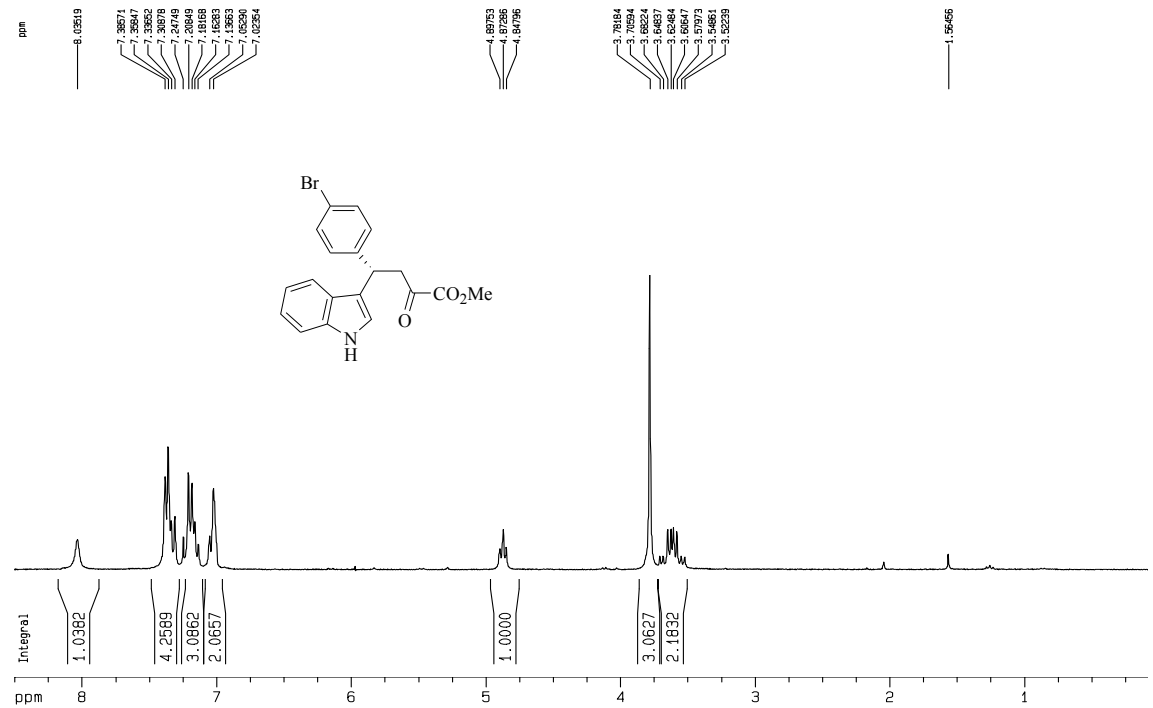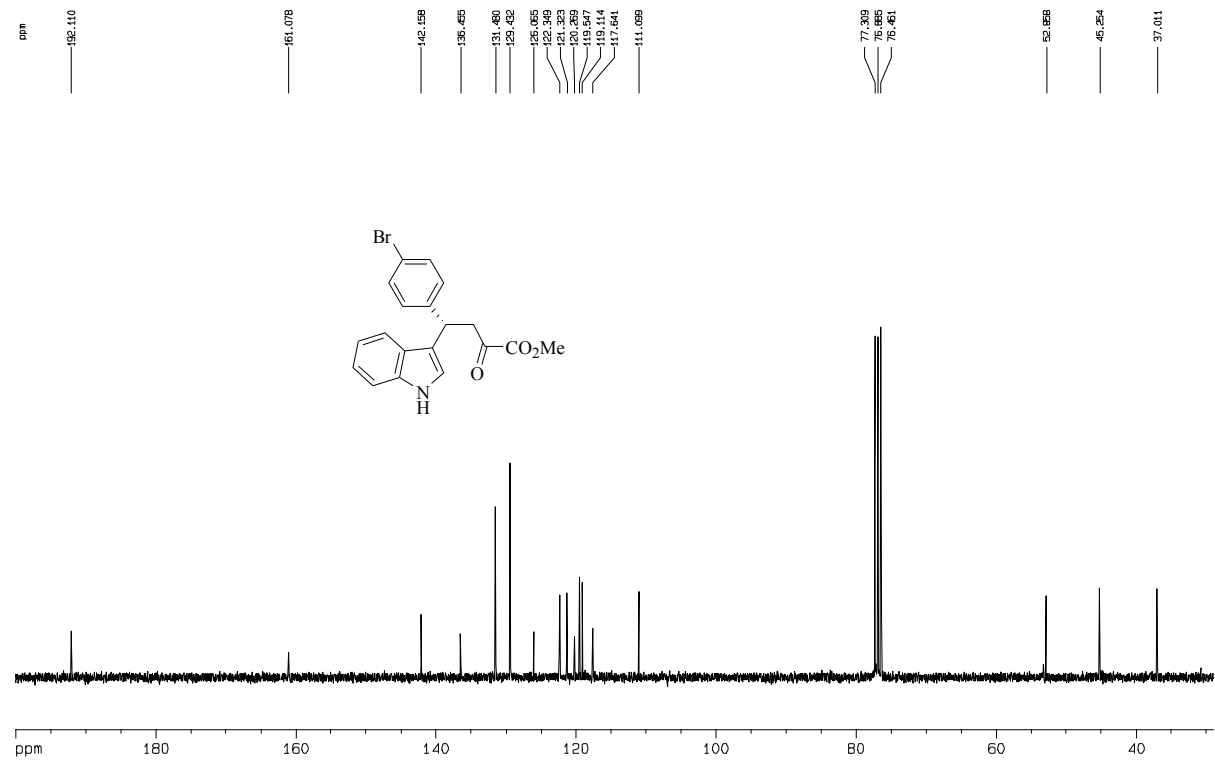

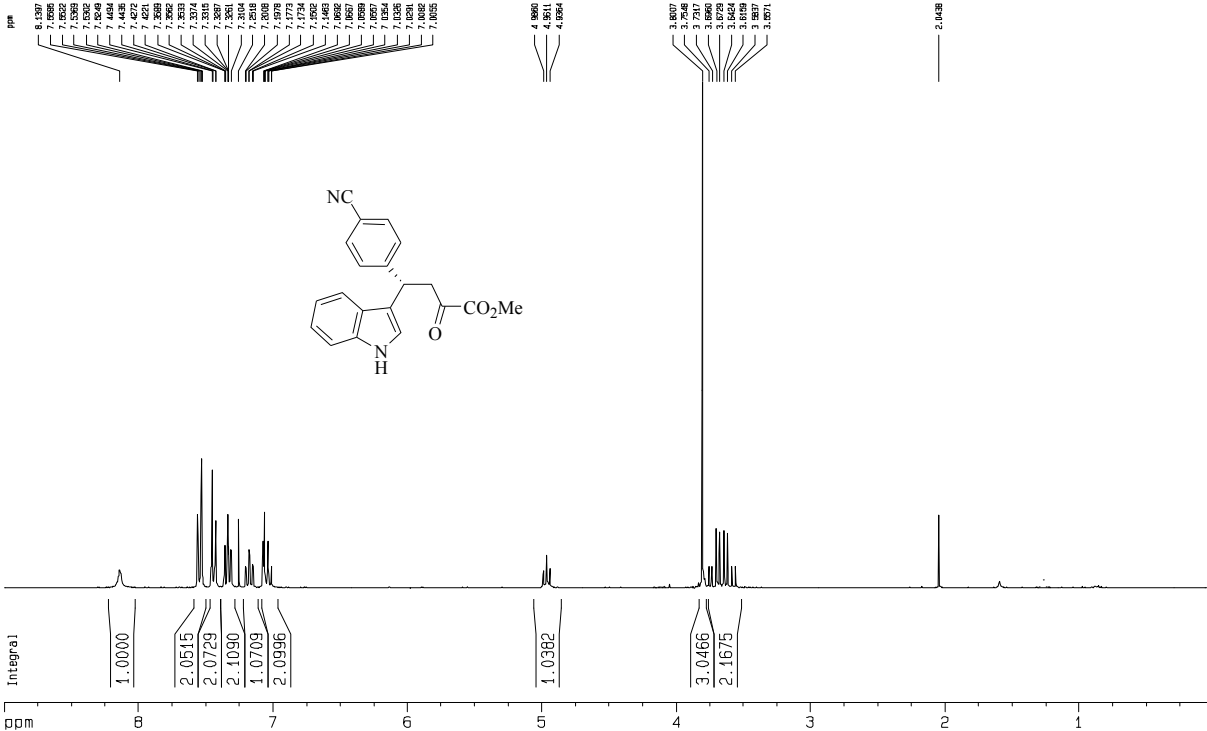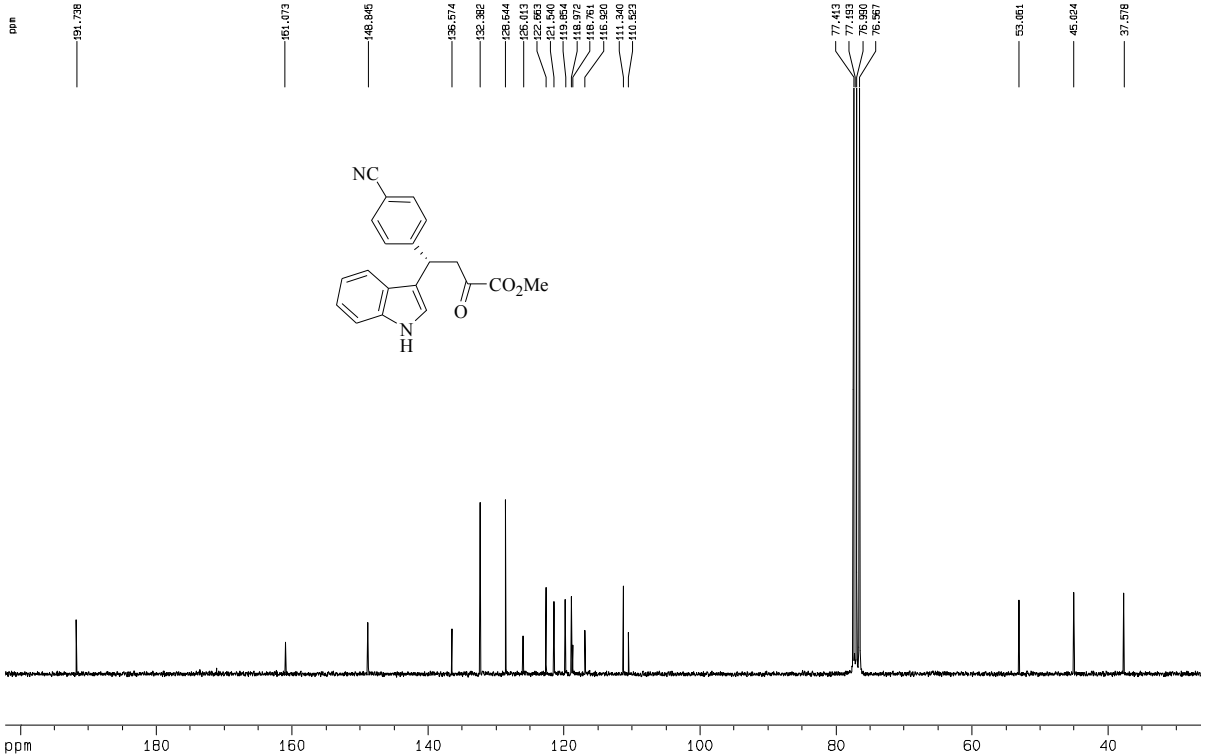



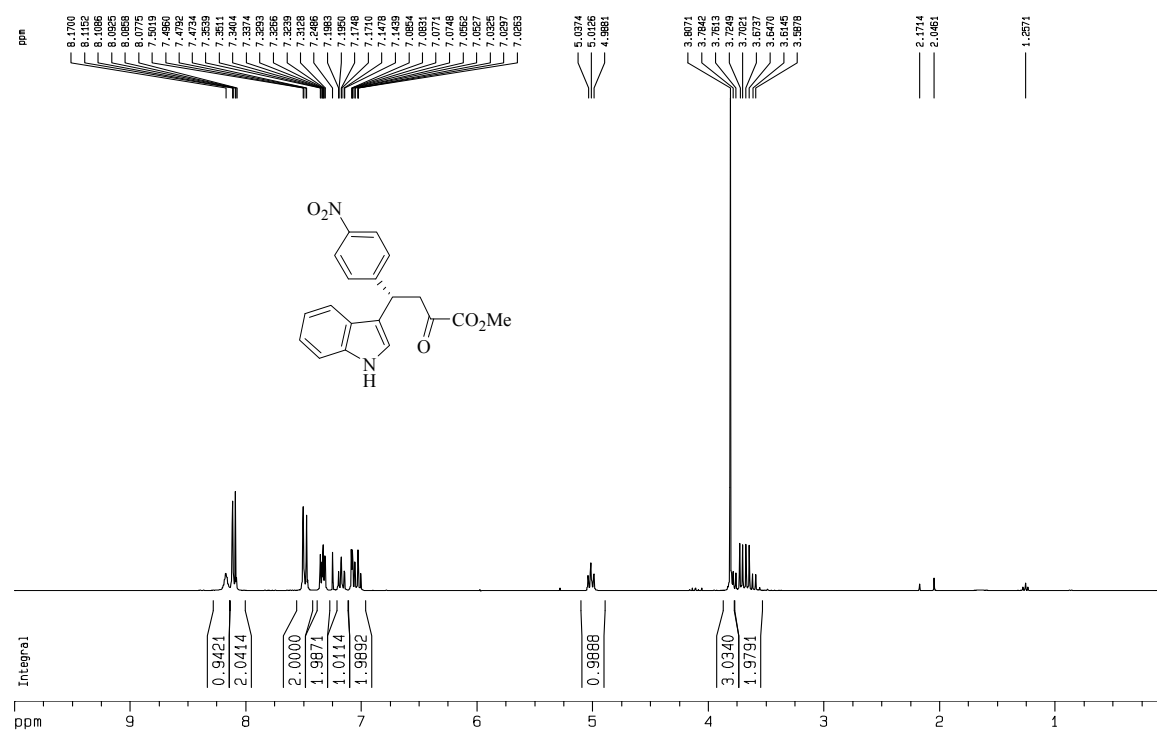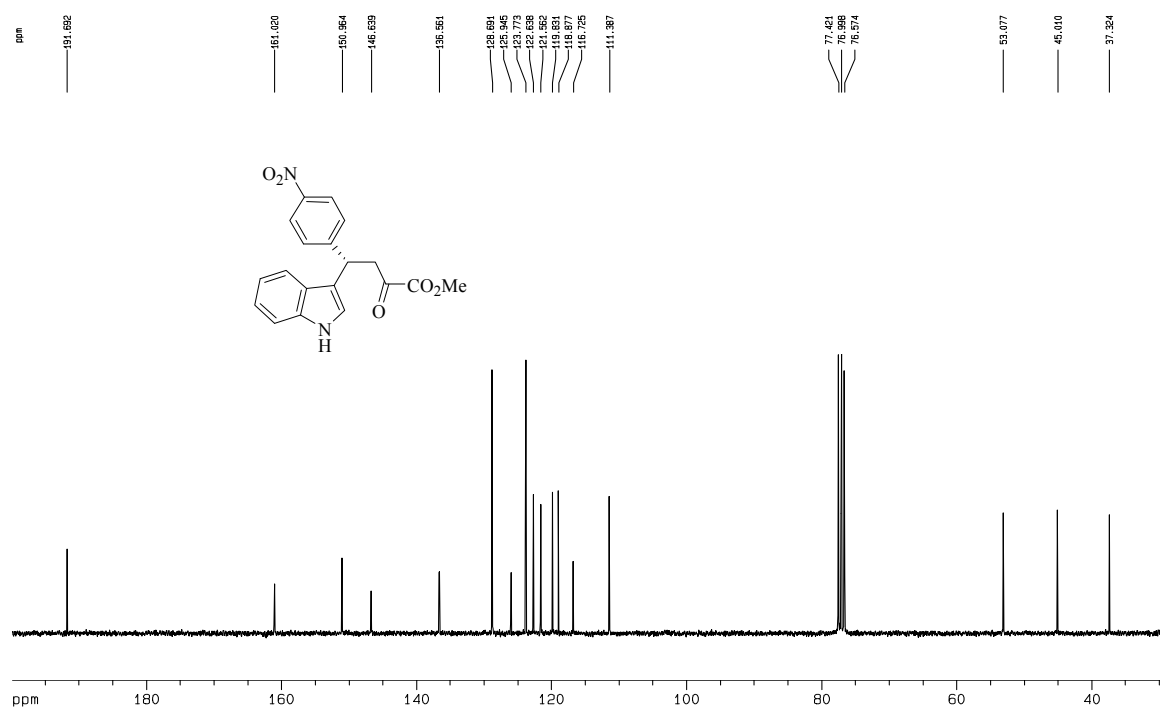

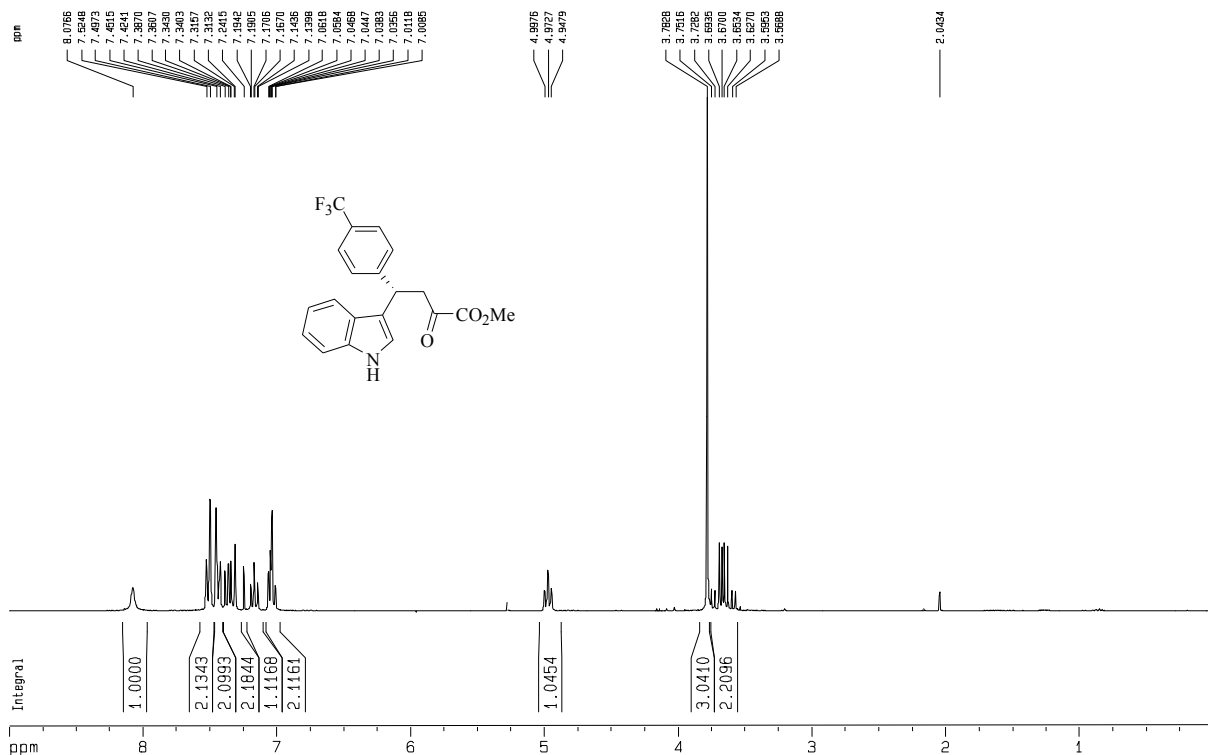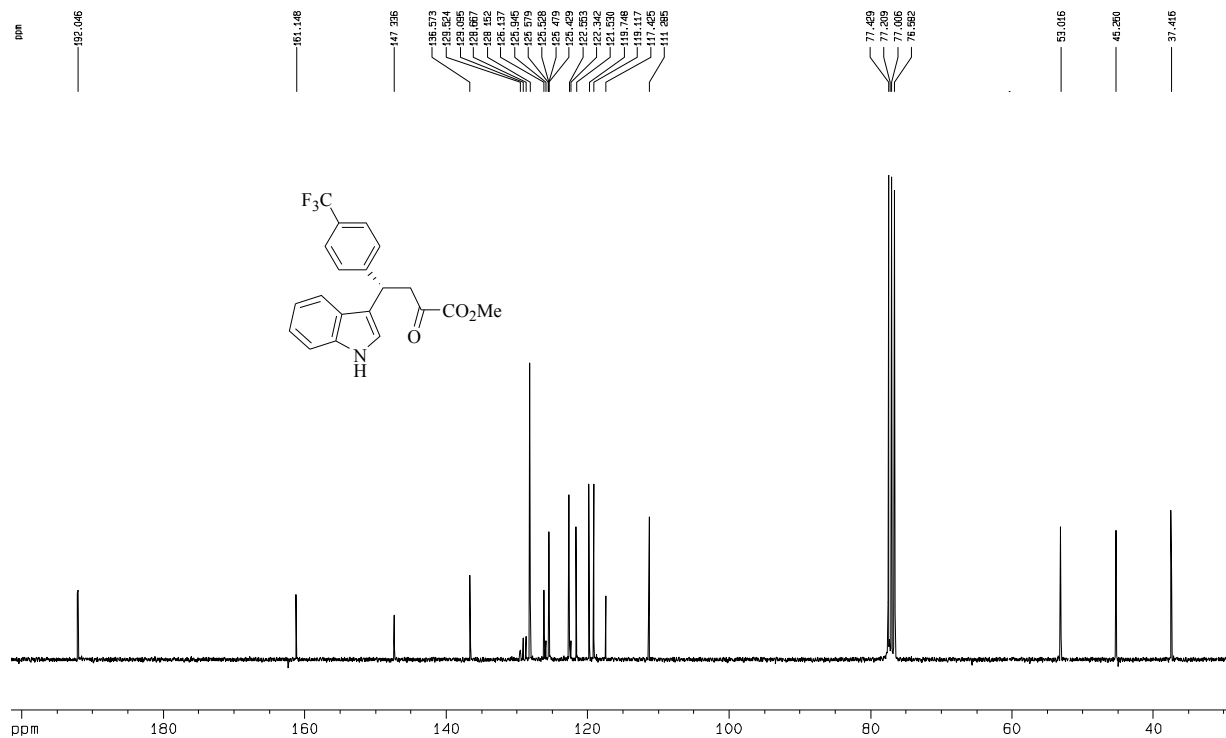

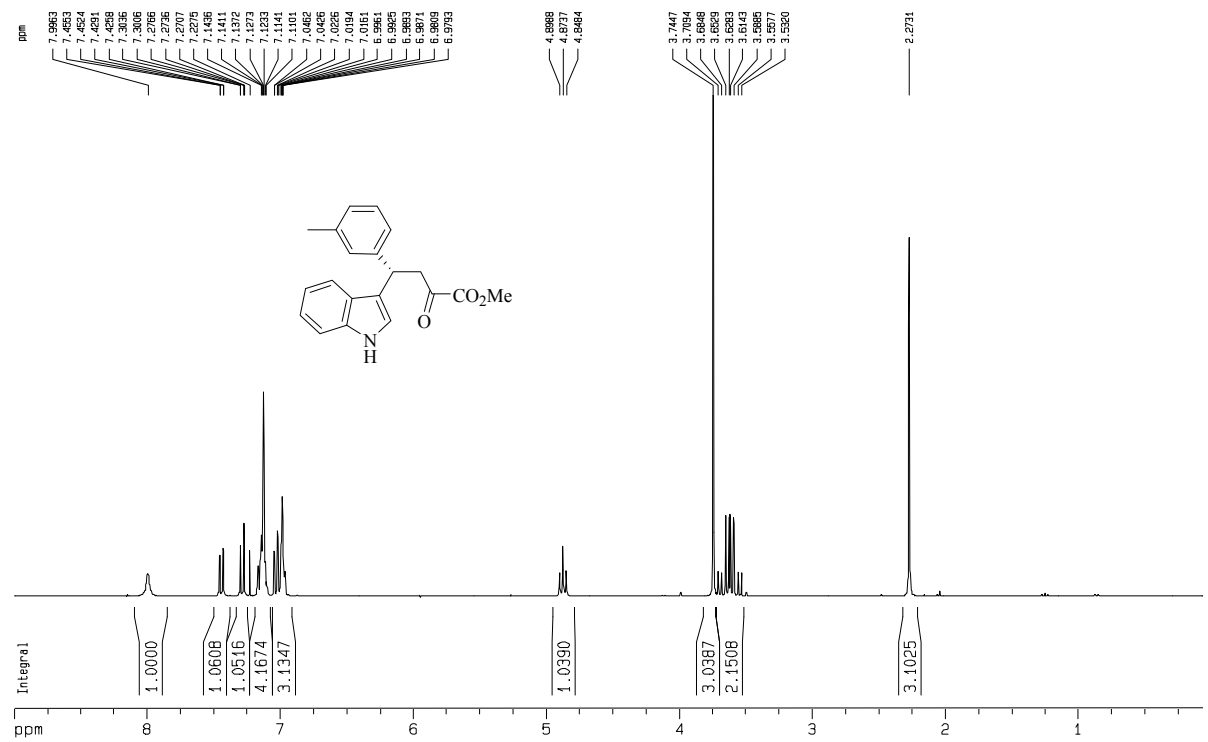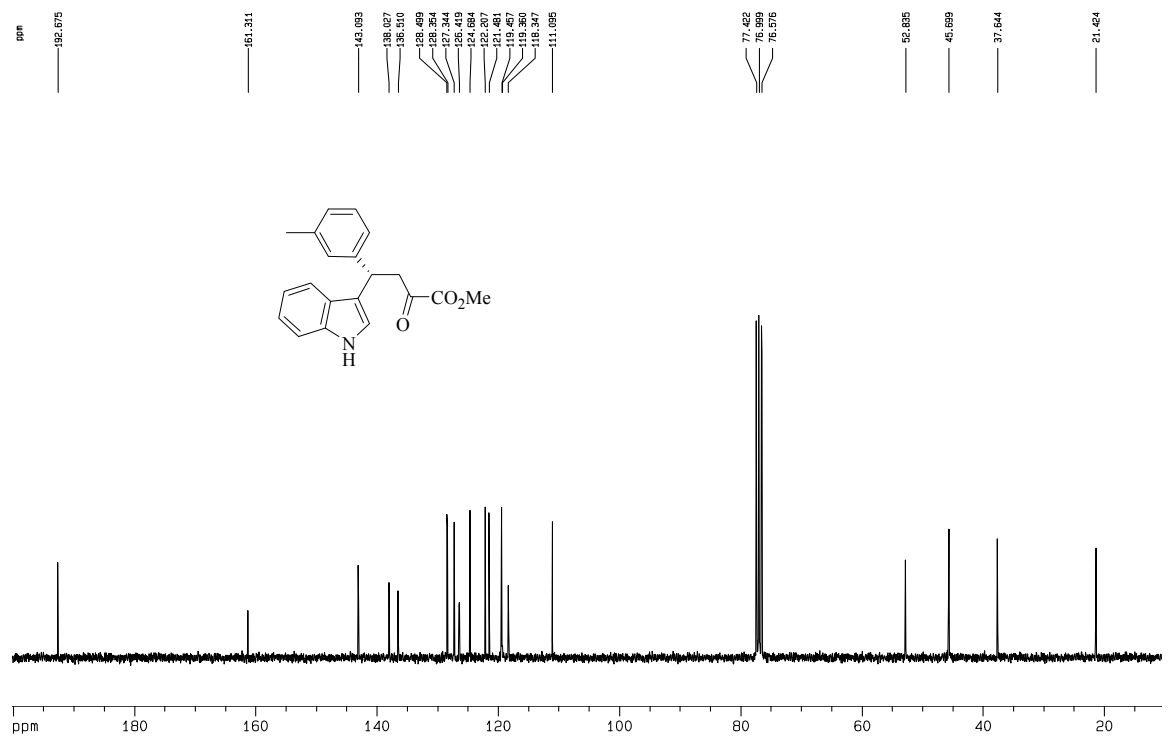

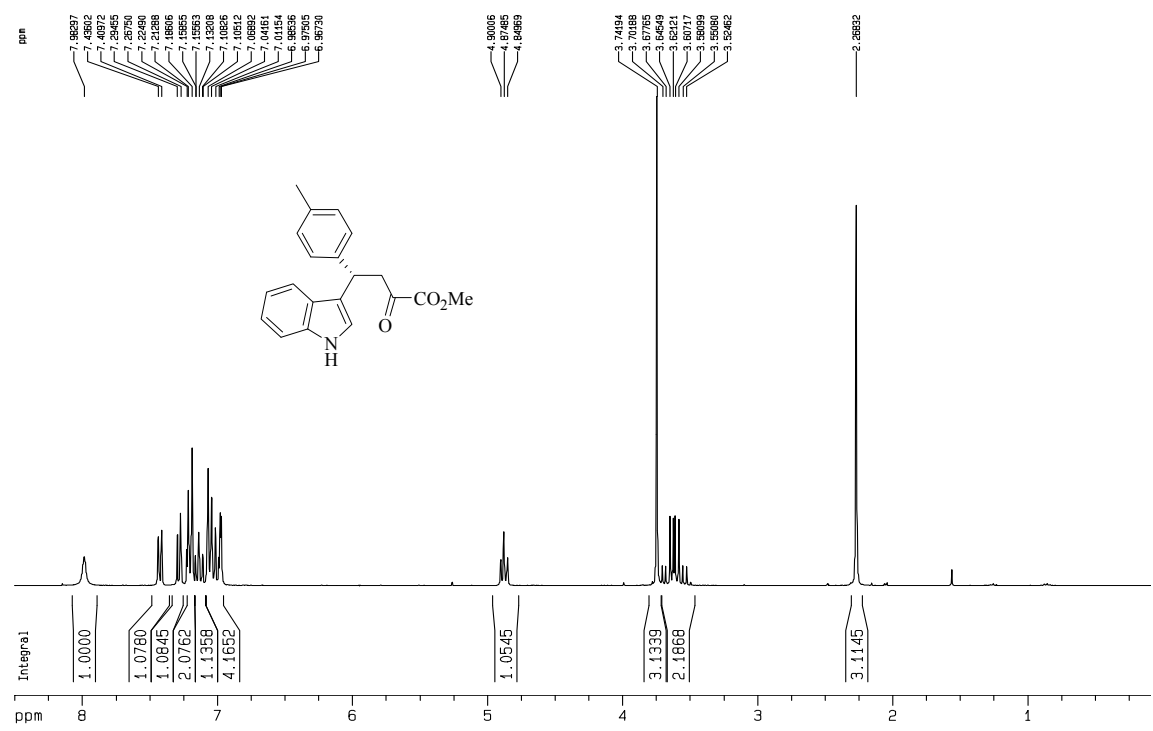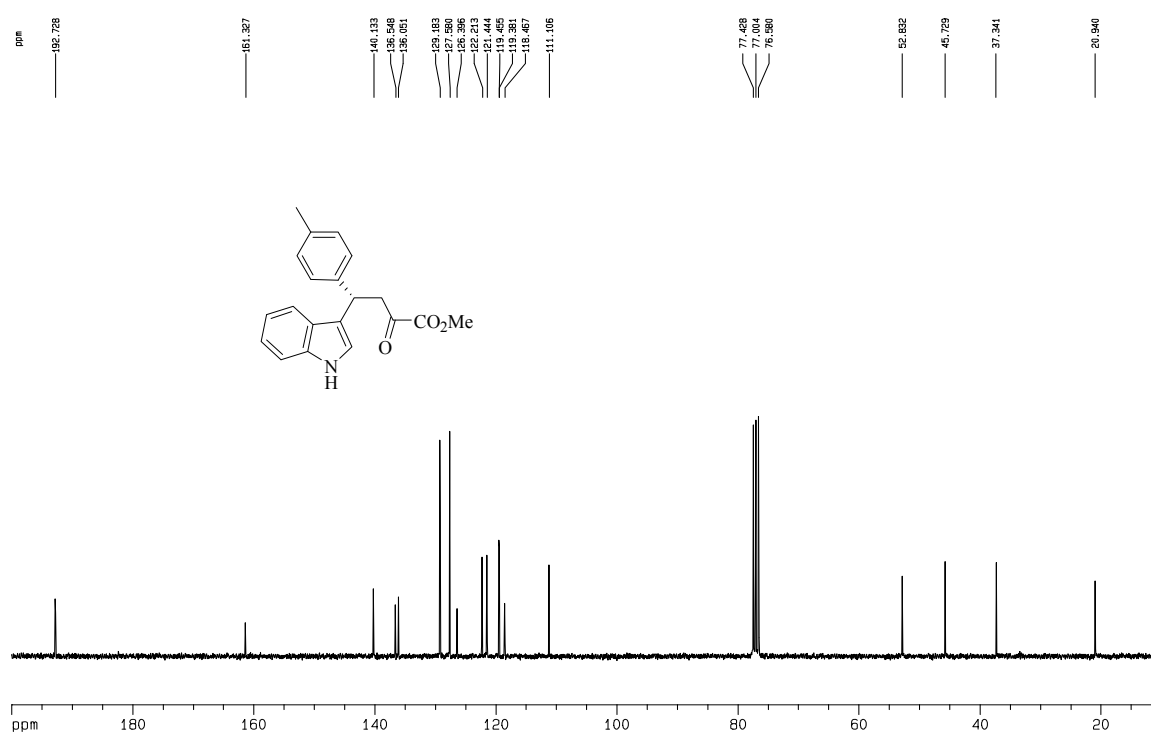

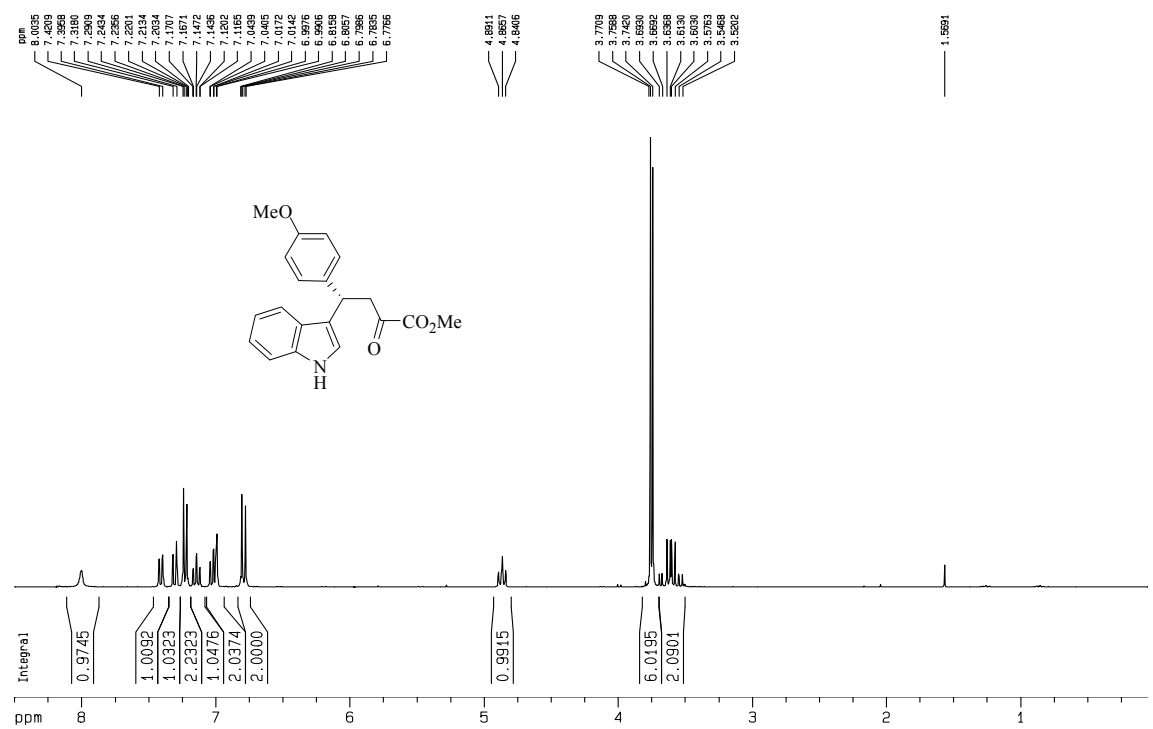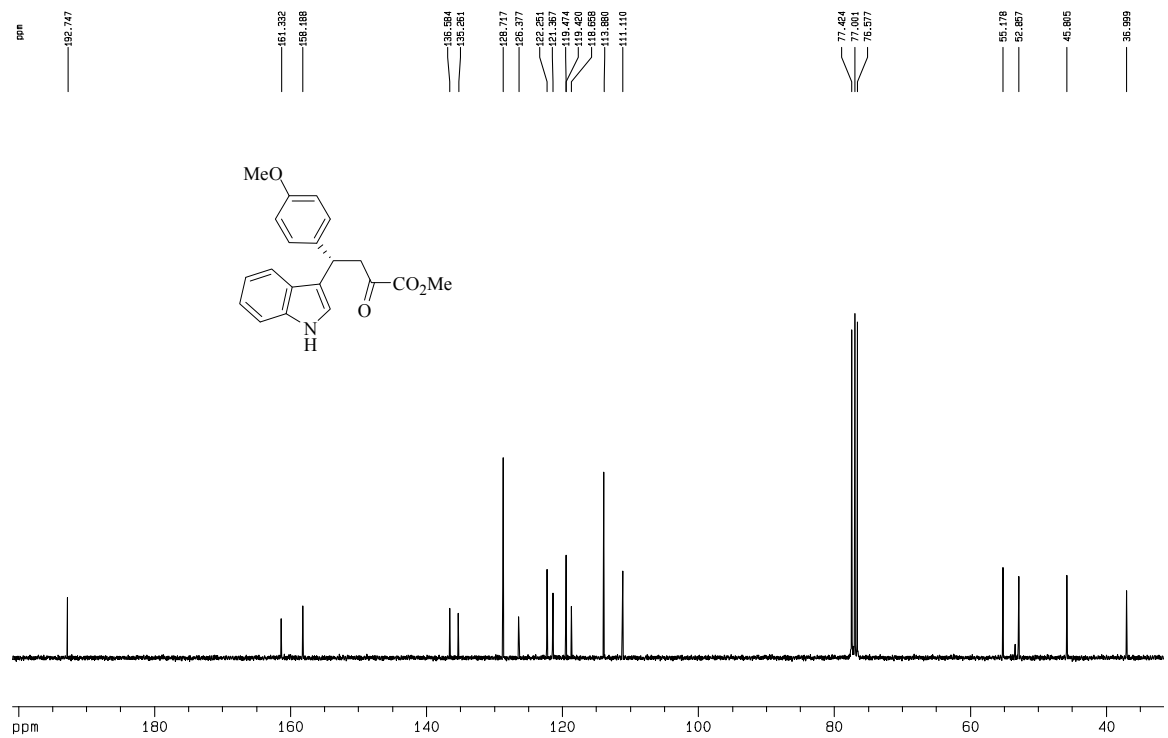



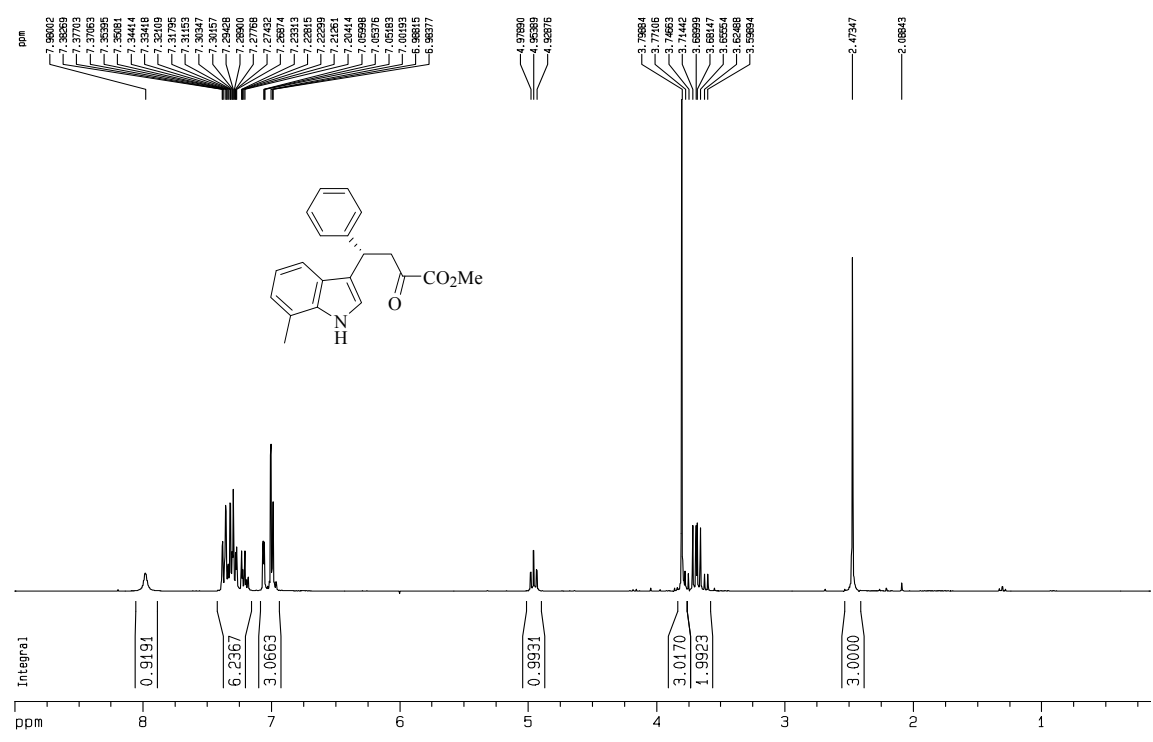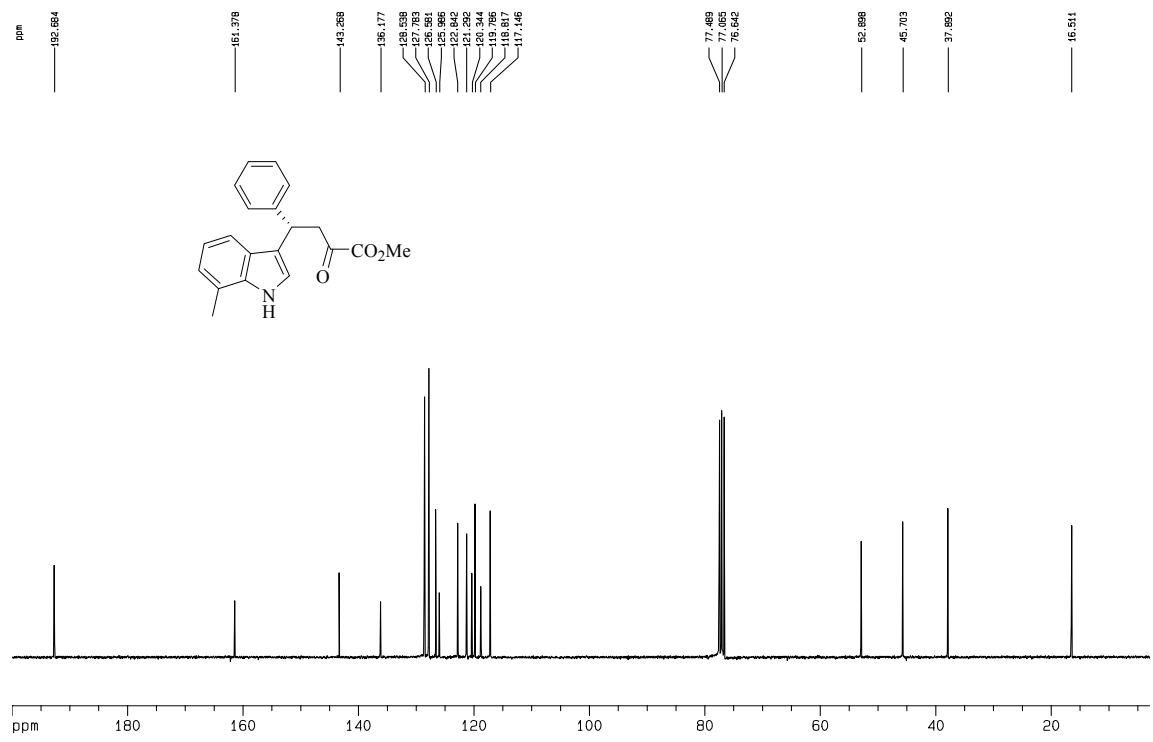

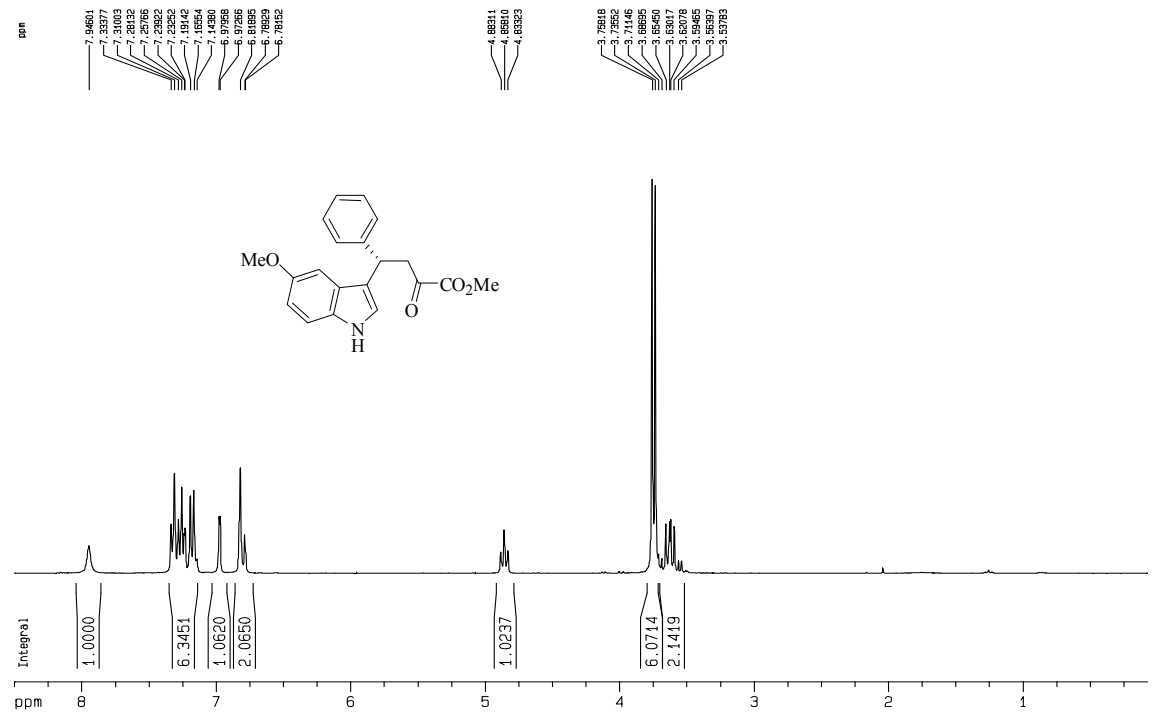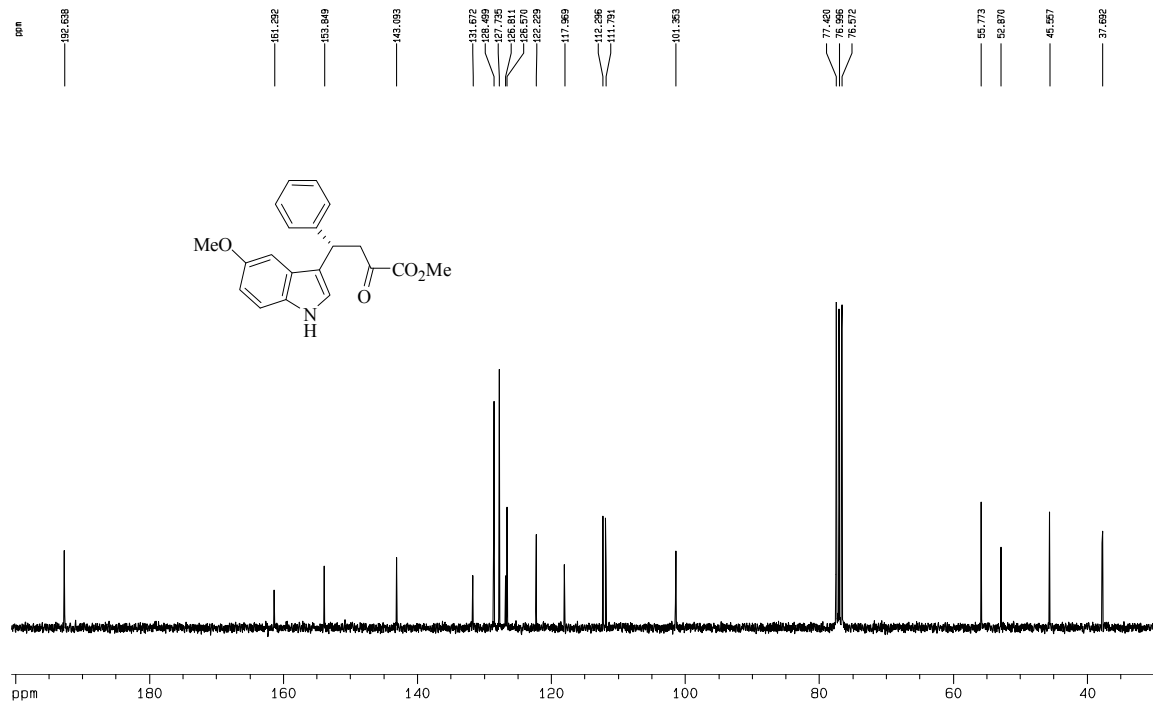



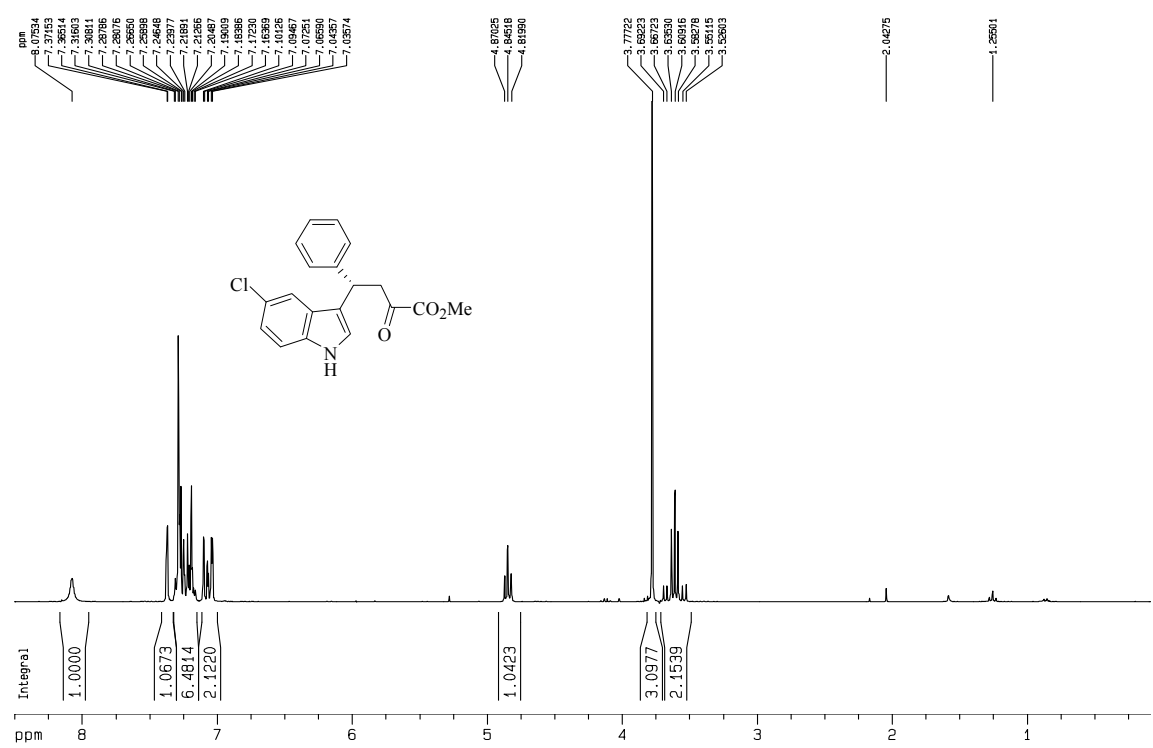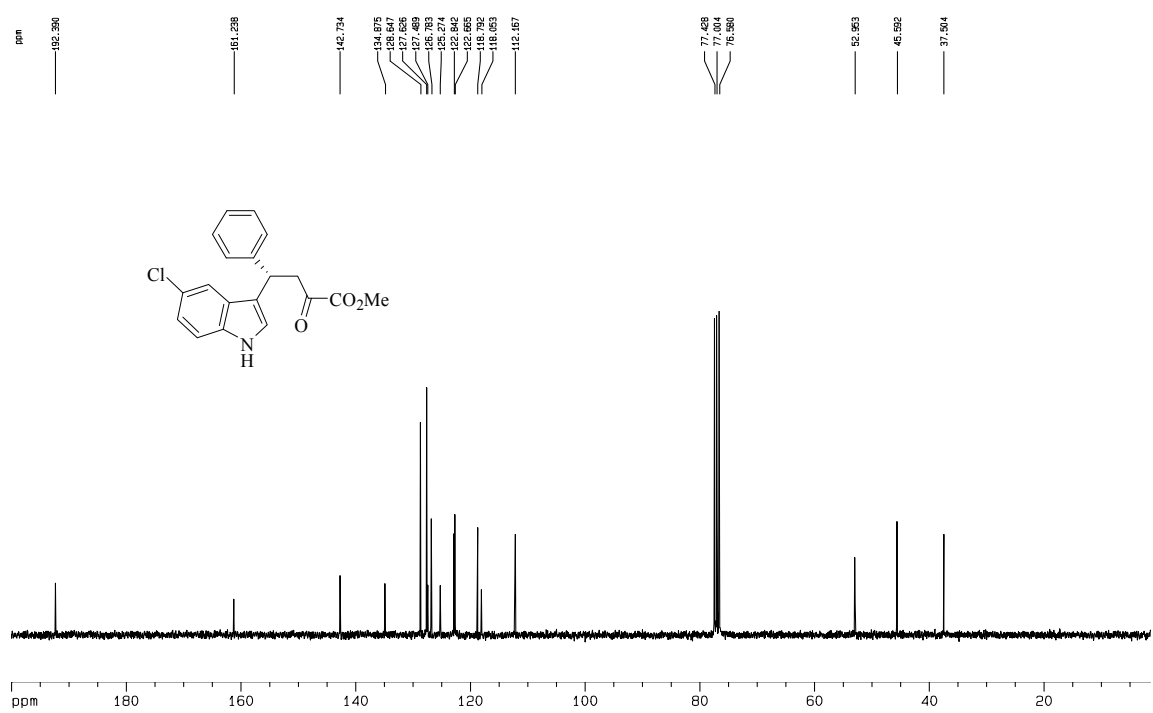

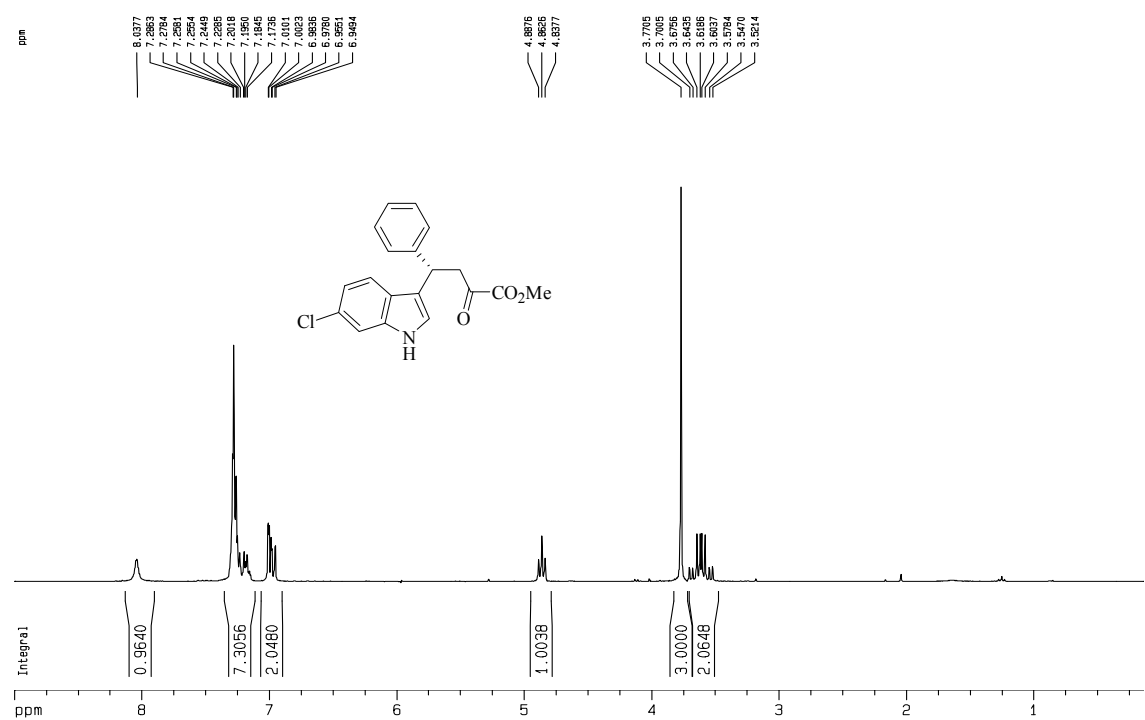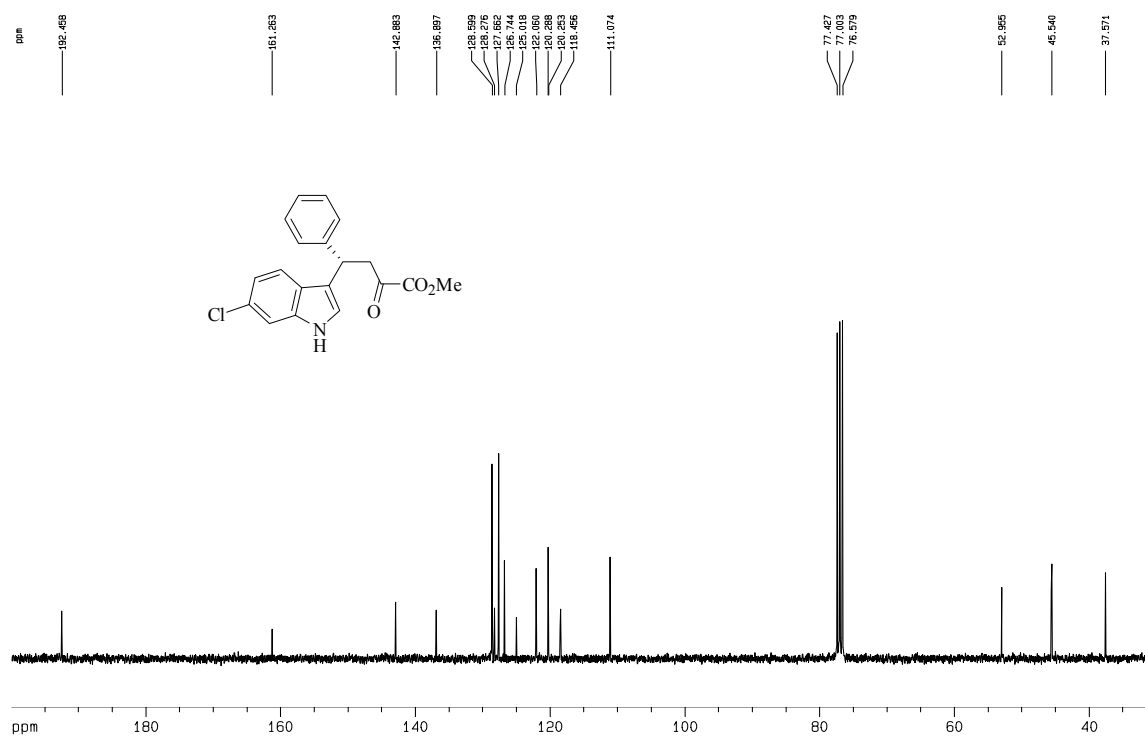

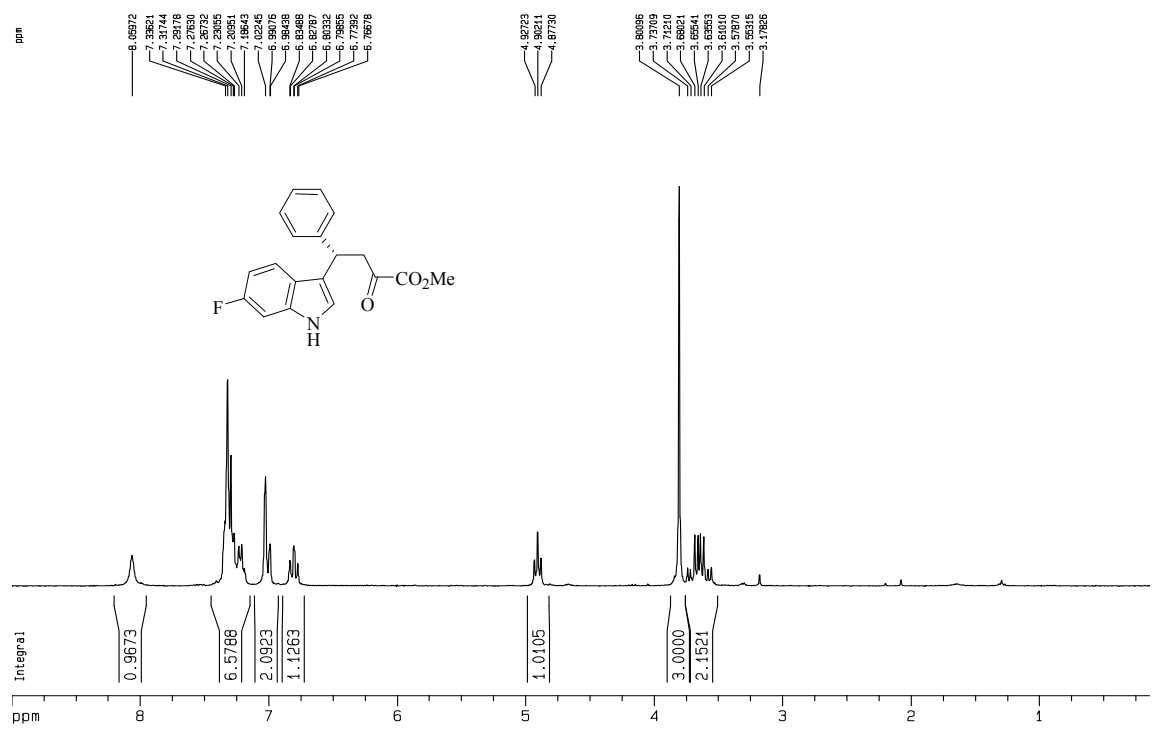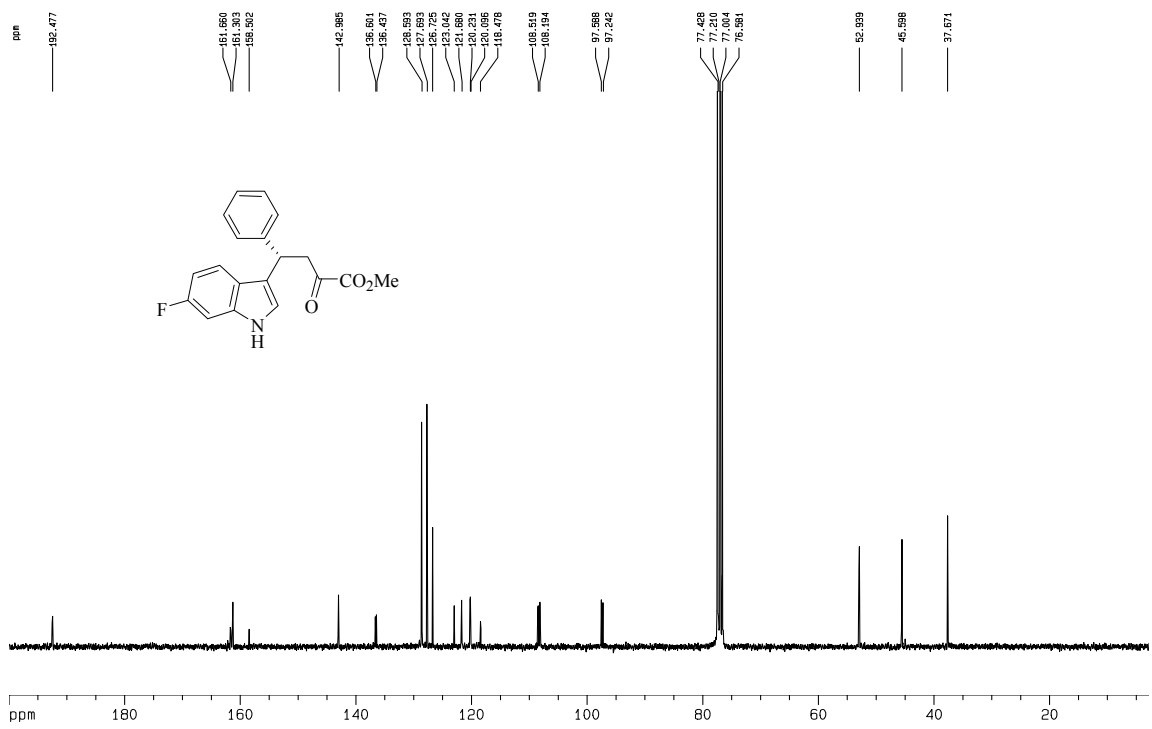

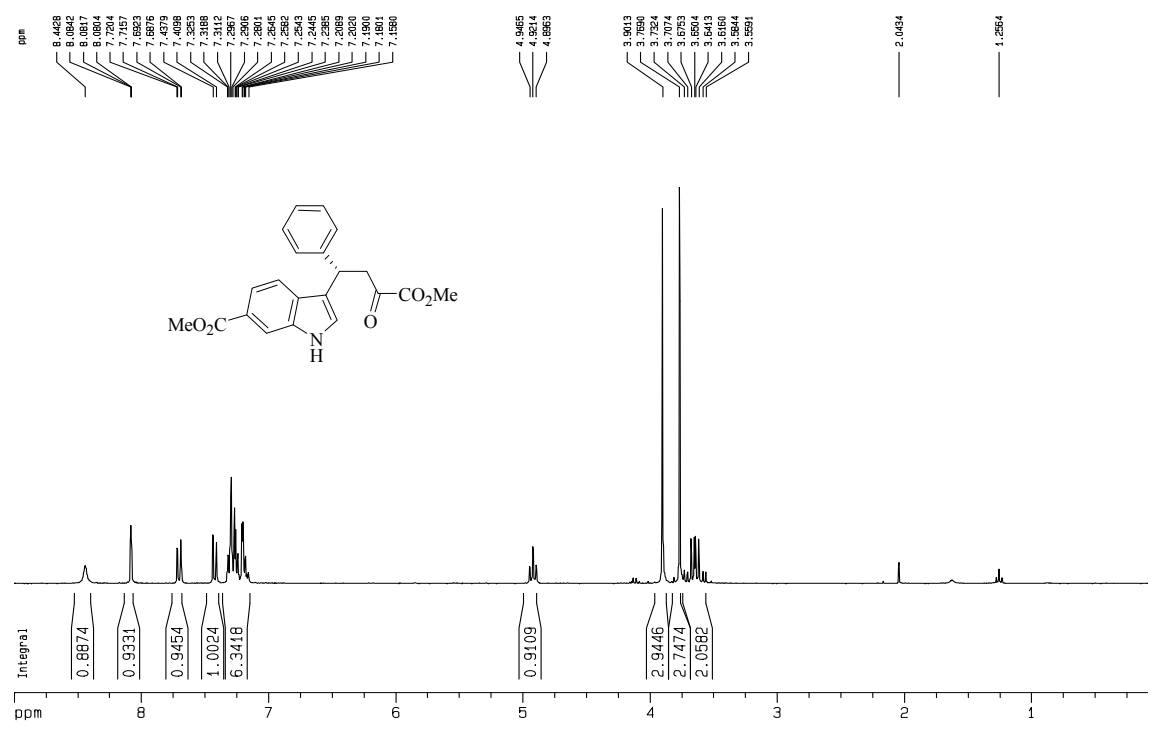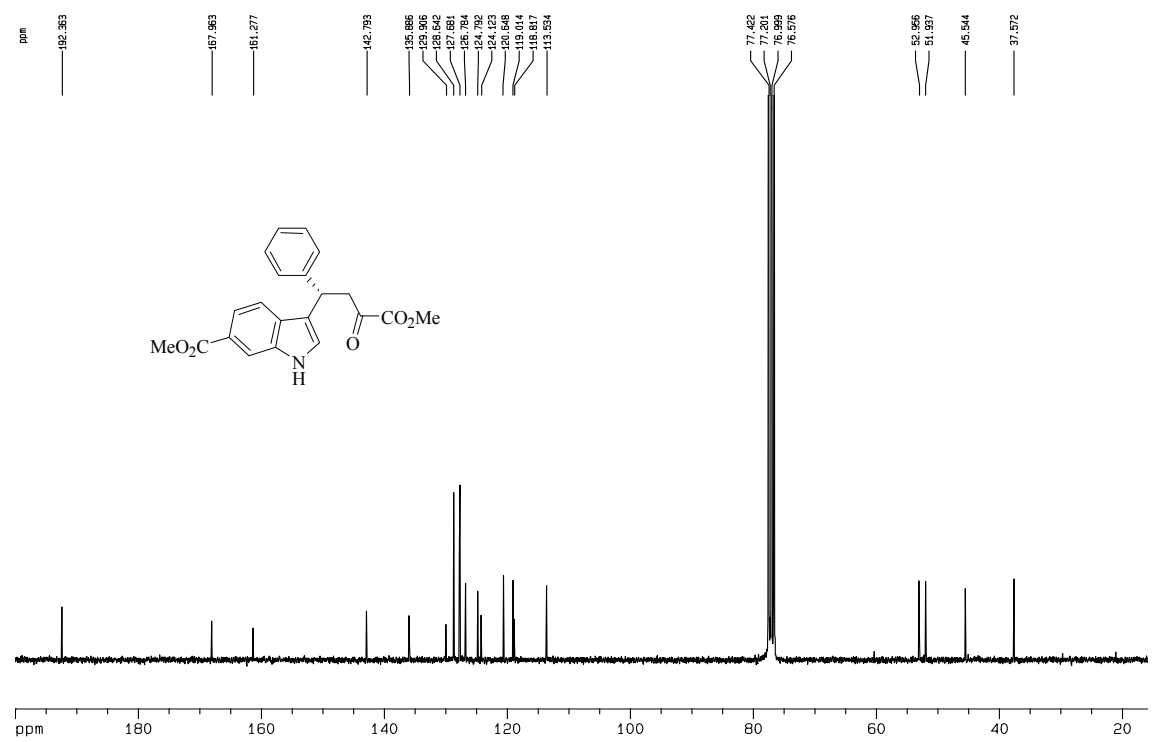

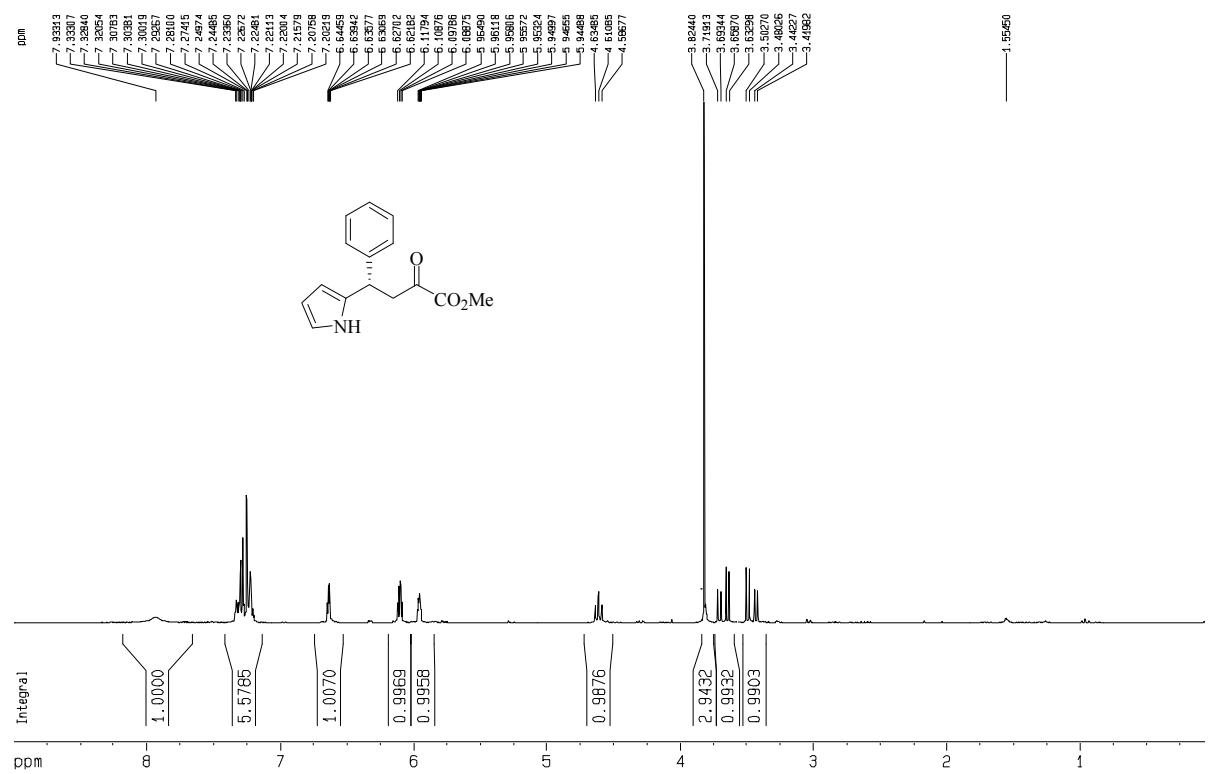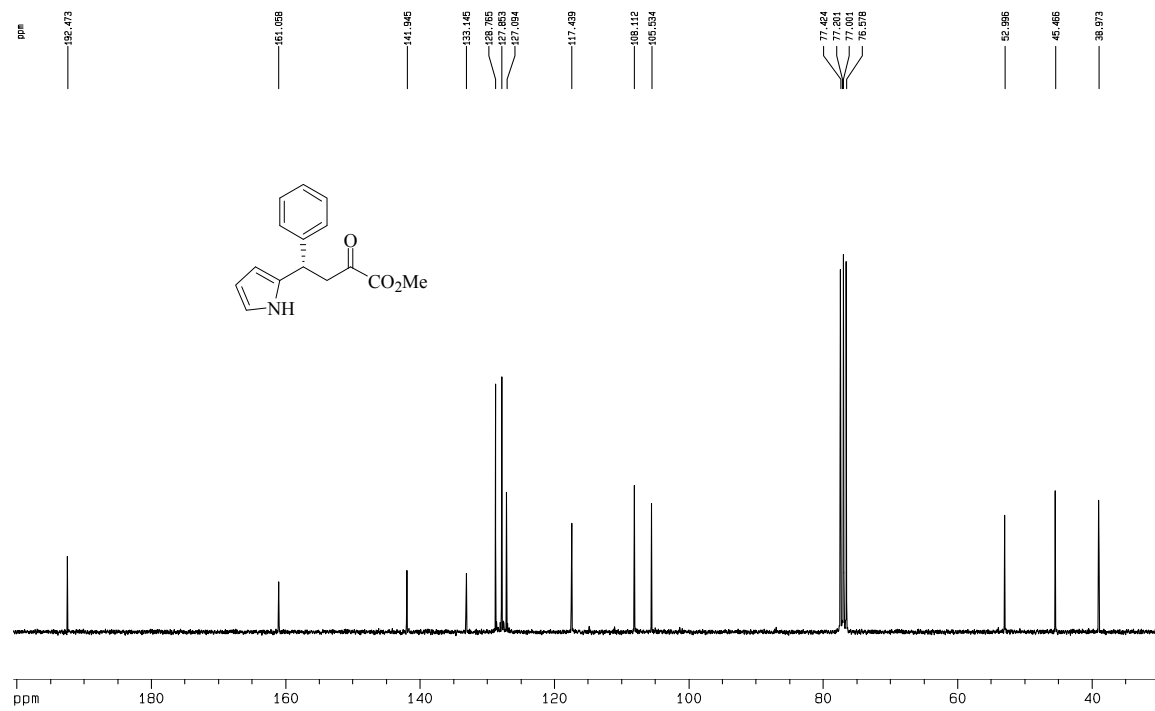

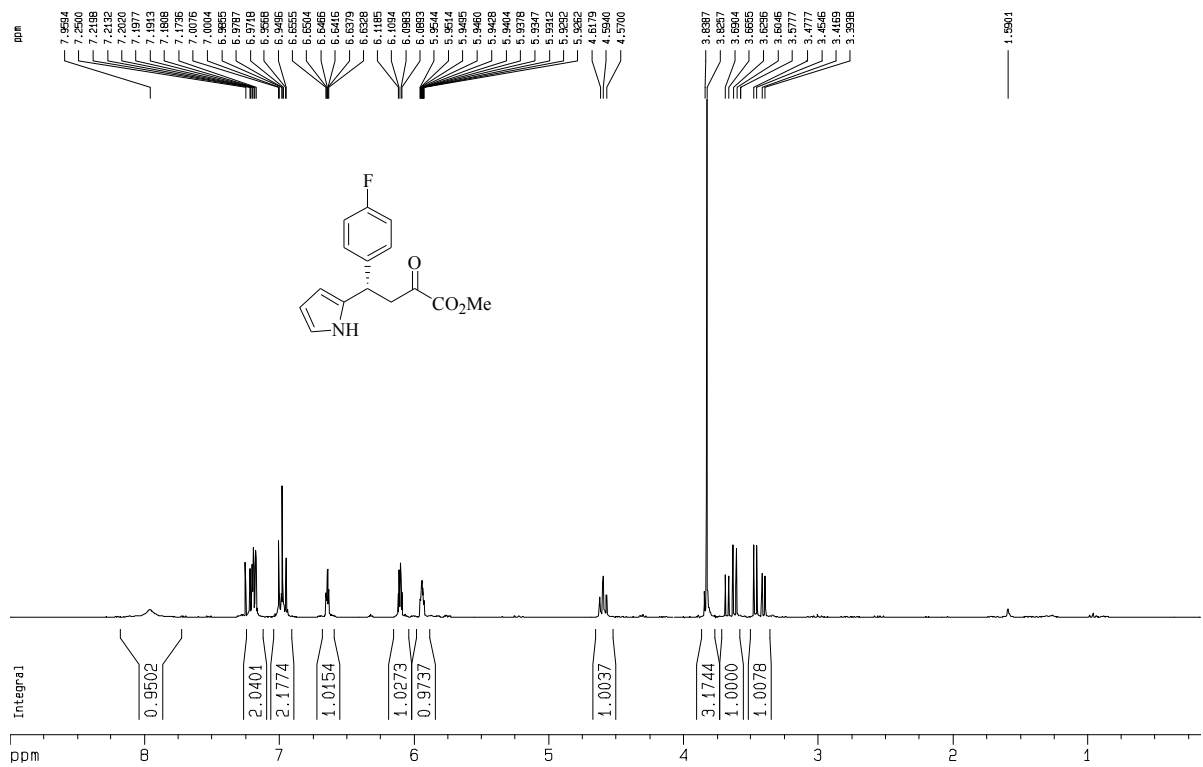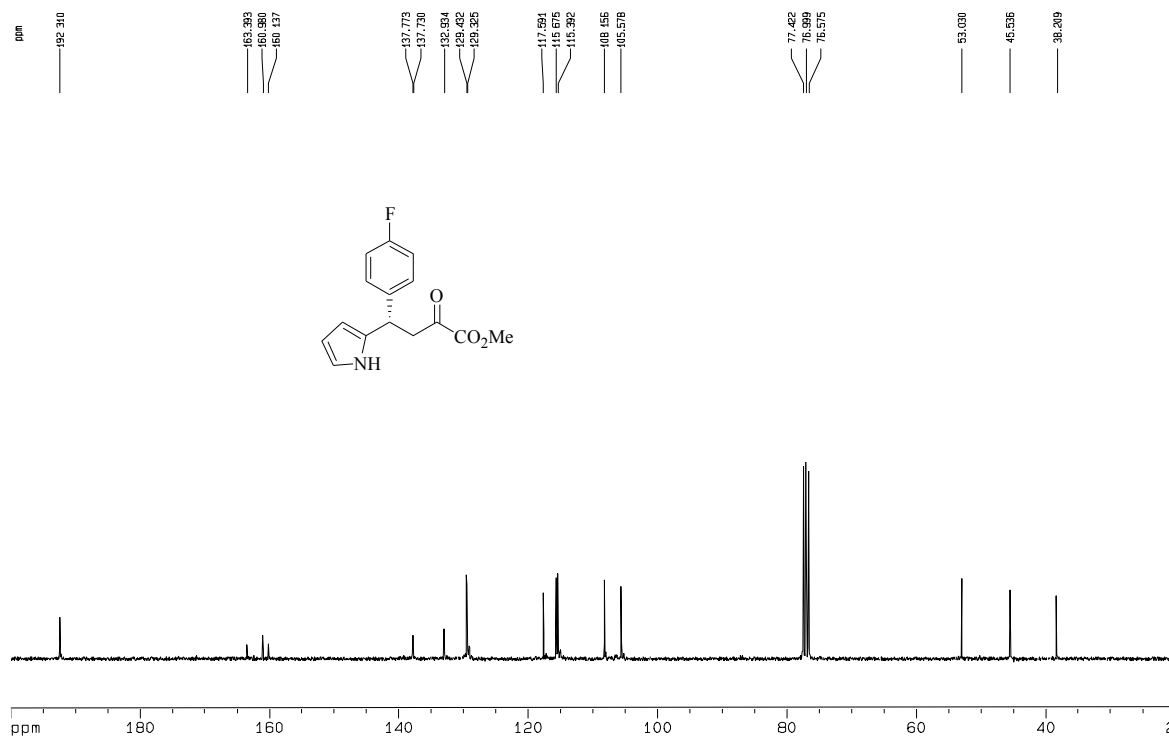

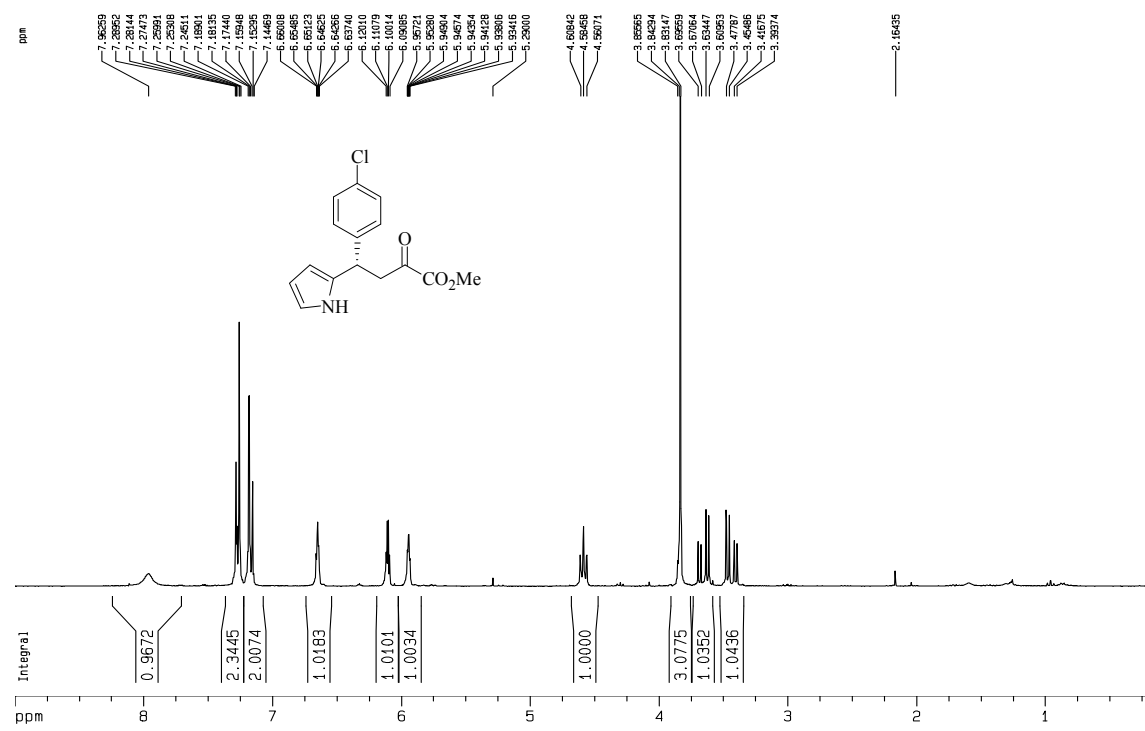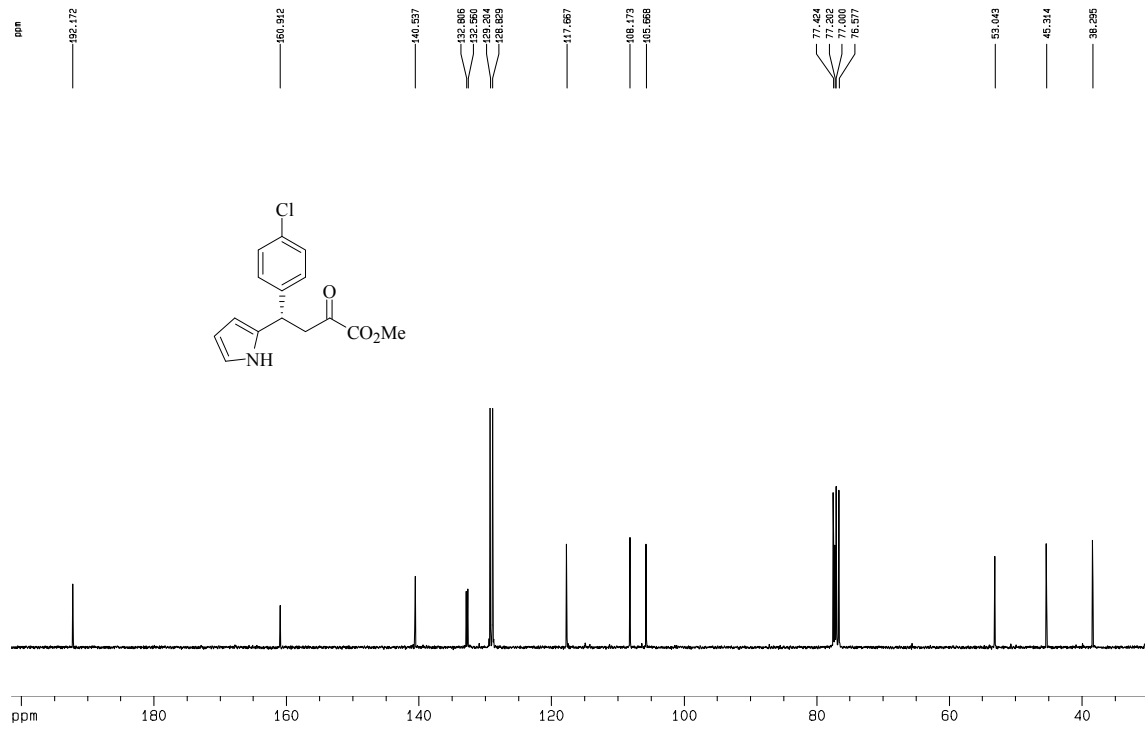

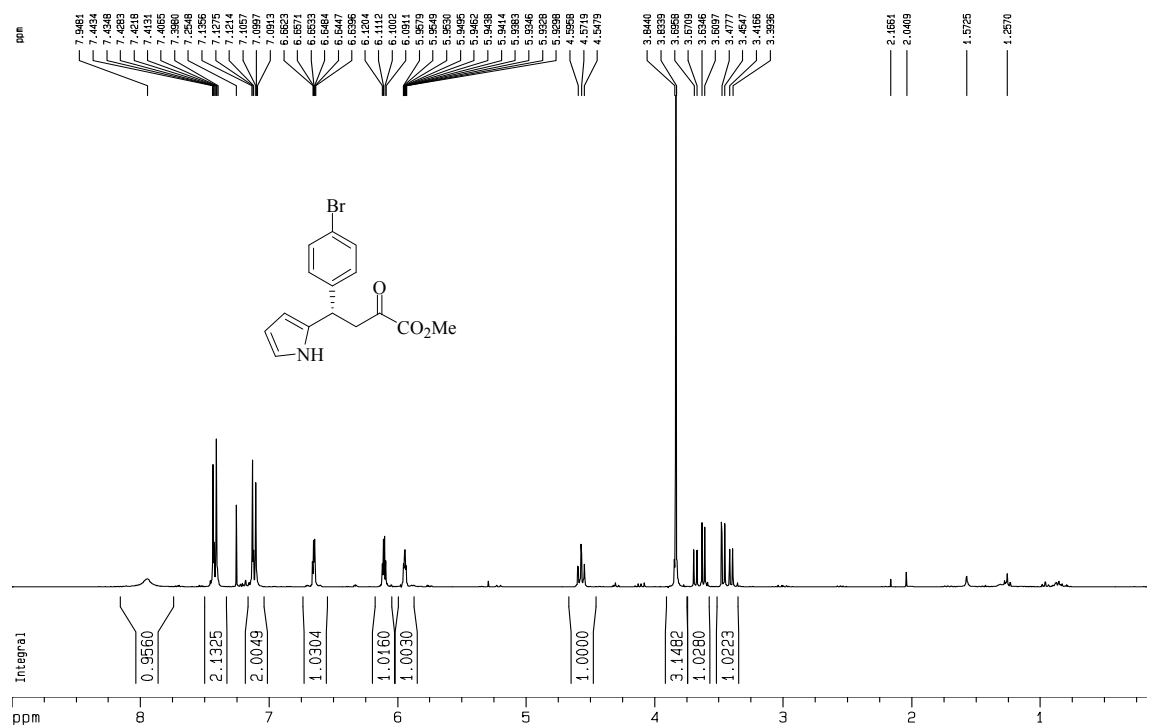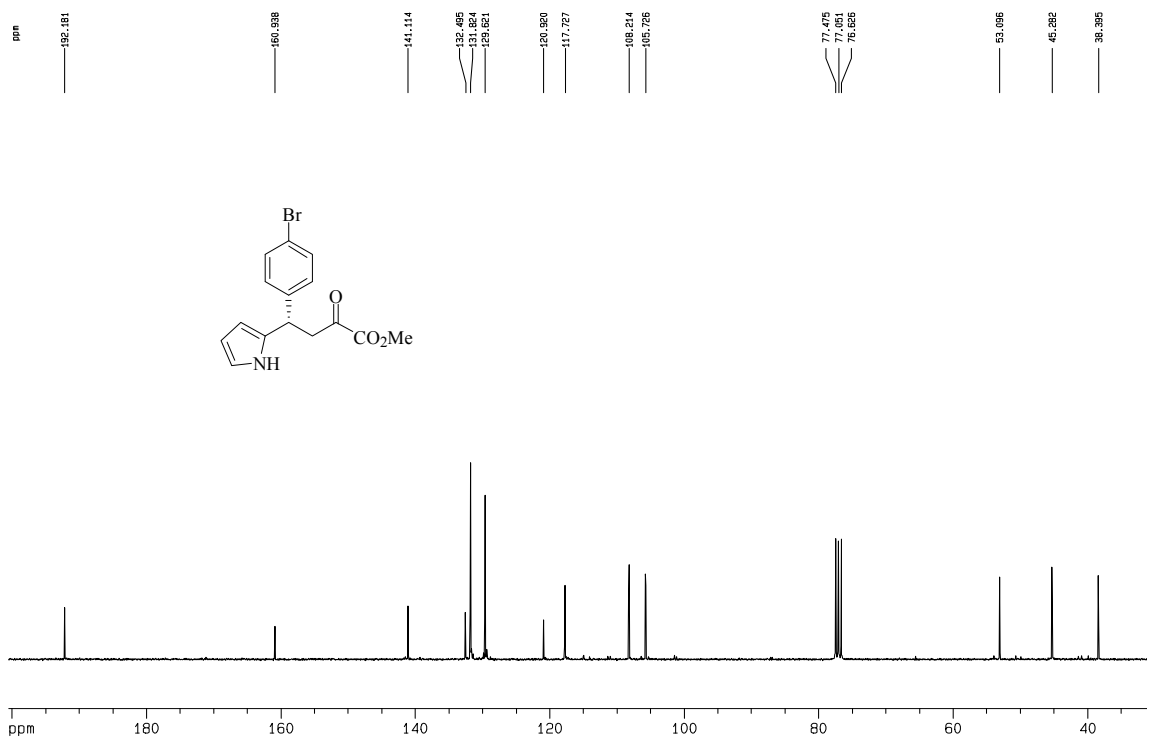



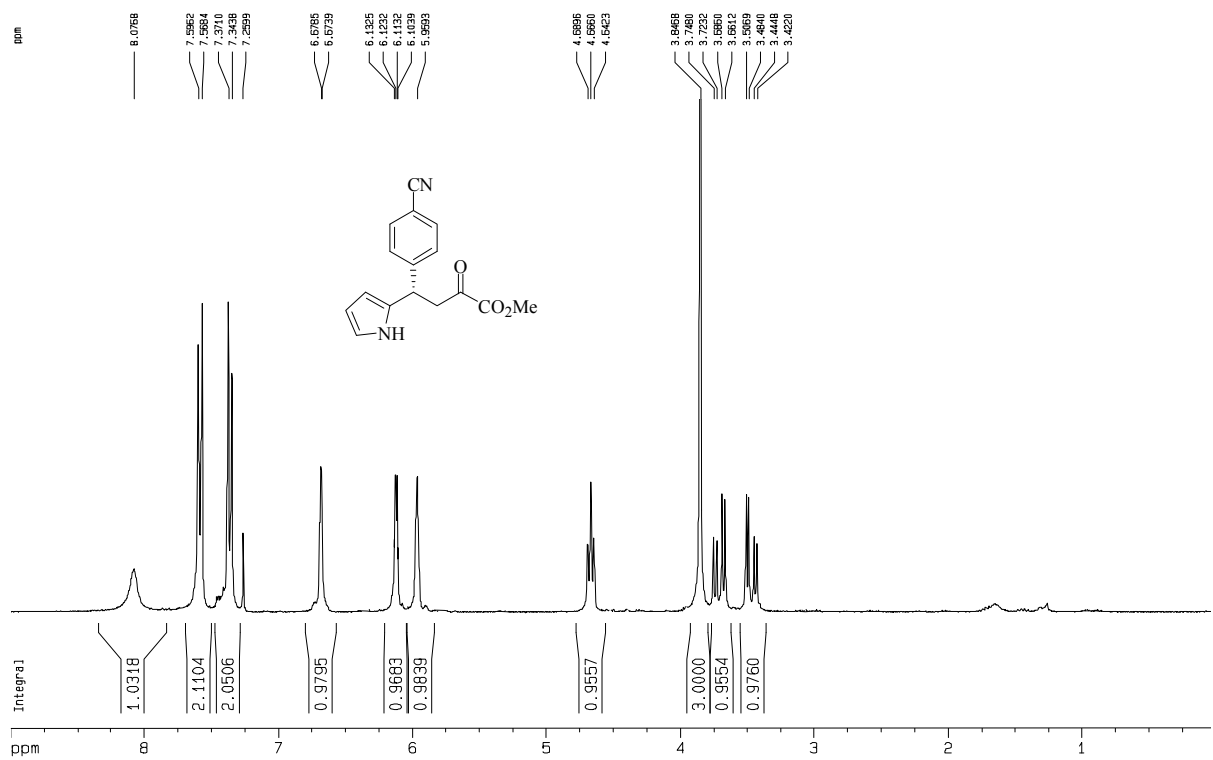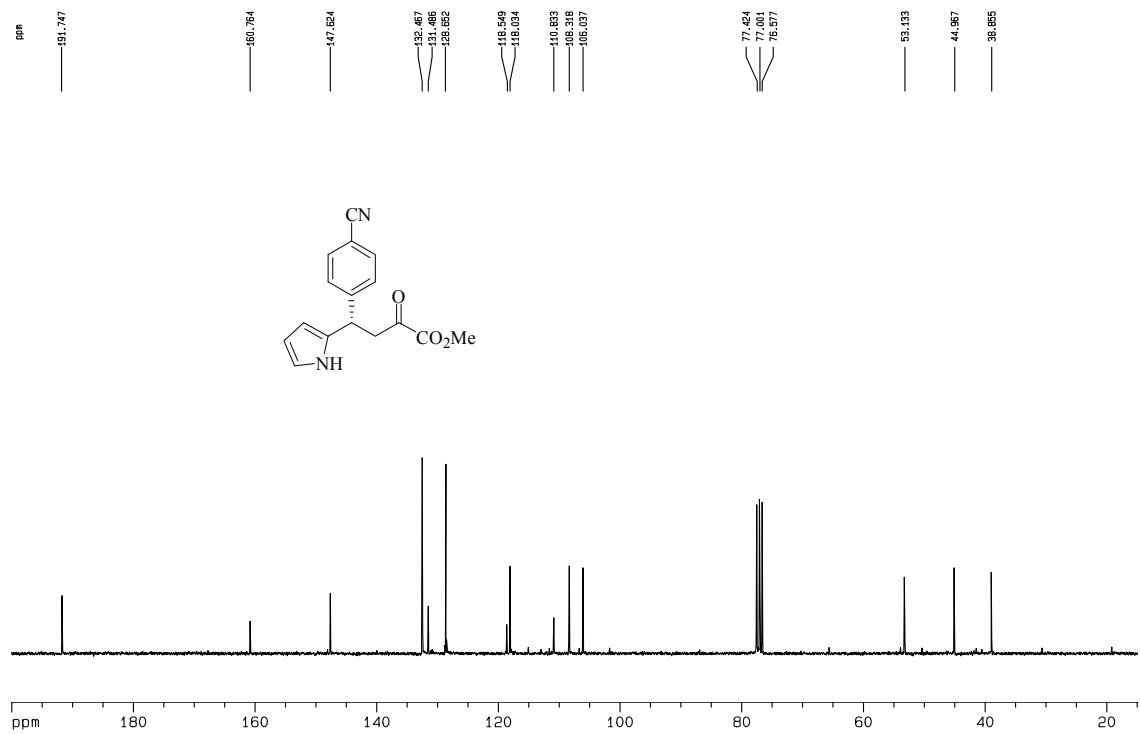

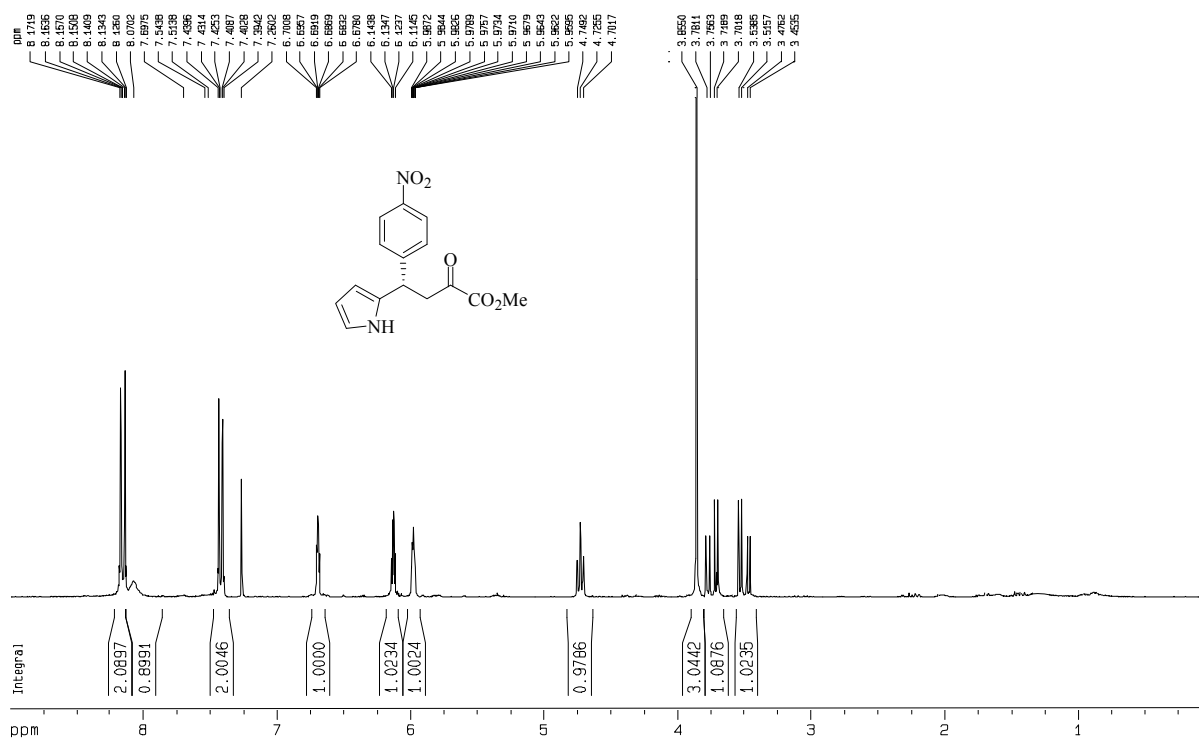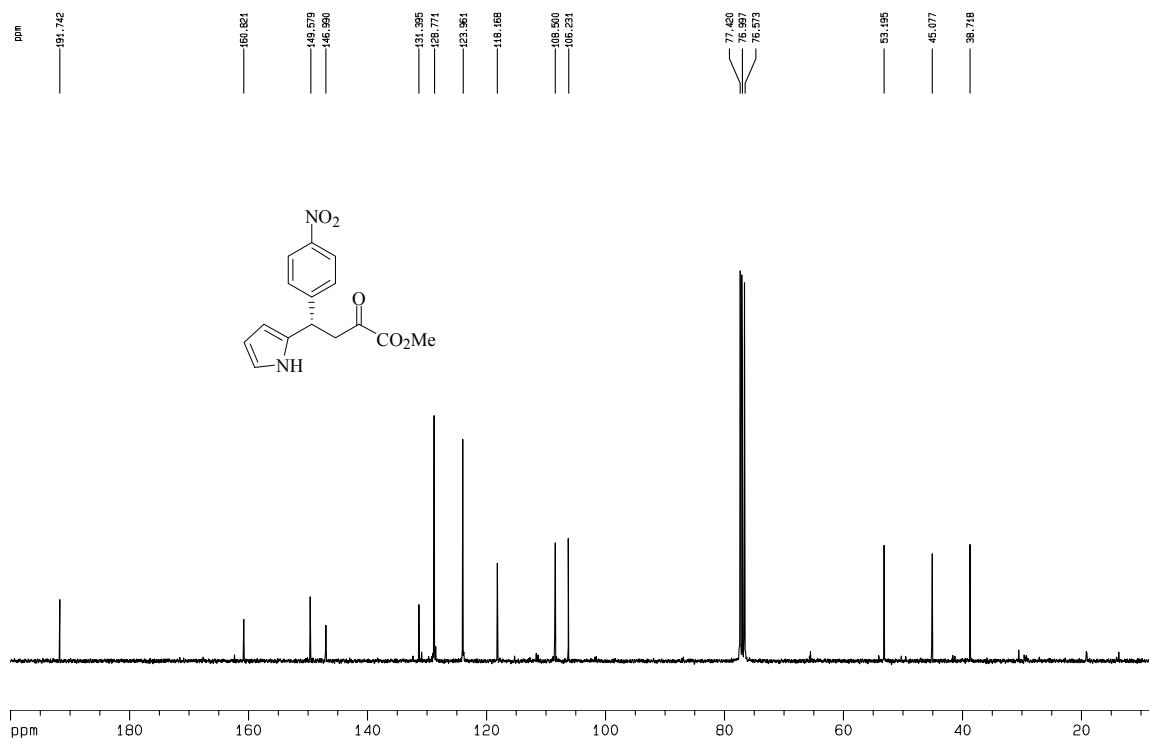

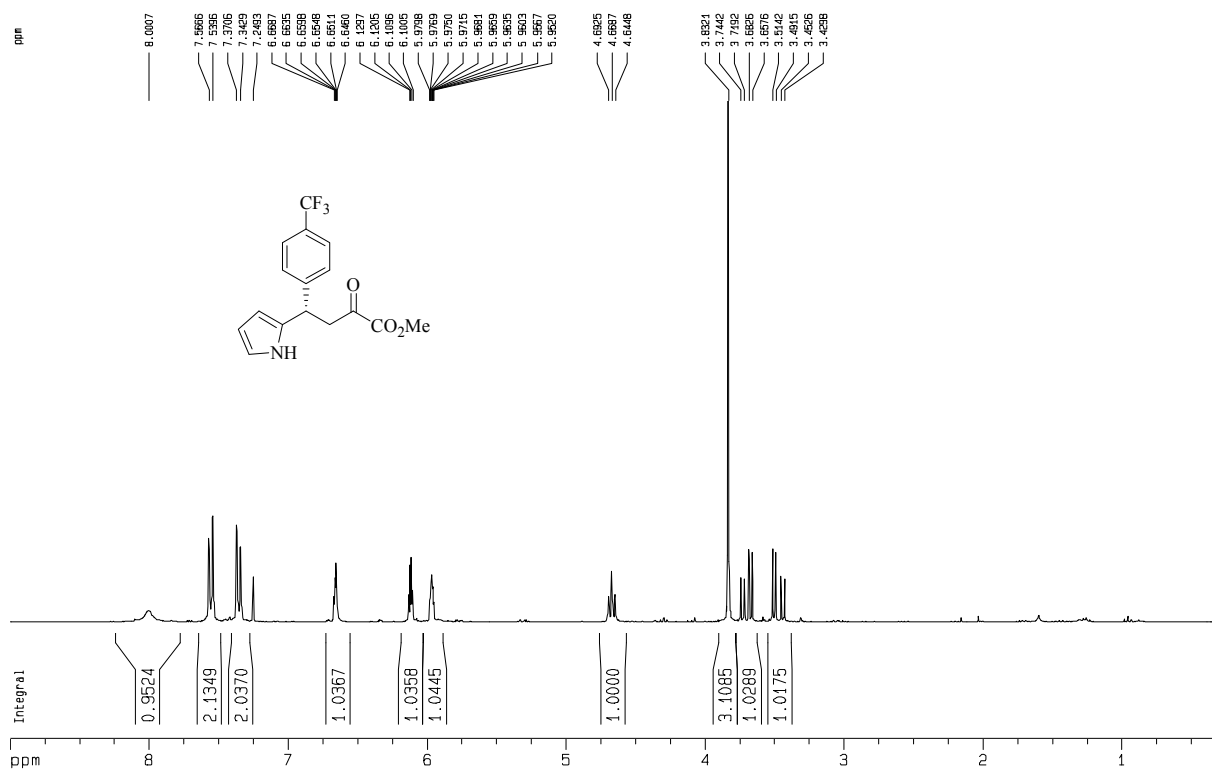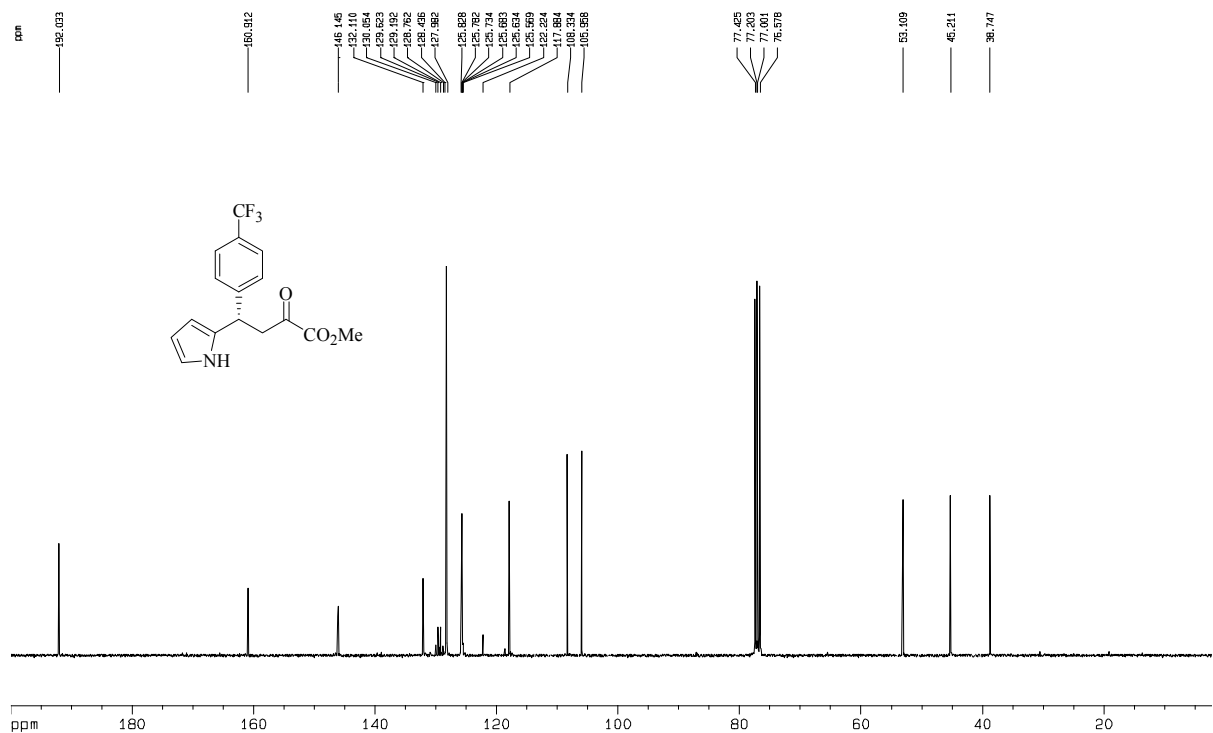

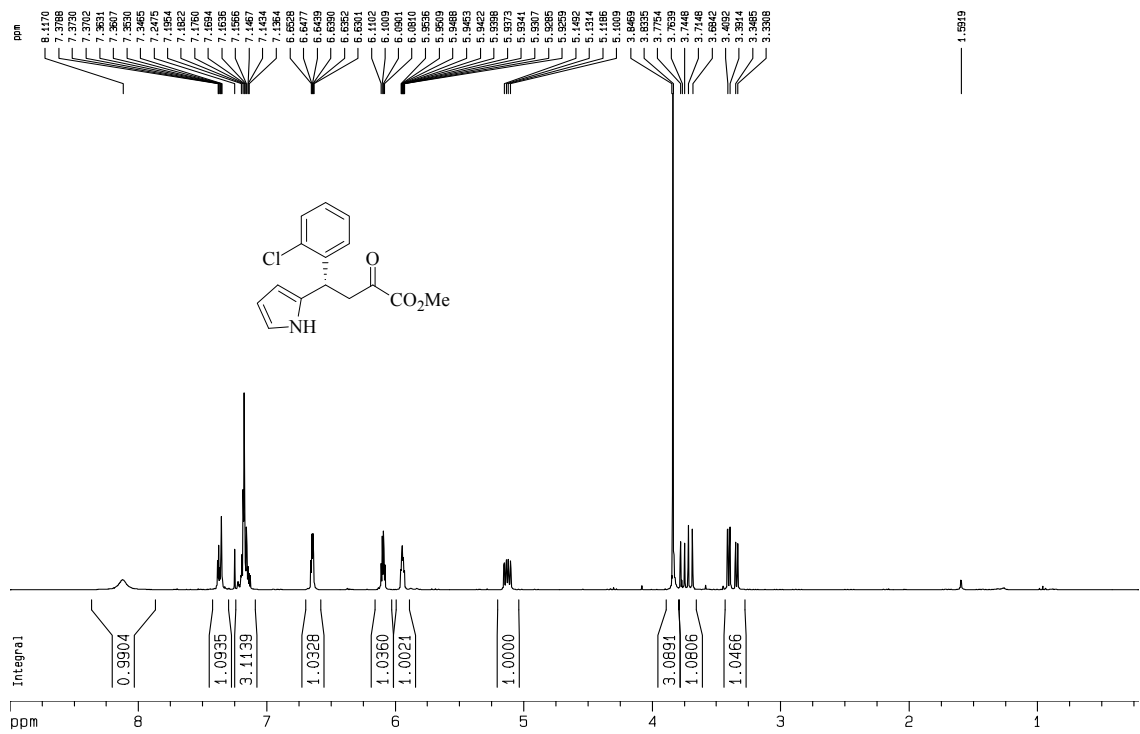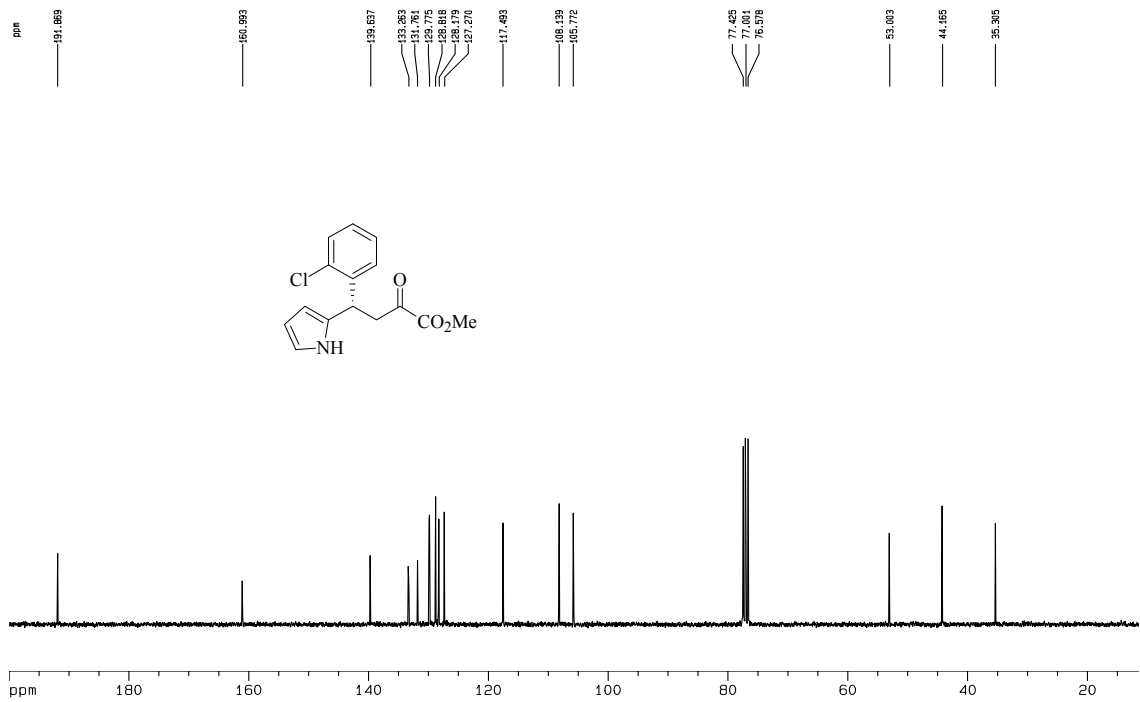

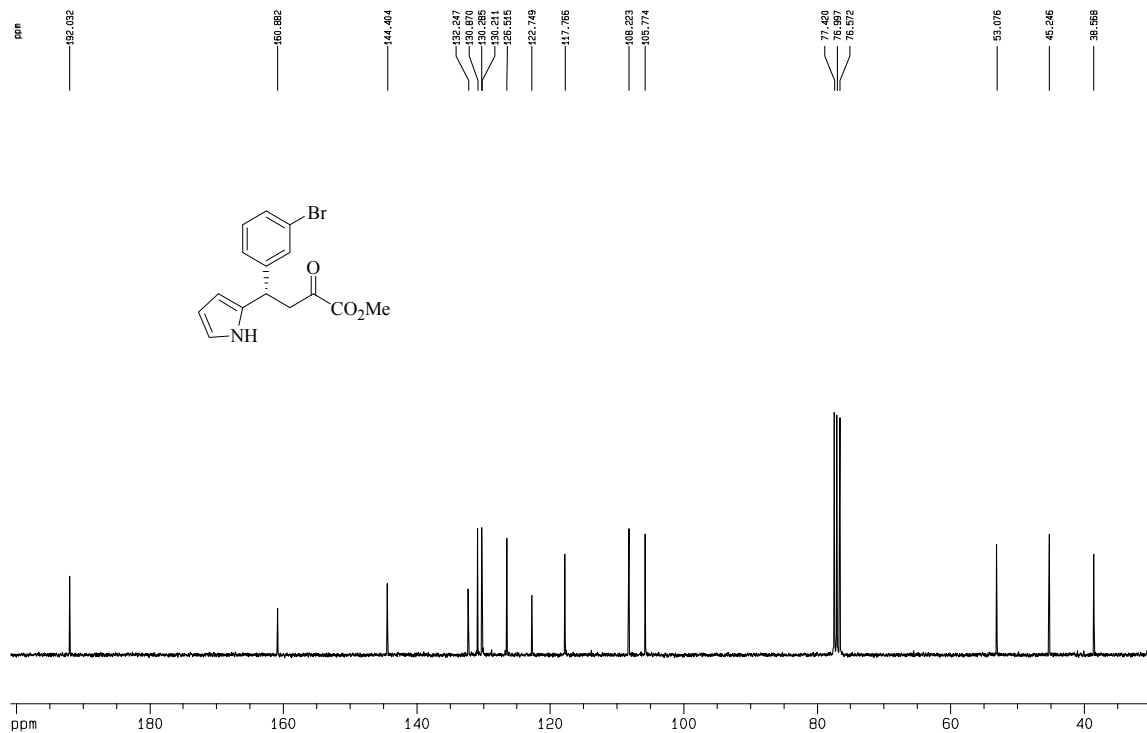

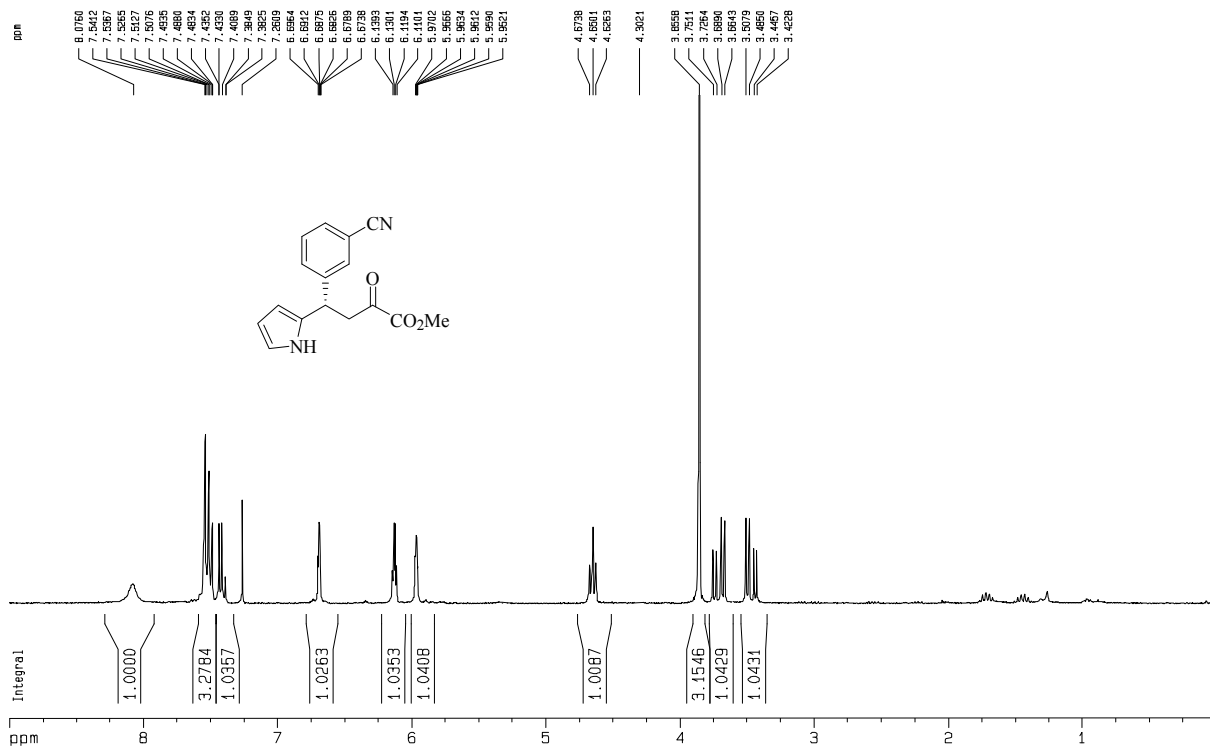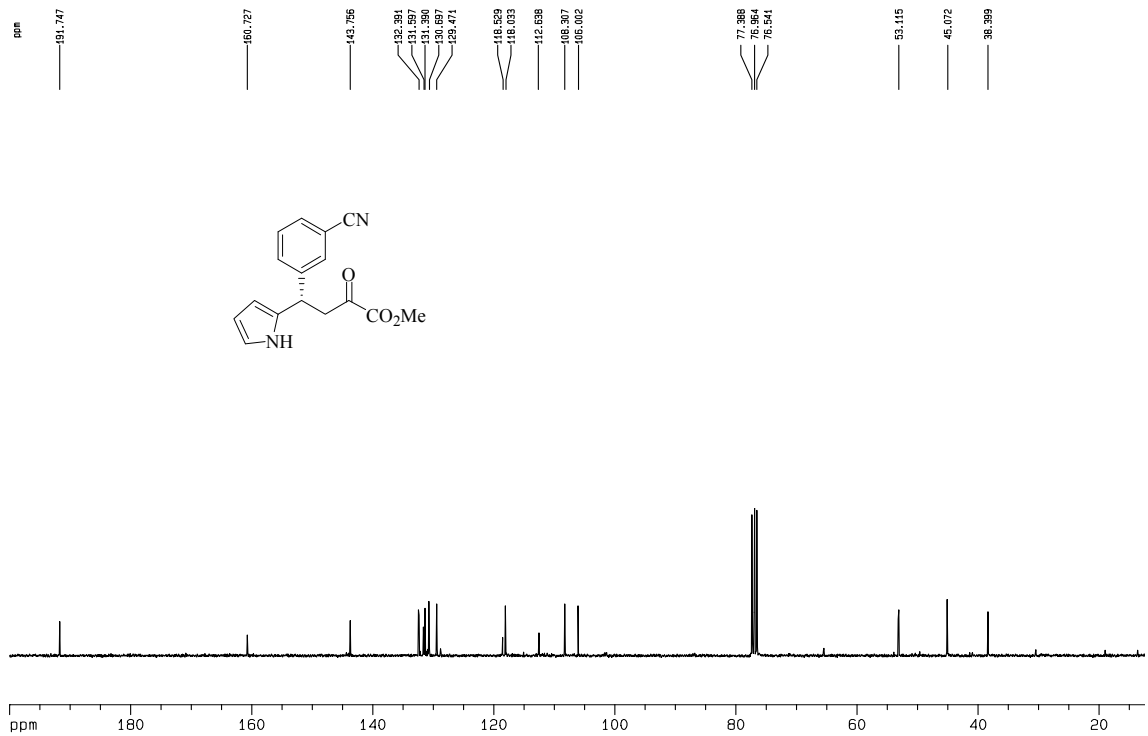

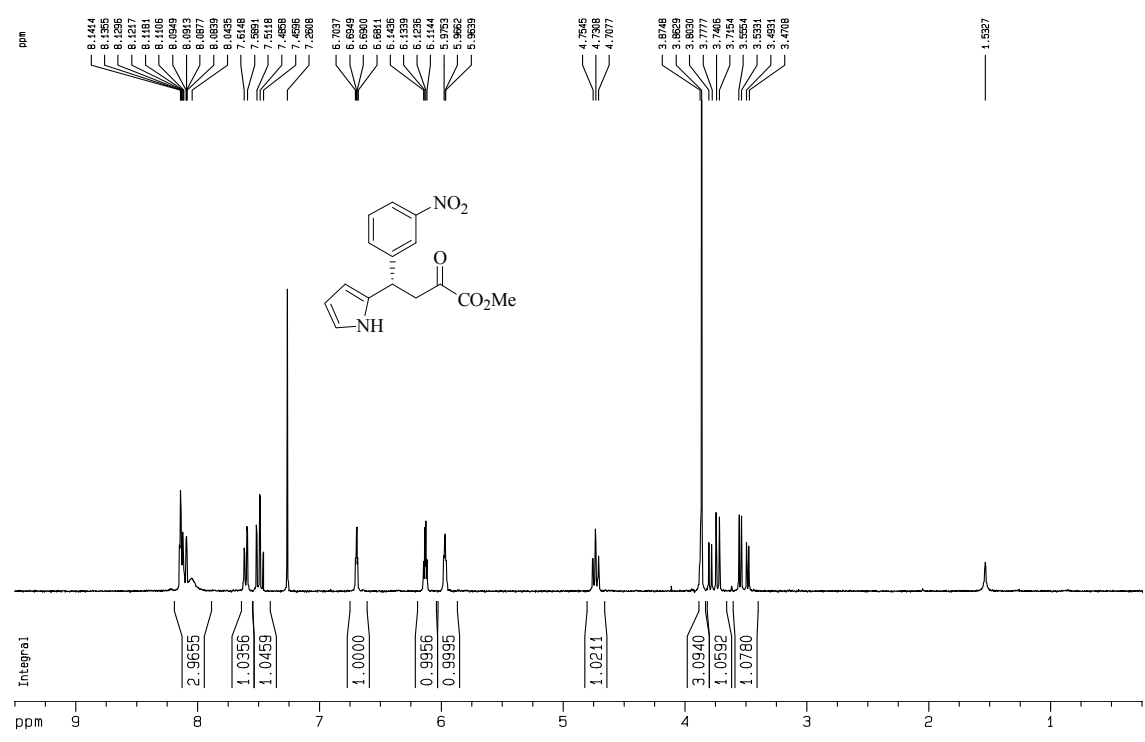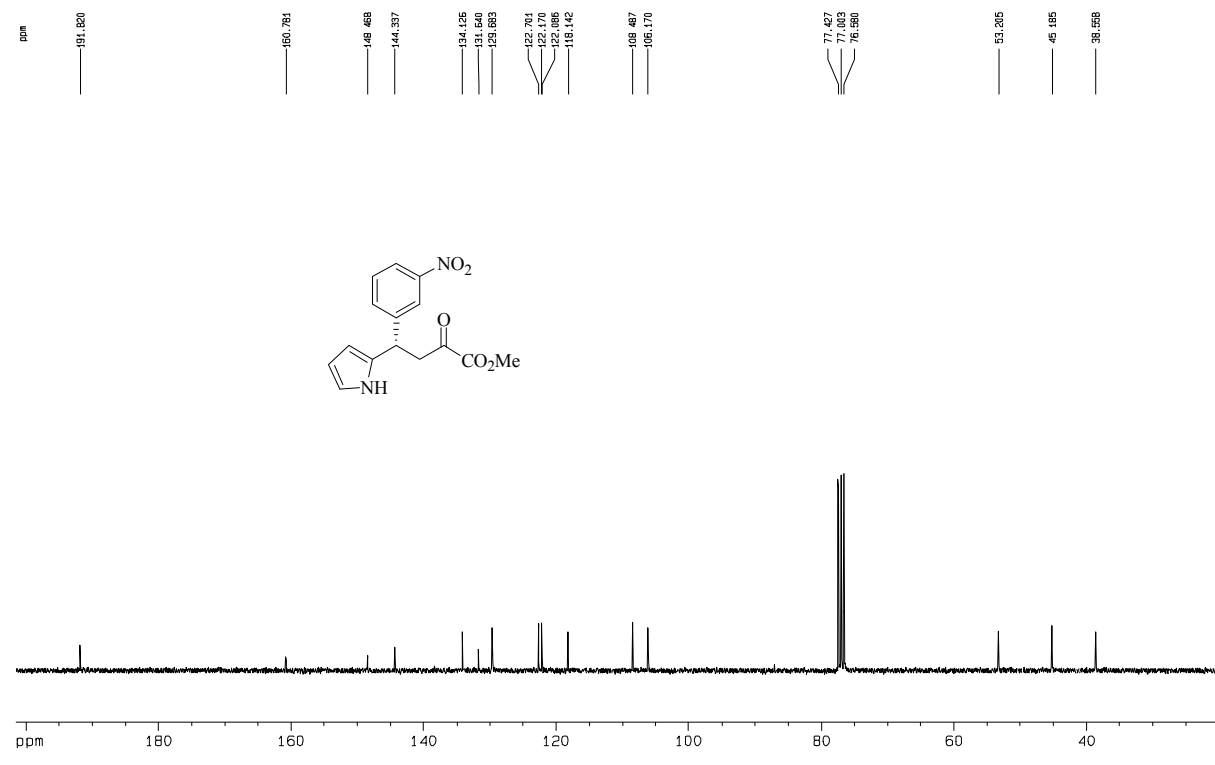

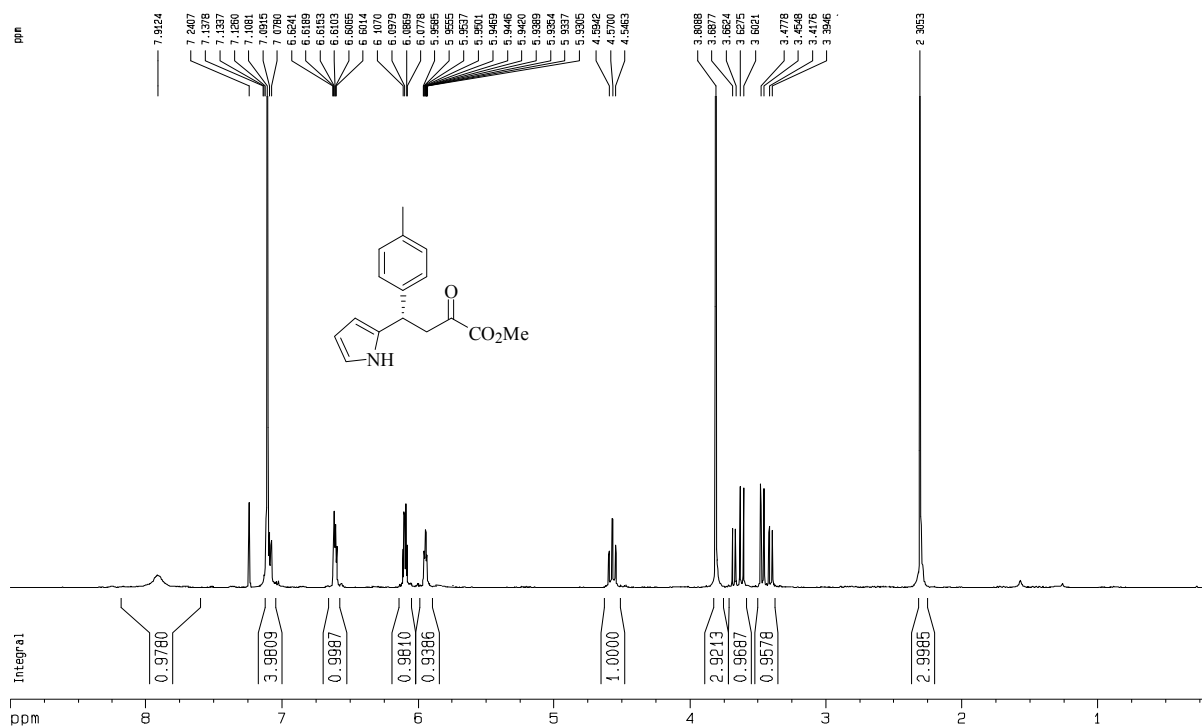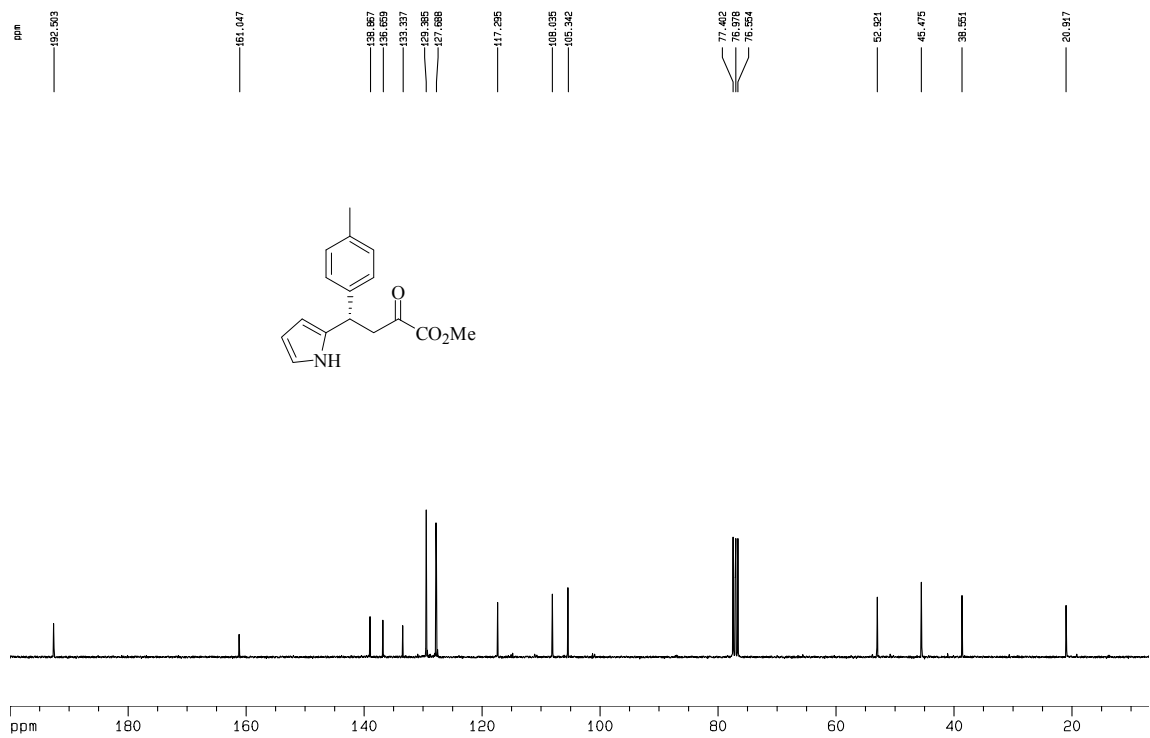



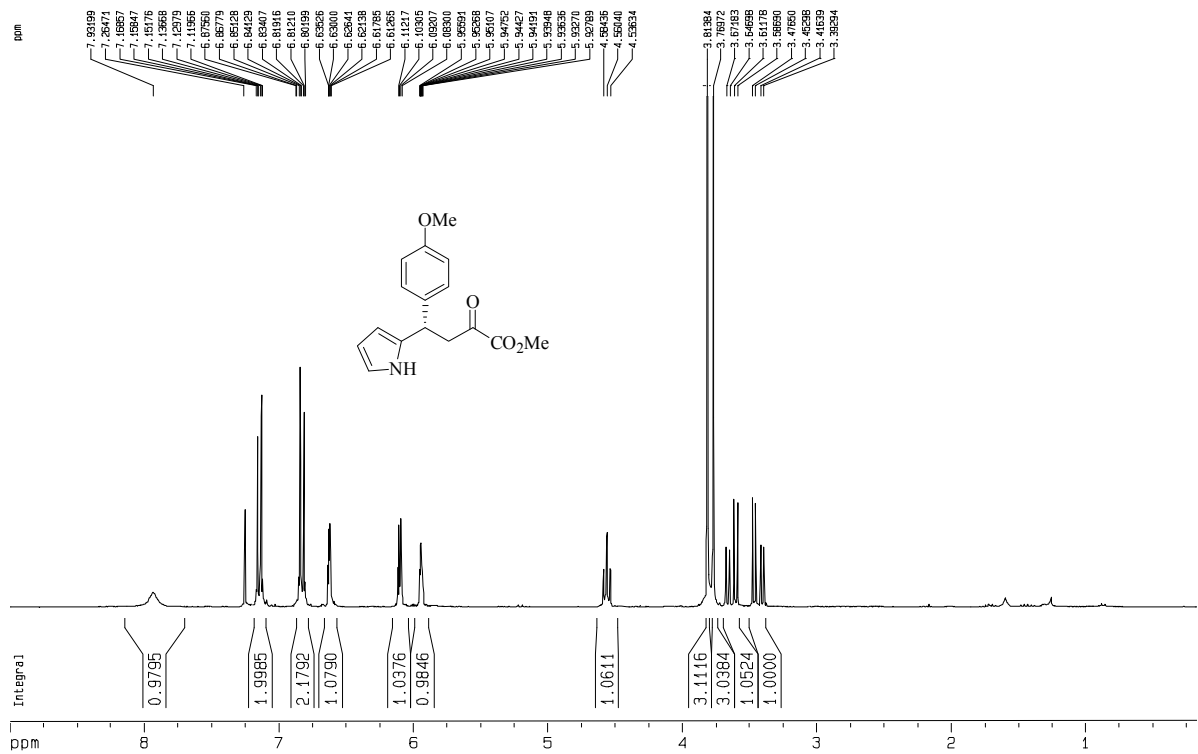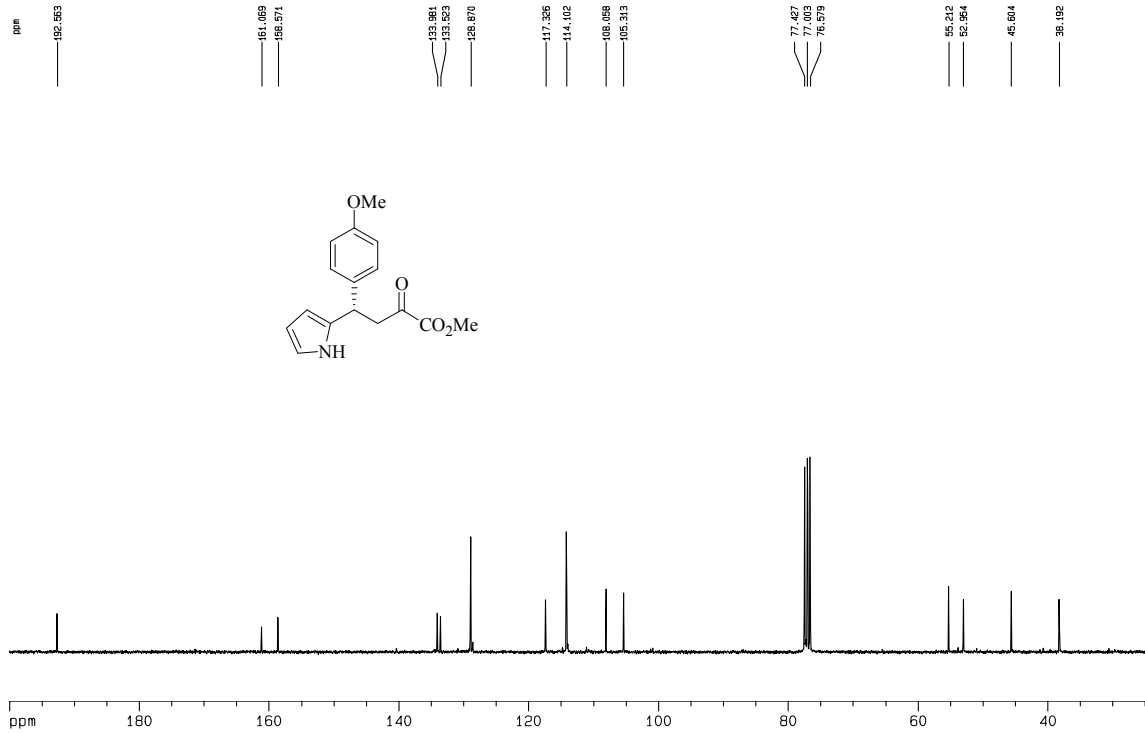

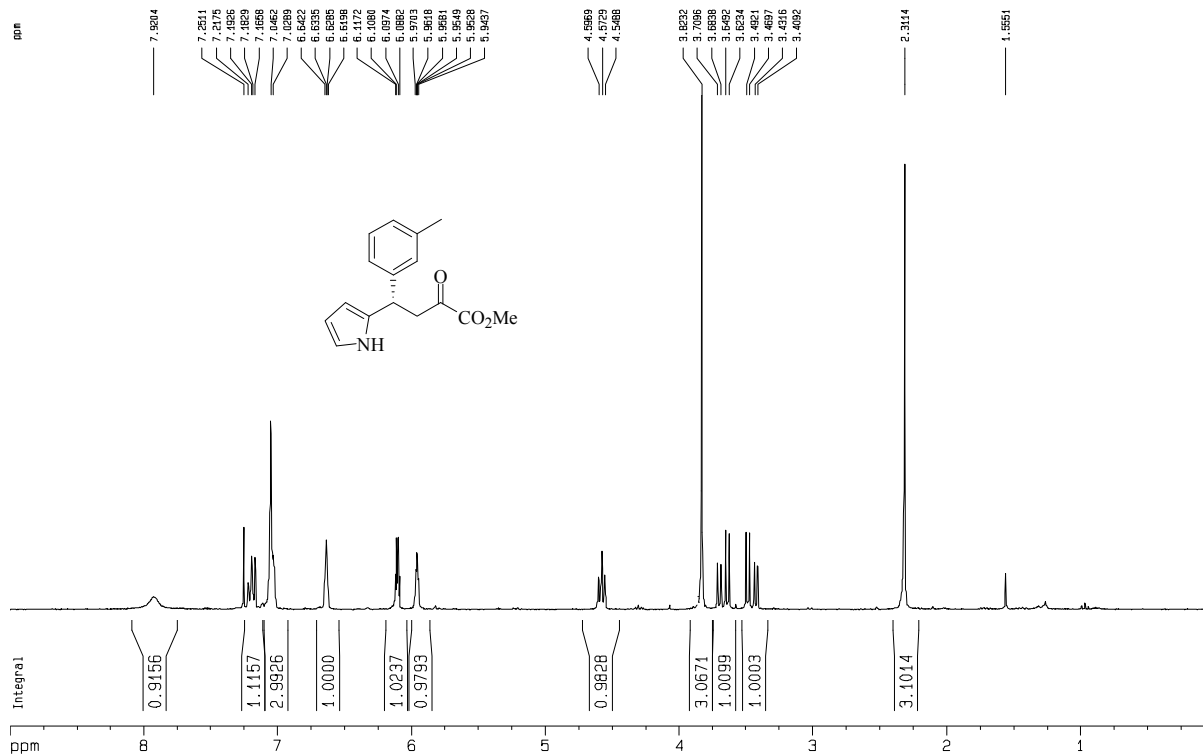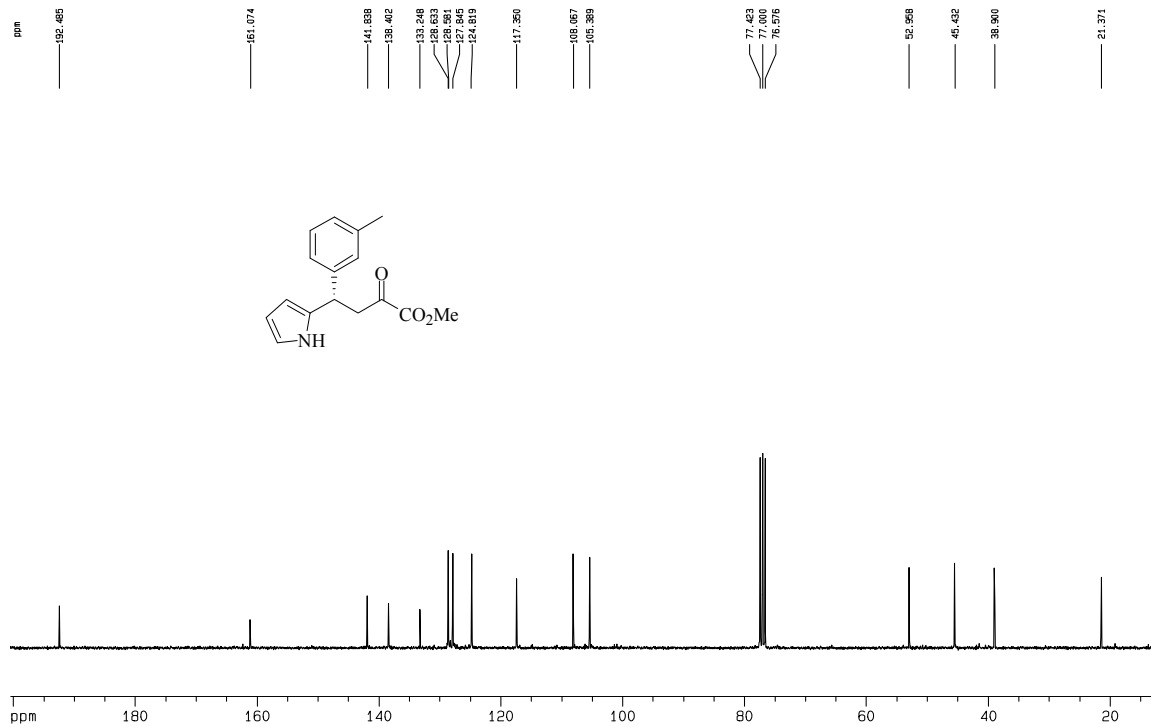

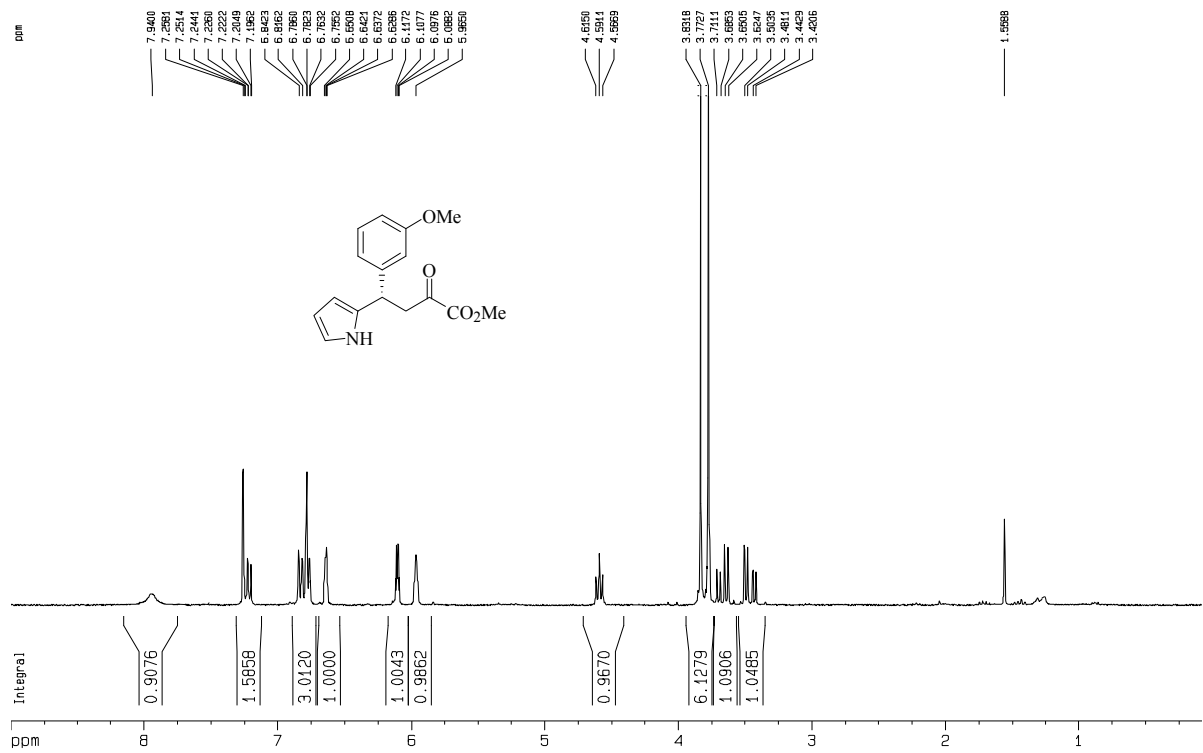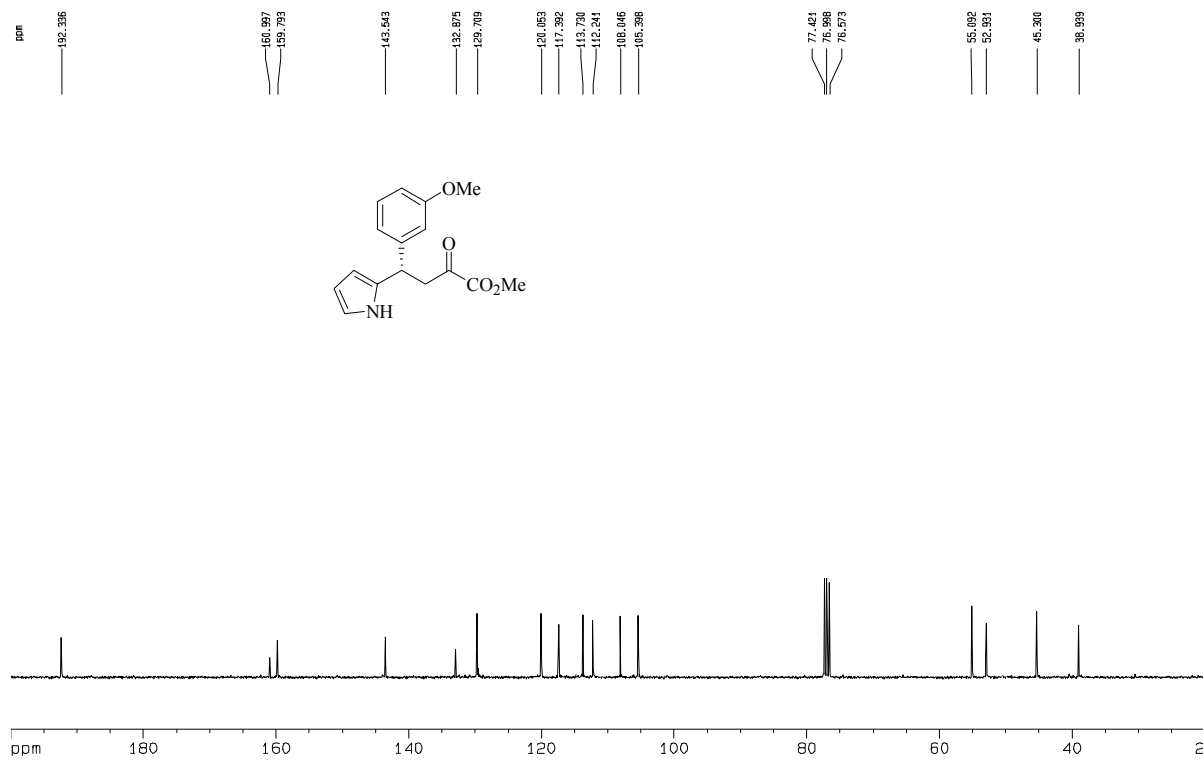

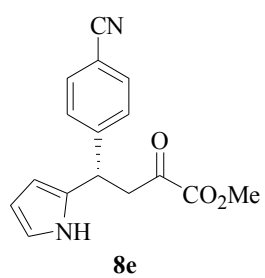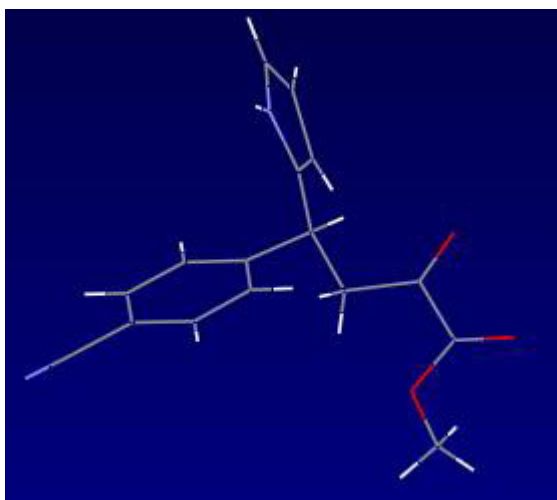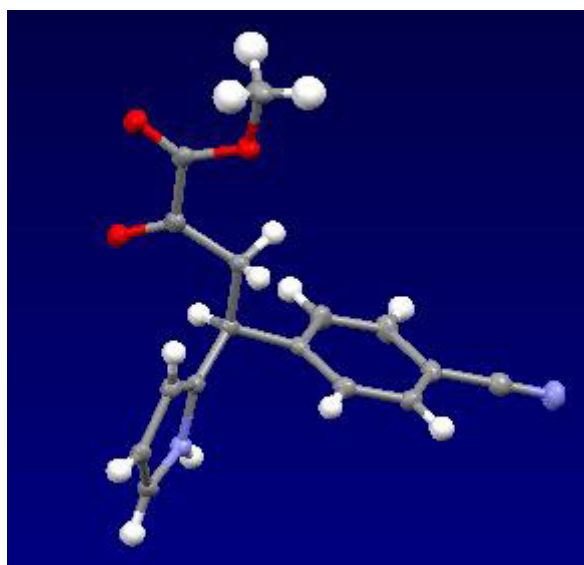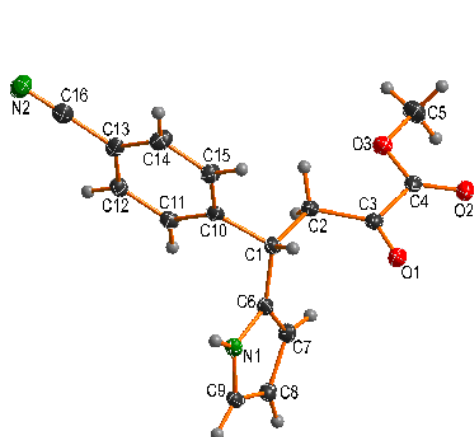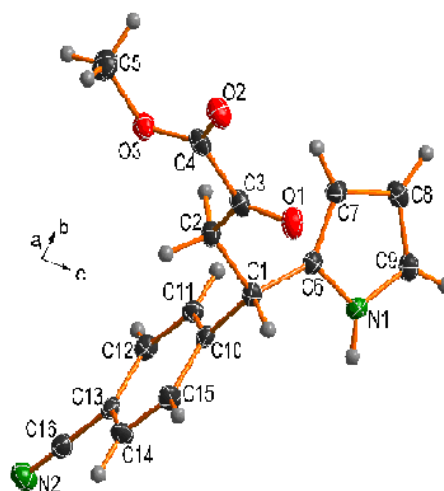

The structure of (S)-8e from different view
